# Supplementary material for: Cp*Ir(iii)/chiral carboxylic acid-catalyzed enantioselective C–H alkylation of ferrocene carboxamides with diazomalonates
Source: Royal Society of Chemistry journal article supplement (doi:10.1039/d1qo01344k), 2021-01-01

*Electronic Supplementary Information*

**Cp\*Ir(III)/Chiral Carboxylic Acid-Catalyzed Enantioselective C-H  
Alkylation of Ferrocene Carboxamides with Diazomalonates**

Qi Mou,<sup>a</sup> Ruyuan Zhao,<sup>a</sup> Ruihan Niu,<sup>a</sup> Seiya Fukagawa,<sup>b</sup> Taiki Shigeno,<sup>b</sup> Tatsuhiko Yoshino,<sup>b,c</sup>  
Shigeki Matsunaga,<sup>\*b,c</sup> and Bo Sun <sup>\*a</sup>

<sup>a</sup> State Key Laboratory Base of Eco-chemical Engineering, College of Chemical Engineering, Qingdao University  
of Science & Technology, Qingdao 266042, P. R. China.

E-mail: sun0109@qust.edu.cn

<sup>b</sup> Faculty of Pharmaceutical Science, Hokkaido University, Sapporo 060-0812, Japan.

Email: smatsuna@pharm.hokudai.ac.jp

<sup>c</sup> Global Station for Biosurfaces and Drug Discovery, Hokkaido University, Sapporo 060-0812, Japan.

**Table of Contents:**

|                                                                                                                 |             |
|-----------------------------------------------------------------------------------------------------------------|-------------|
| <b>1. General Information.....</b>                                                                              | <b>S-2</b>  |
| <b>2. Experimental Section.....</b>                                                                             | <b>S-3</b>  |
| <b>2.1 Preparation of Ferrocene Carboxamides.....</b>                                                           | <b>S-3</b>  |
| <b>2.2 Preparation of CCAs.....</b>                                                                             | <b>S-4</b>  |
| <b>2.3 Effects of Silver Salts in Optimization Studies.....</b>                                                 | <b>S-6</b>  |
| <b>2.4 General Procedure of Cp*Ir(III)/CCA-catalyzed Enantioselective C-H<br/>Alkylation of Ferrocenes.....</b> | <b>S-6</b>  |
| <b>2.5 H/D Exchange Experiments.....</b>                                                                        | <b>S-33</b> |
| <b>2.6 Preparative Scale Reaction .....</b>                                                                     | <b>S-36</b> |
| <b>2.7 Derivation of 3aa.....</b>                                                                               | <b>S-36</b> |
| <b>3. X-ray Crystallographic Analysis of 3aa.....</b>                                                           | <b>S-38</b> |
| <b>4. References.....</b>                                                                                       | <b>S-40</b> |
| <b>5. NMR Spectra.....</b>                                                                                      | <b>S-41</b> |

## 1. General Information

All anhydrous reactions were carried out in a flame-dried glassware under nitrogen atmosphere unless otherwise noted or in an nitrogen-filled glove box.  $^1\text{H}$  and  $^{13}\text{C}$  NMR spectra were recorded on a Bruker Avance (400 MHz and 100 Hz respectively) or Bruker Avance (500 MHz and 125 Hz respectively).  $^{19}\text{F}$  NMR spectra were recorded on a Bruker Avance (376 MHz). The chemical shifts ( $\delta$ ) were recorded in parts per million (ppm). The coupling constants ( $J$ ) were shown in Hertz (Hz). Chemical shifts in  $\text{CDCl}_3$  were reported the residual  $\text{CHCl}_3$  (7.26 ppm for  $^1\text{H}$  NMR, 77.16 ppm for  $^{13}\text{C}$  NMR). HRMS measurements were performed on an Ultima Global spectrometer with an ESI source. **1a**,<sup>[S1]</sup> **1b-1j**,<sup>[S2]</sup> **2a-2i**,<sup>[S3]</sup> **4b**,<sup>[S4]</sup> **4c-4d**<sup>[S5]</sup> were reported previously. All other reagents were commercially available and used as received unless otherwise noted.

## 2. Experimental Section

### 2.1 Preparation of Ferrocene Carboxamides

#### 1-(N,N-dimethyl-1-carbonyl)-1'-tertbutyl-ferrocene (**1k**)

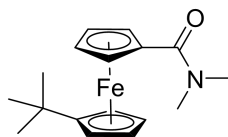

**1k**

**1k** (700mg) was obtained according to the reported method.<sup>[S6]</sup> The total yield was 44% for 2 steps; Red solid; m.p.: 110-112 °C; IR:  $\nu$  2957, 1617, 1392, 1273, 1106, 829  $\text{cm}^{-1}$ ;  $^1\text{H}$  NMR (400 MHz,  $\text{CDCl}_3$ )  $\delta$  4.61 (s, 2H), 4.29 (s, 2H), 4.16 (s, 2H), 4.05 (s, 2H), 3.10 (s, 6H), 1.21 (s, 9H);  $^{13}\text{C}$  NMR (100 MHz,  $\text{CDCl}_3$ )  $\delta$  171.0, 103.2, 78.0, 70.9, 69.8, 69.3, 66.8, 31.4, 30.4; HRMS (ESI): m/z calculated for  $\text{C}_{17}\text{H}_{24}\text{FeNO}^+$   $[\text{M}+\text{H}]^+$ : 314.1202, found: 314.1212.

#### 1-(pyrrolidine-1-carbonyl)-1'-isopropyl-ferrocene (**1l**)

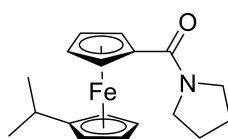

**1l**

**1l** (600mg) was obtained according to the reported method.<sup>[S2]</sup> The total yield was 48% for 3 steps; Red solid; m.p.: 116-118 °C; IR:  $\nu$  2959, 1607, 1407, 1028, 829  $\text{cm}^{-1}$ ;  $^1\text{H}$  NMR (400 MHz,  $\text{CDCl}_3$ )  $\delta$  4.69 (s, 2H), 4.28 (s, 2H), 4.15-4.02 (m, 4H), 3.74-3.53 (m, 4H), 2.66-2.56 (m, 1H), 2.01-1.81 (m, 4H), 1.15 (d,  $J = 6.8$  Hz, 6H);  $^{13}\text{C}$  NMR (100 MHz,  $\text{CDCl}_3$ )  $\delta$  169.2, 98.1, 77.9, 70.7, 70.4, 68.8, 67.6, 48.1, 47.1, 27.2, 26.8, 24.0, 23.5; HRMS (ESI): m/z calculated for  $\text{C}_{18}\text{H}_{24}\text{FeNO}^+$   $[\text{M}+\text{H}]^+$ : 326.1202, found: 326.1209.

#### 1-(pyrrolidine-1-carbonyl)-1'-pentan-3-yl-ferrocene (**1m**)

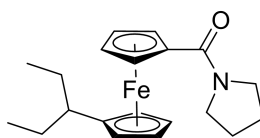

**1m**

**1m** (510mg) was obtained according to the reported method.<sup>[S2]</sup> The total yield was 36% for 3 steps; Red solid; m.p.: 119-121 °C; IR:  $\nu$  2962, 1704, 1410, 1214, 1028, 830  $\text{cm}^{-1}$ ;  $^1\text{H}$  NMR (400 MHz,  $\text{CDCl}_3$ )  $\delta$  4.67 (s, 2H), 4.25 (s, 2H), 4.13-3.98 (m, 4H), 3.75-3.50 (m, 4H), 2.22-2.12 (m, 1H), 2.02-1.80 (m, 4H), 1.68-1.42 (m, 4H), 0.83 (t,  $J = 7.3$  Hz, 6H);  $^{13}\text{C}$  NMR (100 MHz,  $\text{CDCl}_3$ )  $\delta$  169.3, 96.3, 77.8, 70.7, 70.6, 68.6, 68.6, 48.1, 47.1, 40.3, 26.8, 26.5, 24.0, 11.3; HRMS (ESI): m/z calculated for

$C_{20}H_{28}FeNO^+$   $[M+H]^+$ : 354.1515, found: 354.1526.

## 2.2 Preparation of CCA

### (*S*)-2'-[4-methoxy-phenyl]-[1,1'-binaphthalene]-2-carboxylic acid (**4e**)

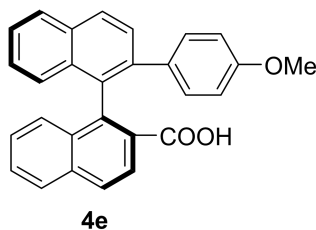

**4e** (570 mg) was synthesized according to the reported method.<sup>[S5]</sup> The total yield was 48% for 4 steps; White solid; m.p.: 121-123 °C; IR:  $\nu$  2925, 1638, 1460, 1246, 1176, 817, 770, 750, 621  $cm^{-1}$ ;  $^1H$  NMR (400 MHz,  $CDCl_3$ )  $\delta$  8.04-7.91 (m, 3H), 7.87-7.81 (m, 2H), 7.57-7.38 (m, 3H), 7.38-7.32 (m, 1H), 7.32-7.18 (m, 2H), 7.04 (d,  $J = 8.5$  Hz, 1H), 6.85-6.74 (m, 2H), 6.49-6.40 (m, 2H), 3.62 (s, 3H);  $^{13}C$  NMR (100 MHz,  $CDCl_3$ )  $\delta$  171.9, 158.0, 140.8, 138.5, 135.1, 134.0, 133.9, 133.4, 132.9, 132.4, 129.9, 128.4, 128.3, 128.0, 128.0, 127.9, 127.9, 127.9, 126.8, 126.3, 126.2, 126.2, 125.5, 112.9, 55.0;  $[\alpha]_D^{23.6} = -73.7$  ( $c = 0.20$ ,  $CHCl_3$ ); HRMS (ESI):  $m/z$  calculated for  $C_{28}H_{21}O_3^+$   $[M+H]^+$ : 405.1485, found: 405.1487.

### (*S*)-2'-[3,5-dimethyl-phenyl]-[1,1'-binaphthalene]-2-carboxylic acid (**4f**)

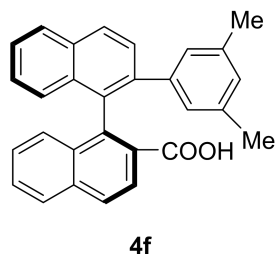

**4f** (430 mg) was synthesized according to the reported method.<sup>[S5]</sup> The total yield was 43% for 4 steps; White solid; m.p.: 197-199 °C; IR:  $\nu$  2924, 1639, 1384, 813, 771, 744, 619  $cm^{-1}$ ;  $^1H$  NMR (400 MHz,  $CDCl_3$ )  $\delta$  7.99 (d,  $J = 8.4$  Hz, 2H), 7.95-7.89 (m, 1H), 7.88-7.78 (m, 2H), 7.55-7.43 (m, 3H), 7.41-7.35 (m, 1H), 7.34-7.20 (m, 2H), 7.15-7.08 (m, 1H), 6.62 (s, 1H), 6.49 (s, 2H), 1.93 (s, 6H);  $^{13}C$  NMR (100 MHz,  $CDCl_3$ )  $\delta$  172.3, 141.4, 140.9, 139.0, 136.7, 135.0, 134.0, 133.7, 132.9, 132.5, 128.5, 128.1, 128.0, 128.0, 127.9, 127.9, 127.8, 126.7, 126.4, 126.3, 126.1, 125.5, 21.0;  $[\alpha]_D^{24.1} = -87.0$  ( $c = 0.20$ ,  $CHCl_3$ ); HRMS (ESI):  $m/z$  calculated for  $C_{29}H_{23}O_2^+$   $[M+H]^+$ : 403.1693, found: 403.1690.

### (*S*)-2'-[3,5-ditertbutyl-phenyl]-[1,1'-binaphthalene]-2-carboxylic acid (**4g**)

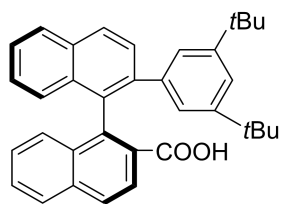

**4g**

**4g** (240 mg) was synthesized according to the reported method.<sup>[S5]</sup> The total yield was 29% for 4 steps; White solid; m.p.: 142-144 °C; IR:  $\nu$  2962, 1691, 1363, 1248, 819, 769, 747, 716  $\text{cm}^{-1}$ ;  $^1\text{H}$  NMR (400 MHz,  $\text{CDCl}_3$ )  $\delta$  8.00 (t,  $J = 7.8$  Hz, 2H), 7.95-7.87 (m, 1H), 7.87-7.74 (m, 2H), 7.60 (d,  $J = 8.4$  Hz, 1H), 7.54-7.38 (m, 3H), 7.35-7.21 (m, 2H), 7.18-7.11 (m, 1H), 7.02-6.97 (m, 1H), 6.78-6.70 (m, 2H), 0.93 (s, 18H);  $^{13}\text{C}$  NMR (100 MHz,  $\text{CDCl}_3$ )  $\delta$  171.8, 149.4, 141.2, 140.6, 140.0, 135.1, 134.2, 133.8, 132.9, 132.4, 128.7, 128.1, 128.0, 127.9, 127.8, 127.8, 127.5, 126.7, 126.4, 126.4, 126.2, 125.4, 123.3, 119.9, 34.4, 31.1;  $[\alpha]_{\text{D}}^{24.6} = -88.4$  ( $c = 0.20$ ,  $\text{CHCl}_3$ ); HRMS (ESI):  $m/z$  calculated for  $\text{C}_{35}\text{H}_{35}\text{O}_2^+$   $[\text{M}+\text{H}]^+$ : 487.2632, found: 487.2641.

**(S)-2'-[3,5-methoxy-phenyl]-[1,1'-binaphthalene]-2-carboxylic acid (4h)**

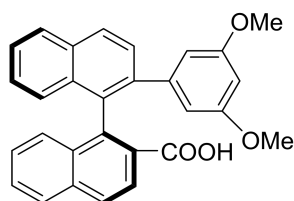

**4h**

**4h** (1.5 g) was synthesized according to the reported method.<sup>[S5]</sup> The total yield was 46% for 4 steps; White solid; m.p.: 162-164 °C; IR:  $\nu$  2953; 1680, 1459, 1285, 1153, 815, 773, 753  $\text{cm}^{-1}$ ;  $^1\text{H}$  NMR (400 MHz,  $\text{CDCl}_3$ )  $\delta$  8.03-7.93 (m, 3H), 7.86 (d,  $J = 8.6$  Hz, 2H), 7.56 (d,  $J = 8.5$  Hz, 1H), 7.53-7.42 (m, 2H), 7.38-7.34 (m, 1H), 7.33-7.27 (m, 1H), 7.25-7.21 (m, 1H), 7.09 (d,  $J = 8.5$  Hz, 1H), 6.14-6.08 (m, 3H), 3.30 (s, 6H);  $^{13}\text{C}$  NMR (100 MHz,  $\text{CDCl}_3$ )  $\delta$  171.5, 159.7, 143.5, 140.8, 138.7, 135.0, 134.0, 133.7, 132.9, 132.6, 128.4, 128.0, 127.9, 127.9, 127.9, 127.8, 126.8, 126.4, 125.7, 106.8, 99.8, 54.9;  $[\alpha]_{\text{D}}^{25.3} = -109.1$  ( $c = 0.20$ ,  $\text{CHCl}_3$ ); HRMS (ESI):  $m/z$  calculated for  $\text{C}_{29}\text{H}_{23}\text{O}_4^+$   $[\text{M}+\text{H}]^+$ : 435.1591, found: 435.1600.

## 2.3 Effects of Silver Salts in Optimization Studies

**Table S1. Effects of Silver Salts<sup>a</sup>**

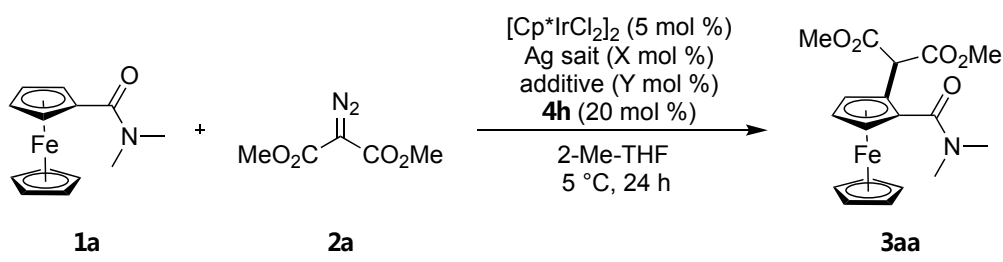

| Entry          | Ag salt (X mol%)        | additive (Y mol %)                   | Yield (%) | er    |
|----------------|-------------------------|--------------------------------------|-----------|-------|
| 1              | AgPF <sub>6</sub> (20)  | -                                    | 42        | 84:16 |
| 2              | AgBF <sub>4</sub> (20)  | -                                    | trace     | -     |
| 3              | AgSbF <sub>6</sub> (20) | -                                    | 62        | 89:11 |
| 4              | AgNTf <sub>2</sub> (20) | -                                    | 57        | 91:9  |
| 5 <sup>b</sup> | AgNTf <sub>2</sub> (20) | Ag <sub>2</sub> CO <sub>3</sub> (5)  | 74        | 91:9  |
| 6 <sup>b</sup> | AgNTf <sub>2</sub> (20) | Ag <sub>2</sub> CO <sub>3</sub> (10) | 68        | 93:7  |
| 7 <sup>b</sup> | AgNTf <sub>2</sub> (30) | Ag <sub>2</sub> CO <sub>3</sub> (10) | 84        | 92:8  |

<sup>a</sup>Reaction conditions: **1** (0.1 mmol), **2a** (0.13 mmol), [Cp\*IrCl<sub>2</sub>]<sub>2</sub> (5 mol %), AgNTf<sub>2</sub> (X mol %), additive (Y mol %), **4h** (30 mol %) in 2-Me-THF 1 mL at 5 °C under N<sub>2</sub> for 24 h. <sup>b</sup>**4h** (30 mol %), 2-Me-THF(0.5 mL).

## 2.4 General Procedure of Cp\*Ir(III)/CCA-catalyzed Enantioselective C-H Alkylation of Ferrocenes

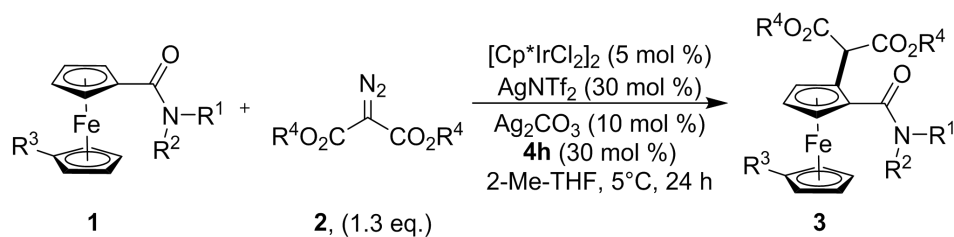

To a dried screw-capped vial added ferrocene carboxamides **1** (0.10 mmol), diazomalonates **2** (0.13 mmol, 1.3 eq.), [Cp\*IrCl<sub>2</sub>]<sub>2</sub> (4.0 mg, 0.005 mmol), AgNTf<sub>2</sub> (11.7 mg, 0.03 mmol), Ag<sub>2</sub>CO<sub>3</sub> (2.8 mg, 0.01 mmol), **4h** (13.1 mg, 0.03 mmol) and 2-Me-THF (0.5 mL) under nitrogen atmosphere. The vial was capped, and the mixture was cooled at 5 °C for 24 h with stirring. The resulting mixture directly purified by silica gel column chromatography (petroleum ether:acetone = 8:1-4:1) to give product **3**.

**(*S<sub>p</sub>*)-2-Dimethyl malonate-(dimethyl-1-carbonyl)ferrocene (**3aa**):**

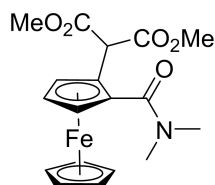

**3aa**

Compound **3aa** was prepared according to the general procedure. The crude product was purified by silica gel chromatography (petroleum ether:acetone = 8:1-4:1) to provide **3aa** (32.5 mg, 84%); Yellow solid; m.p.: 105-107 °C; IR:  $\nu$  2952, 1734, 1618, 1501, 1156, 822  $\text{cm}^{-1}$ ;  $^1\text{H}$  NMR (400 MHz,  $\text{CDCl}_3$ )  $\delta$  5.18 (s, 1H), 4.56 (s, 1H), 4.36 (s, 1H), 4.25 (t,  $J = 2.4$  Hz, 1H), 4.20 (s, 5H), 3.89 (s, 3H), 3.63 (s, 3H), 3.00 (s, 6H);  $^{13}\text{C}$  NMR (100 MHz,  $\text{CDCl}_3$ )  $\delta$  170.0, 168.7, 168.7, 82.2, 80.5, 70.8, 68.8, 68.2, 67.4, 52.7, 52.4, 50.3, 29.7; HRMS (ESI):  $m/z$  calculated for  $\text{C}_{18}\text{H}_{22}\text{FeNO}_5^+$  [ $\text{M}+\text{H}$ ] $^+$ : 388.0842, found: 388.0855; HPLC separation (DAICEL CHIRALPAK IA, hexane:2-propanol = 90:10, flow rate: 1.0 mL/min, detection at 254nm):  $t_{\text{R}}$ (major) = 13.1 min,  $t_{\text{R}}$ (minor) = 11.9 min, 92:8 er.

mAU

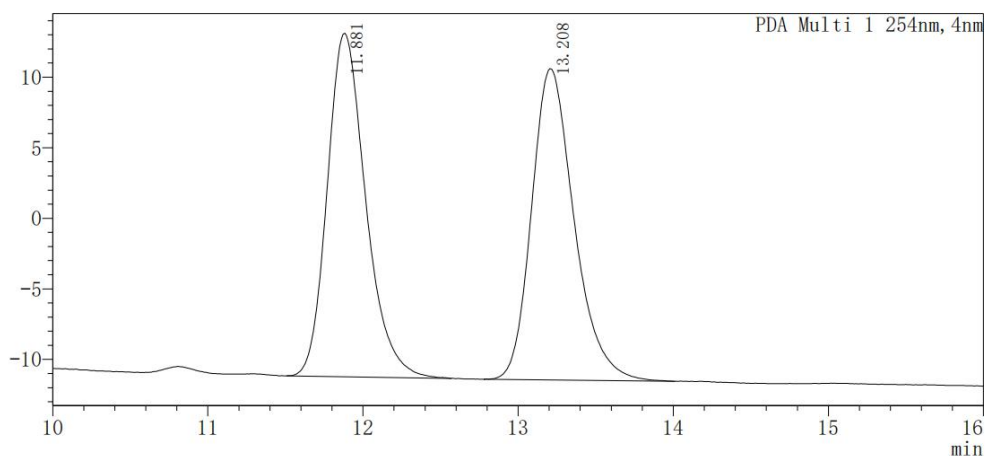

PDA Ch1 254nm

| Peak No | Ret. time | Area/% |
|---------|-----------|--------|
| 1       | 11.881    | 49.947 |
| 2       | 13.208    | 50.053 |

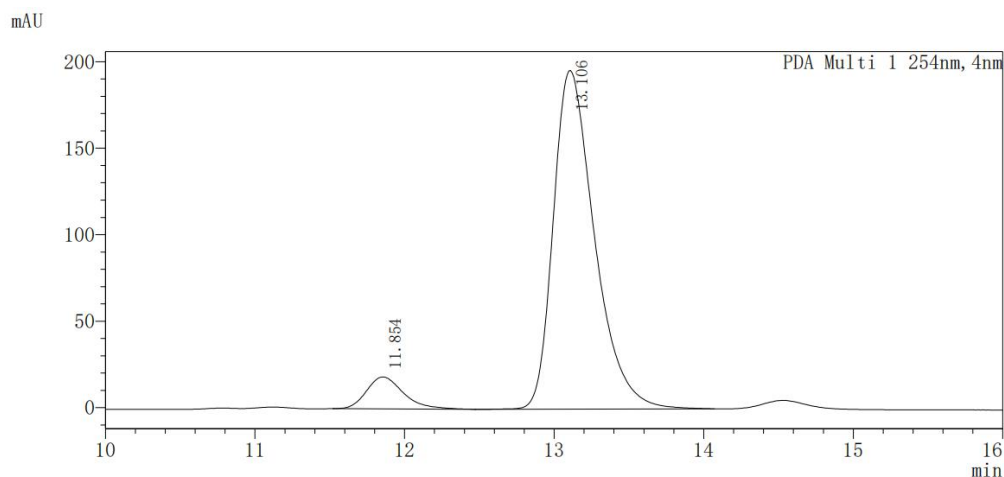

| PDA Ch1 254nm |           |        |
|---------------|-----------|--------|
| Peak No       | Ret. time | Area/% |
| 1             | 11.854    | 7.794  |
| 2             | 13.106    | 92.206 |

**(*S<sub>p</sub>*)-2-Dimethyl malonate-(methyl-ethyl-1-carbonyl)ferrocene (**3ba**):**

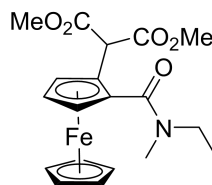

**3ba**

Compound **3ba** was prepared according to the general procedure. The crude product was purified by silica gel chromatography (petroleum ether:acetone = 8:1-4:1) to provide **3ba** (32.9 mg, 82%); Yellow solid; m.p.: 104-106 °C; IR:  $\nu$  2953, 1737, 1618, 1492, 1196, 822  $\text{cm}^{-1}$ ;  $^1\text{H}$  NMR (500 MHz,  $\text{CDCl}_3$ )  $\delta$  5.17 (s, 1H), 4.55 (s, 1H), 4.35 (s, 1H), 4.24 (s, 1H), 4.20 (s, 5H), 3.89 (s, 3H), 3.62 (s, 3H), 3.59-3.24 (m, 2H), 2.95 (s, 3H), 1.12 (t,  $J = 7.0$  Hz, 3H);  $^{13}\text{C}$  NMR (125 MHz,  $\text{CDCl}_3$ )  $\delta$  168.7, 168.6, 82.3, 81.2, 70.8, 68.6, 67.3, 52.6, 52.3, 50.3, 29.8, 13.9; HRMS (ESI):  $m/z$  calculated for  $\text{C}_{19}\text{H}_{24}\text{FeNO}_5^+$   $[\text{M}+\text{H}]^+$ : 402.0998, found: 402.1001; HPLC separation (DAICEL CHIRALPAK AD, hexane:2-propanol = 95:5, flow rate: 1.0 mL/min, detection at 254nm):  $t_{\text{R}}(\text{major}) = 22.7$  min,  $t_{\text{R}}(\text{minor}) = 18.1$  min, 89:11 er.



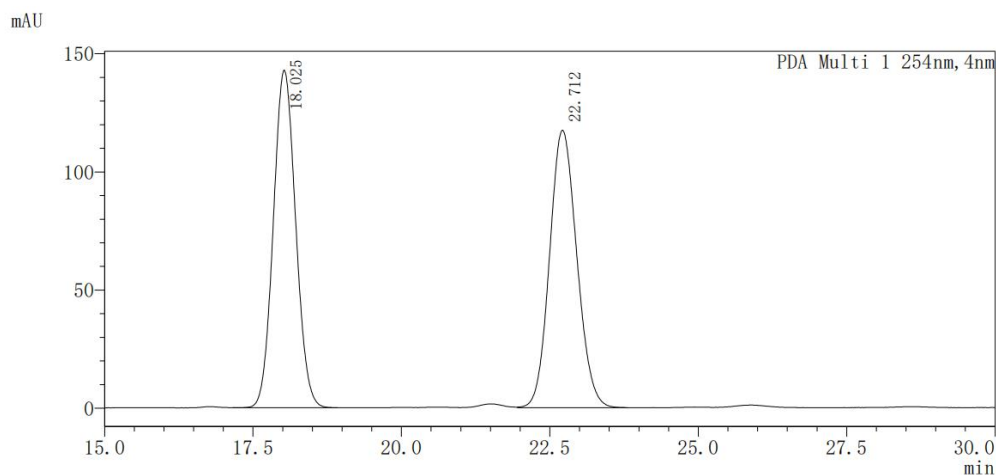

| PDA Ch1 254nm |           |        |
|---------------|-----------|--------|
| Peak No       | Ret. time | Area/% |
| 1             | 18.025    | 49.942 |
| 2             | 22.712    | 50.058 |

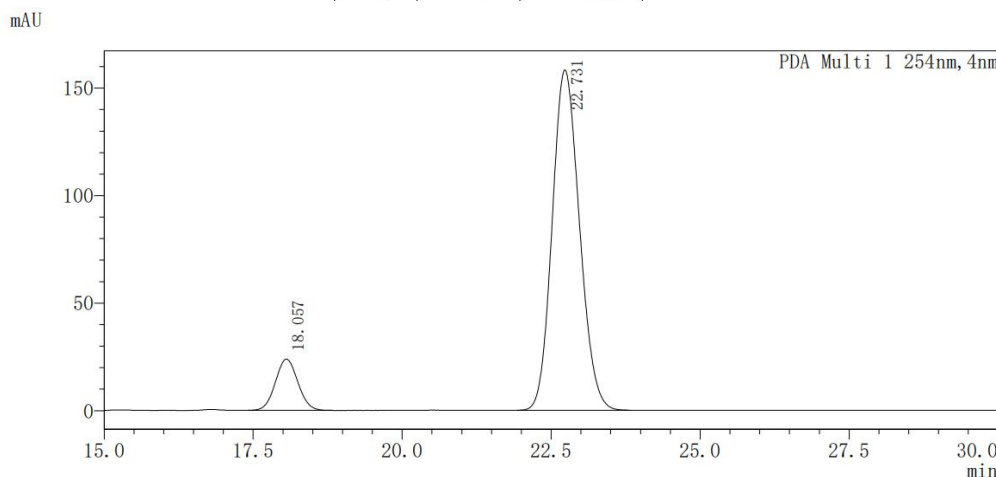

| PDA Ch1 254nm |           |        |
|---------------|-----------|--------|
| Peak No       | Ret. time | Area/% |
| 1             | 18.057    | 10.993 |
| 2             | 22.731    | 89.007 |

**(*S<sub>p</sub>*)-2-Dimethyl malonate-(methyl-benzyl-1-carbonyl)ferrocene (**3ca**):**

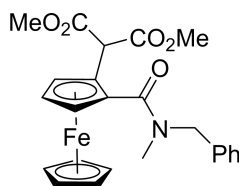

**3ca**

Compound **3ca** was prepared according to the general procedure. The crude product was purified by silica gel chromatography (petroleum ether:acetone = 8:1-4:1) to provide **3ca** (35.2 mg, 76%); Yellow solid; m.p.: 93-95 °C; IR:  $\nu$  2923, 1726, 1612, 1264, 1142, 823  $\text{cm}^{-1}$ ;  $^1\text{H}$  NMR (500 MHz,  $\text{CDCl}_3$ )  $\delta$  7.42-7.15 (m, 5H), 5.30 (s, 1H), 4.83 (d,  $J$  = 15 Hz, 1H), 4.58 (s, 1H), 4.54-4.06 (m, 8H), 3.91 (s, 3H), 3.79-3.43 (m, 3H), 2.92 (s, 3H);  $^{13}\text{C}$  NMR (125 MHz,  $\text{CDCl}_3$ )  $\delta$  168.7, 168.6, 137.4, 128.7, 127.3, 82.7, 81.6, 70.9, 67.7, 67.6, 52.6, 52.4, 50.3, 29.7; HRMS (ESI):  $m/z$  calculated for  $\text{C}_{24}\text{H}_{26}\text{FeNO}_5^+$   $[\text{M}+\text{H}]^+$ : 464.1155, found: 464.1165; HPLC separation (DAICEL

CHIRALPAK AD, hexane:2-propanol = 95:5, flow rate: 1.0 mL/min, detection at 254nm):  $t_R(\text{major}) = 34.9$  min,  $t_R(\text{minor}) = 32.0$  min, 87:13 er.

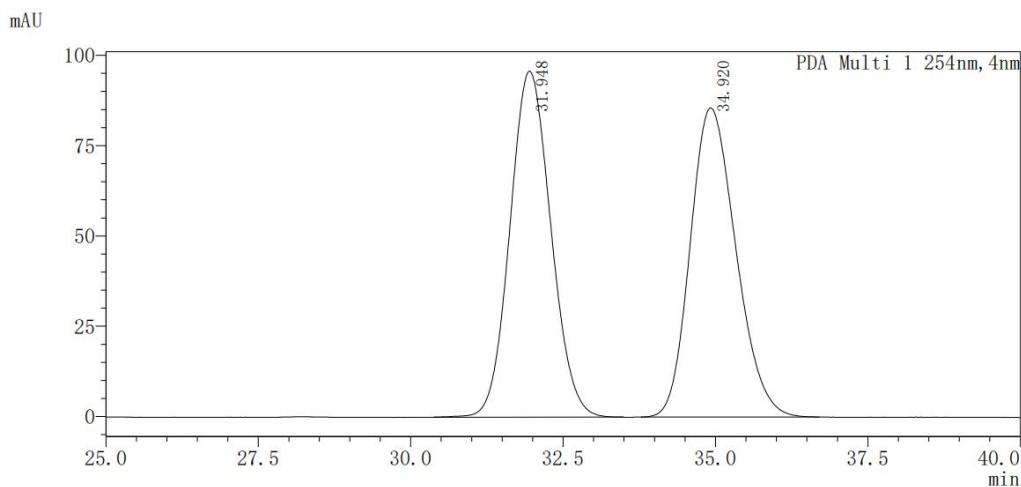

| Peak No | Ret. time | Area/% |
|---------|-----------|--------|
| 1       | 31.948    | 50.093 |
| 2       | 34.920    | 49.907 |

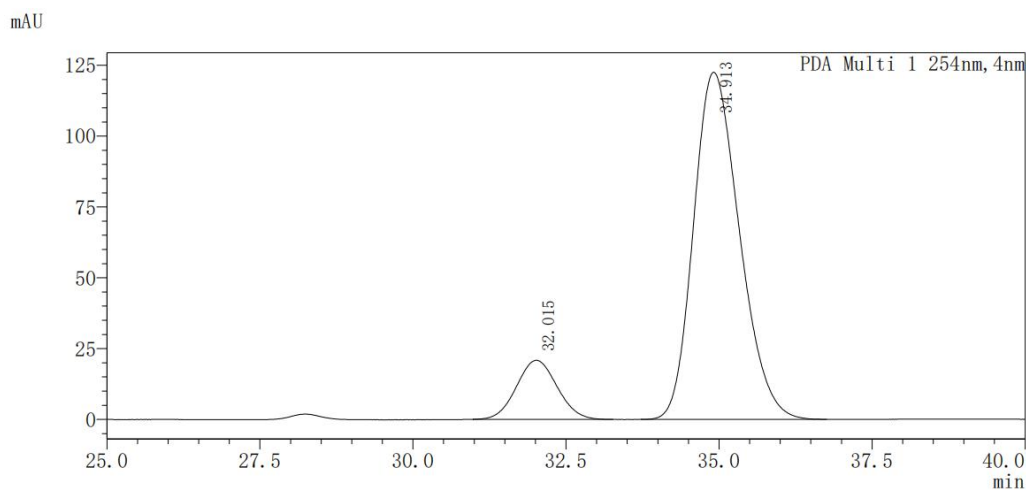

| Peak No | Ret. time | Area/% |
|---------|-----------|--------|
| 1       | 32.015    | 13.106 |
| 2       | 34.913    | 86.894 |

**(*S*<sub>p</sub>)-2-Dimethyl malonate-(pyrrolidine-1-carbonyl)ferrocene (**3da**):**

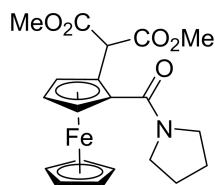

**3da**

Compound **3da** was prepared according to the general procedure. The crude product was purified by silica gel chromatography (petroleum ether:acetone = 8:1-4:1) to provide **3da** (33.9 mg, 82%); Yellow solid; m.p.: 117-119 °C; IR:  $\nu$  2927, 1734, 1608, 1435, 1214, 825  $\text{cm}^{-1}$ ;  $^1\text{H}$  NMR (400 MHz,  $\text{CDCl}_3$ )  $\delta$  5.39 (s, 1H), 4.53 (s, 1H),

4.44 (s, 1H), 4.29-4.23 (m, 1H), 4.18 (s, 5H), 3.88 (s, 3H), 3.62 (s, 3H), 3.60-3.37 (m, 4H), 1.97-1.74 (m, 4H);  $^{13}\text{C}$  NMR (100 MHz,  $\text{CDCl}_3$ )  $\delta$  168.9, 168.8, 168.8, 82.4, 79.4, 70.7, 69.2, 68.1, 68.0, 52.6, 52.3, 50.7, 48.8, 46.4, 29.7, 26.6, 24.2; HRMS (ESI):  $m/z$  calculated for  $\text{C}_{20}\text{H}_{24}\text{FeNO}^{5+}$   $[\text{M}+\text{H}]^+$ : 414.0998, found: 414.0999; HPLC separation (DAICEL CHIRALPAK IA, hexane:2-propanol = 95:5, flow rate: 1.0 mL/min, detection at 254nm):  $t_{\text{R}}(\text{major}) = 34.0$  min,  $t_{\text{R}}(\text{minor}) = 25.7$  min, 86:14 er.

mAU

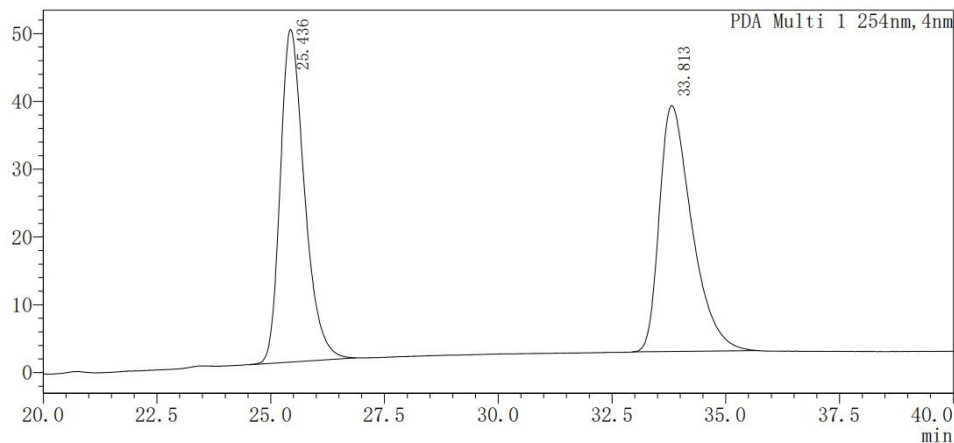

PDA Ch1 254nm

| Peak No | Ret. time | Area/% |
|---------|-----------|--------|
| 1       | 25.436    | 50.123 |
| 2       | 33.813    | 49.877 |

mAU

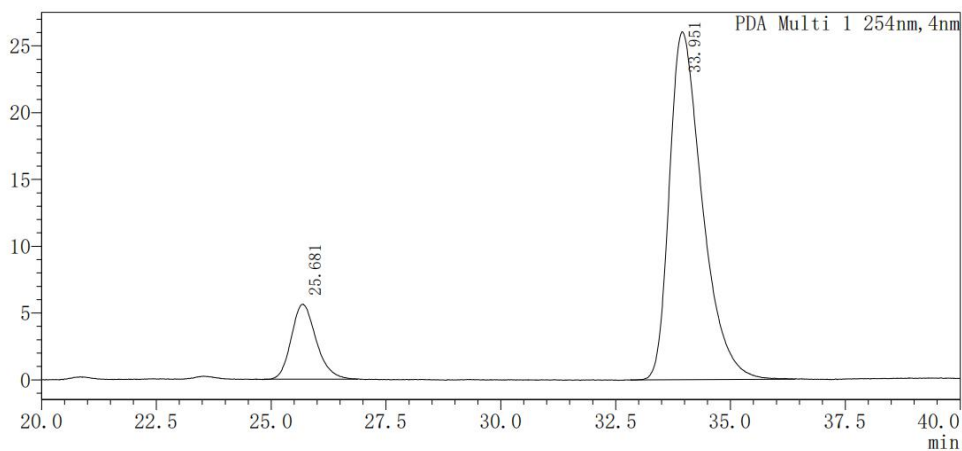

PDA Ch1 254nm

| Peak No | Ret. time | Area/% |
|---------|-----------|--------|
| 1       | 25.681    | 14.020 |
| 2       | 33.951    | 85.980 |

**(*S*<sub>p</sub>)-2-Dimethyl malonate-(pyrrolidine-1-carbonyl)ferrocene (3ea):**

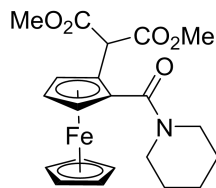

**3ea**

Compound **3ea** was prepared according to the general procedure. The crude product was purified by silica gel chromatography (petroleum ether:acetone = 8:1-4:1) to provide **3ea** (29.9 mg, 70%); Yellow solid; m.p.: 115-117 °C; IR:  $\nu$  2937, 1736, 1615, 1215, 1026, 821  $\text{cm}^{-1}$ ;  $^1\text{H}$  NMR (400 MHz,  $\text{CDCl}_3$ )  $\delta$  5.14 (s, 1H), 4.56 (s, 1H), 4.30 (s, 1H), 4.25-4.22 (m, 1H), 4.20 (s, 5H), 3.89 (s, 3H), 3.63 (s, 3H), 3.58-3.45 (m, 4H), 1.67-1.59 (m, 2H), 1.56-1.45 (m, 4H);  $^{13}\text{C}$  NMR (100 MHz,  $\text{CDCl}_3$ )  $\delta$  168.6, 168.4, 82.2, 81.1, 70.9, 68.7, 67.8, 67.3, 52.7, 52.4, 50.2, 29.7, 26.1, 24.7; HRMS (ESI):  $m/z$  calculated for  $\text{C}_{21}\text{H}_{26}\text{FeNO}_5^+$   $[\text{M}+\text{H}]^+$ : 428.1155, found: 428.1166; HPLC separation (DAICEL CHIRALPAK IA, hexane:2-propanol = 95:5, flow rate: 1.0 mL/min, detection at 254nm):  $t_{\text{R}}(\text{major}) = 20.0$  min,  $t_{\text{R}}(\text{minor}) = 16.9$  min, 85:15 er.

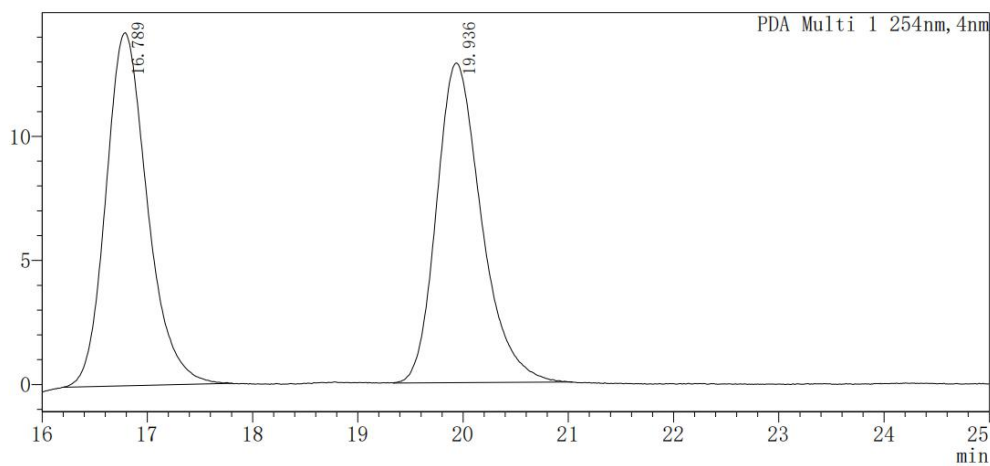

| PDA Ch1 254nm |           |        |
|---------------|-----------|--------|
| Peak No       | Ret. time | Area/% |
| 1             | 16.789    | 50.448 |
| 2             | 19.936    | 49.552 |

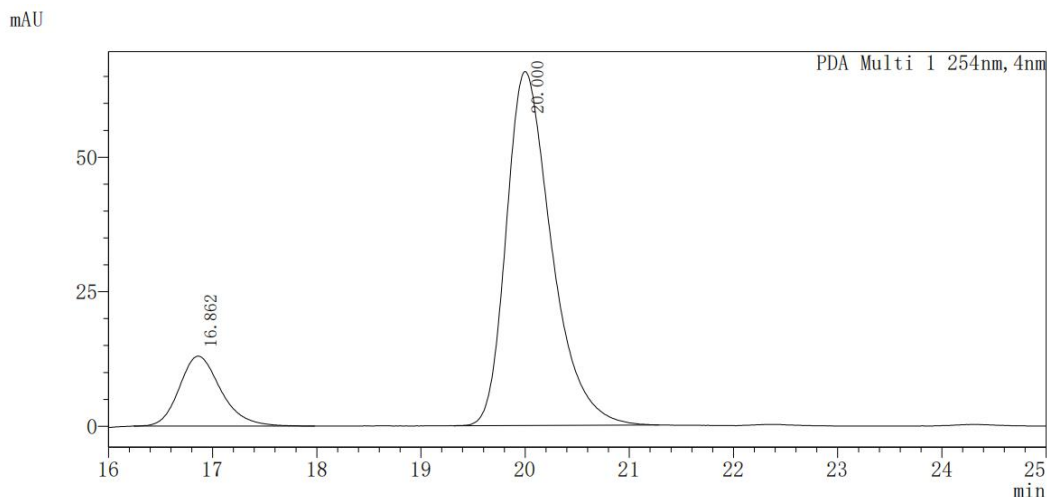

| PDA Ch1 254nm |           |        |
|---------------|-----------|--------|
| Peak No       | Ret. time | Area/% |
| 1             | 16.862    | 15.372 |
| 2             | 20.000    | 84.628 |

**(*S<sub>p</sub>*)-2-Dimethyl malonate-(azetane-1-carbonyl)ferrocene (**3fa**):**

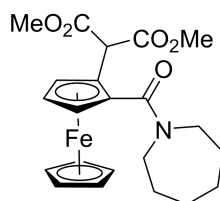

**3fa**

Compound **3fa** was prepared according to the general procedure. The crude product was purified by silica gel chromatography (petroleum ether:acetone = 8:1-4:1) to provide **3fa** (31.8 mg, 72%); Yellow solid; m.p.: 115-117 °C; IR:  $\nu$  2928, 1734, 1607, 1208, 1156, 819  $\text{cm}^{-1}$ ;  $^1\text{H}$  NMR (400 MHz,  $\text{CDCl}_3$ )  $\delta$  5.21 (s, 1H), 4.53 (s, 1H), 4.35 (s, 1H), 4.24-4.21 (m, 1H), 4.19 (s, 5H), 3.89 (s, 3H), 3.62 (s, 3H), 3.57-3.34 (m, 4H), 1.72-1.54 (m, 6H), 1.46-1.35 (m, 2H);  $^{13}\text{C}$  NMR (100 MHz,  $\text{CDCl}_3$ )  $\delta$  169.3, 168.7, 168.6, 82.5, 81.5, 70.9, 68.7, 67.5, 67.3, 52.6, 52.3, 50.3, 49.4, 46.3, 29.7, 28.2, 27.4, 26.3; HRMS (ESI):  $m/z$  calculated for  $\text{C}_{22}\text{H}_{28}\text{FeNO}_5^+$   $[\text{M}+\text{H}]^+$ : 442.1311, found: 442.1310; HPLC separation (DAICEL CHIRALPAK OD, hexane:2-propanol = 95:5, flow rate: 1.0 mL/min, detection at 254nm):  $t_{\text{R}}(\text{major}) = 17.4$  min,  $t_{\text{R}}(\text{minor}) = 25.7$  min, 85:15 er.

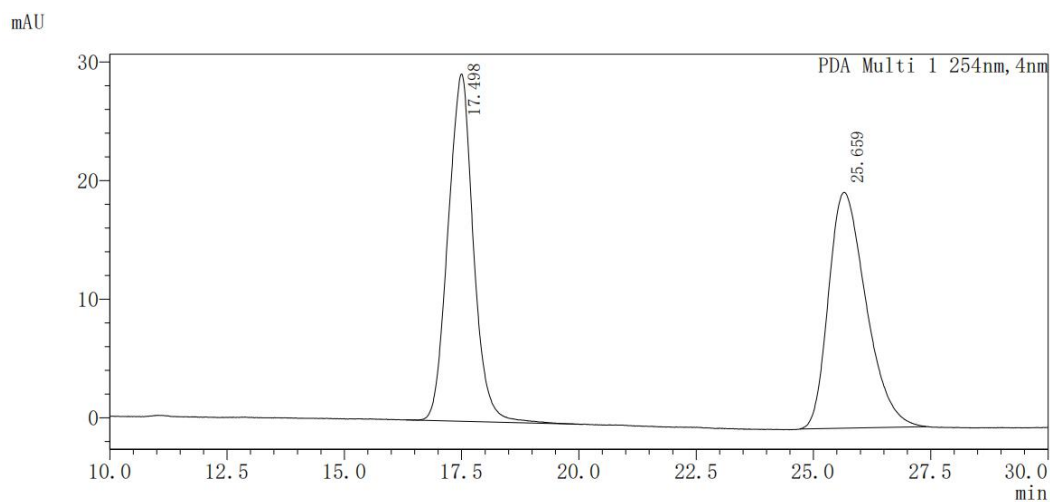

| Peak No | Ret. time | Area/% |
|---------|-----------|--------|
| 1       | 17.498    | 49.852 |
| 2       | 25.659    | 50.148 |

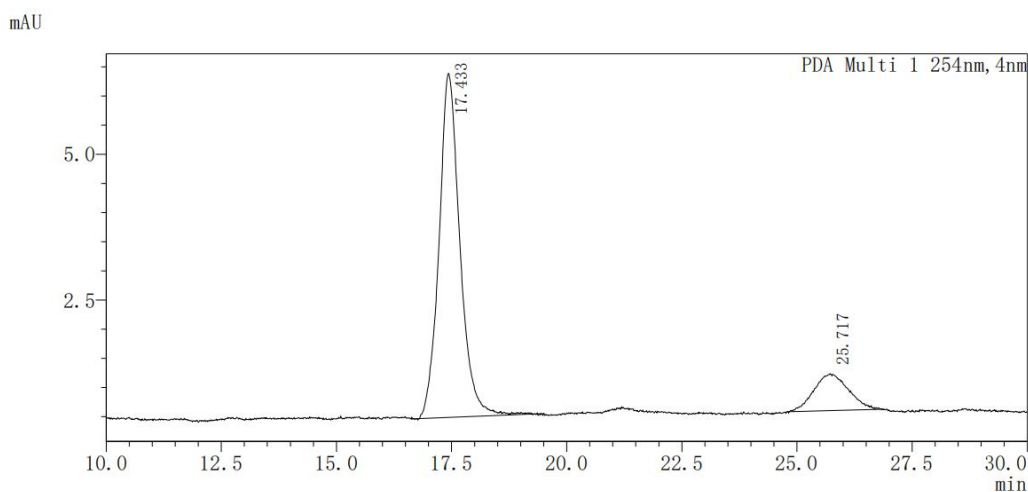

| Peak No | Ret. time | Area/% |
|---------|-----------|--------|
| 1       | 17.433    | 84.976 |
| 2       | 25.717    | 15.024 |

**(*S<sub>p</sub>*)-2-Dimethyl malonate-(morpholine-1-carbonyl)ferrocene (**3ga**):**

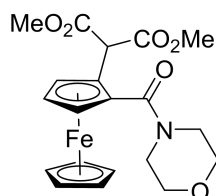

**3ga**

Compound **3ga** was prepared according to the general procedure. The crude product was purified by silica gel chromatography (petroleum ether:acetone = 8:1-4:1) to provide **3ga** (25.7 mg, 60%); Yellow solid; m.p.: 128-130 °C; IR:  $\nu$  2923, 1736, 1614, 1469, 1108, 825  $\text{cm}^{-1}$ ;  $^1\text{H}$  NMR (400 MHz,  $\text{CDCl}_3$ )  $\delta$  5.12 (s, 1H), 4.56 (s, 1H), 4.28 (s, 1H), 4.26-4.23 (m, 1H), 4.21 (s, 5H), 3.89 (s, 3H), 3.71-3.45 (m, 11H);  $^{13}\text{C}$

NMR (100 MHz, CDCl<sub>3</sub>)  $\delta$  168.9, 168.5, 168.5, 82.5, 80.2, 71.0, 68.9, 67.6, 67.5, 66.91, 52.8, 52.4, 50.2; HRMS (ESI): m/z calculated for C<sub>20</sub>H<sub>24</sub>FeNO<sub>6</sub><sup>+</sup> [M+H]<sup>+</sup>: 430.0948, found: 430.0966; HPLC separation (DAICEL CHIRALPAK IB, hexane:2-propanol = 95:5, flow rate: 1.0 mL/min, detection at 254nm): t<sub>R</sub>(major) = 24.6 min, t<sub>R</sub>(minor) = 23.4 min, 83:17 er.

mAU

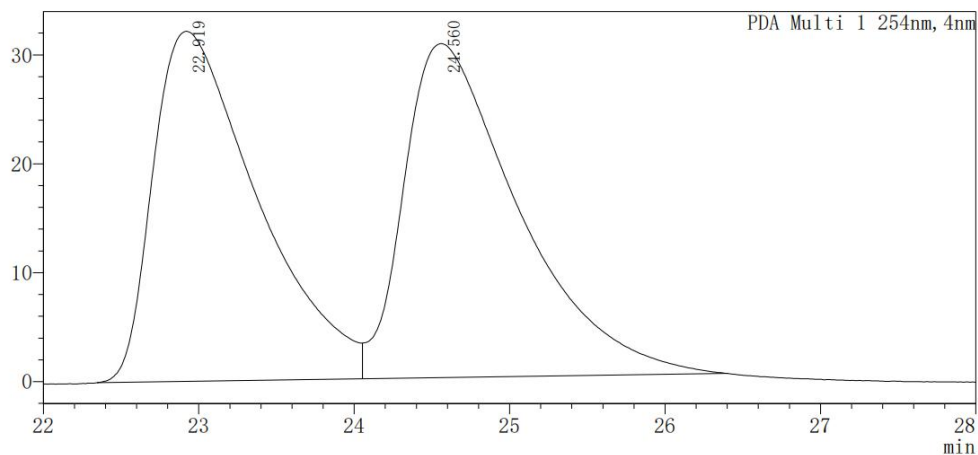

| PDA Ch1 254nm |           |        |
|---------------|-----------|--------|
| Peak No       | Ret. time | Area/% |
| 1             | 22.919    | 48.859 |
| 2             | 24.560    | 51.141 |

mAU

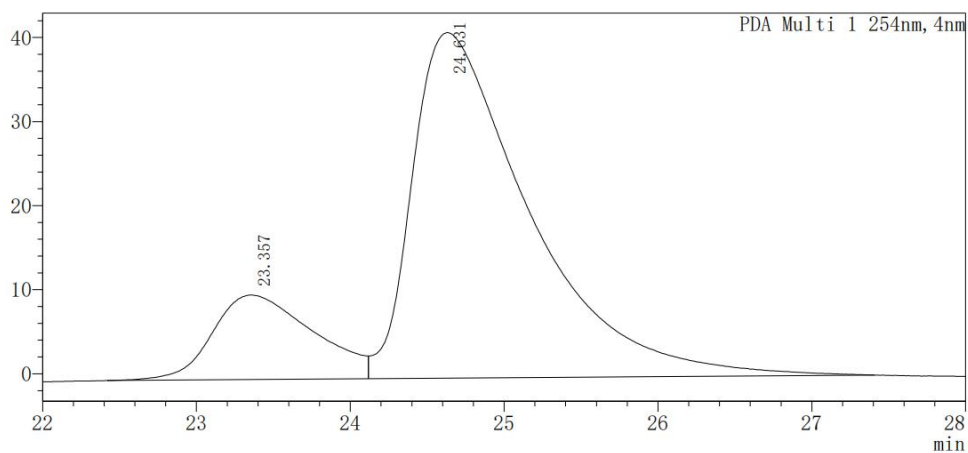

| PDA Ch1 254nm |           |        |
|---------------|-----------|--------|
| Peak No       | Ret. time | Area/% |
| 1             | 23.357    | 17.385 |
| 2             | 24.631    | 82.615 |

**(*S<sub>p</sub>*)-2-Dimethyl malonate-(4-piperidine-1-carbonyl)ferrocene (**3ha**):**

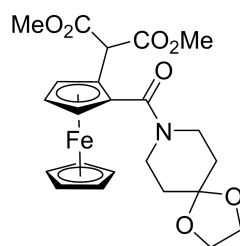

**3ha**

Compound **3ha** was prepared according to the general procedure. The crude product was purified by silica gel chromatography (petroleum ether:acetone = 8:1-4:1) to provide **3ha** (31.0 mg, 64%); Yellow solid; m.p.: 132-134 °C; IR:  $\nu$  2956, 1736, 1621, 1452, 1144, 822  $\text{cm}^{-1}$ ;  $^1\text{H}$  NMR (400 MHz,  $\text{CDCl}_3$ )  $\delta$  5.14 (s, 1H), 4.56 (s, 1H), 4.30 (s, 1H), 4.27-4.22 (m, 1H), 4.20 (s, 5H), 3.95 (s, 4H), 3.89 (s, 3H), 3.79-3.53 (m, 7H), 1.72-1.56 (m, 4H);  $^{13}\text{C}$  NMR (100 MHz,  $\text{CDCl}_3$ )  $\delta$  168.7, 168.5, 107.1, 82.5, 80.5, 70.9, 68.9, 67.7, 67.4, 64.4, 52.7, 52.4, 50.2, 47.3, 44.9, 35.2; HRMS (ESI):  $m/z$  calculated for  $\text{C}_{23}\text{H}_{28}\text{FeNO}_7^+$   $[\text{M}+\text{H}]^+$ : 486.1210, found: 486.1226; HPLC separation (DAICEL CHIRALPAK IB, hexane:2-propanol = 95:5, flow rate: 1.0 mL/min, detection at 254nm):  $t_{\text{R}}$ (major) = 18.1 min,  $t_{\text{R}}$ (minor) = 22.6 min, 82:18 er.

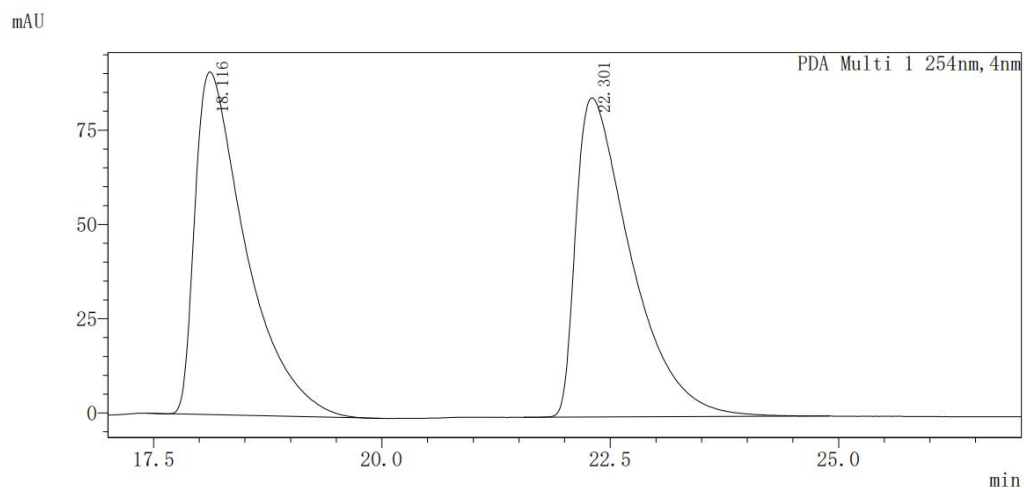

| PDA Ch1 254nm |           |        |
|---------------|-----------|--------|
| Peak No       | Ret. time | Area/% |
| 1             | 18.116    | 49.744 |
| 2             | 22.301    | 50.256 |



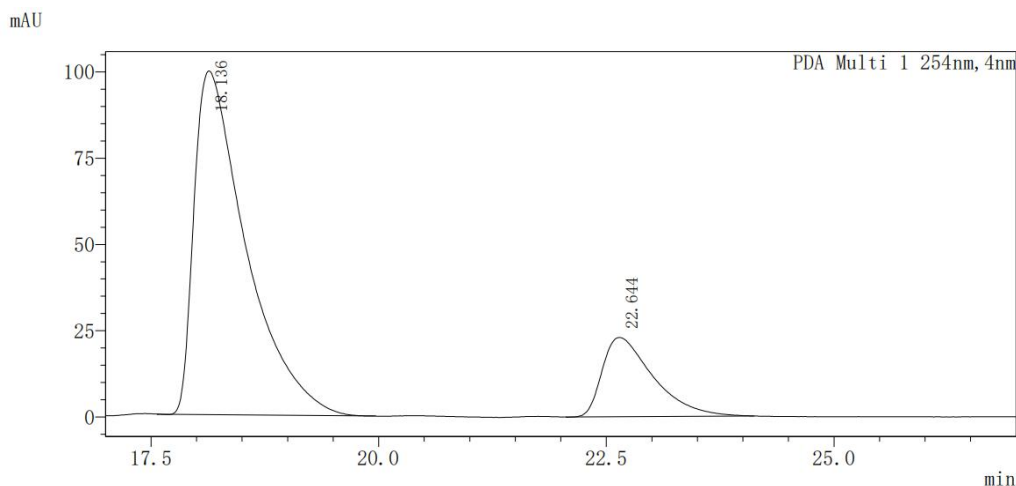

| Peak No | Ret. time | Area/% |
|---------|-----------|--------|
| 1       | 18.136    | 81.565 |
| 2       | 22.644    | 18.435 |

**(*S<sub>p</sub>*)-2-Dimethyl malonate-(dimethyl-1-carbonyl)-1'-isopropyl-ferrocene (**3ia**):**

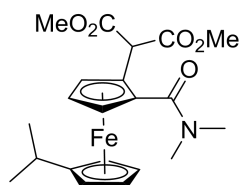

**3ia**

Compound **3ia** was prepared according to the general procedure. The crude product was purified by silica gel chromatography (petroleum ether:acetone = 8:1-4:1) to provide **3ia** (33.9 mg, 79%); Yellow solid; m.p.: 102-104 °C; IR:  $\nu$  2958, 1741, 1621, 1435, 1261, 831  $\text{cm}^{-1}$ ;  $^1\text{H}$  NMR (500 MHz,  $\text{CDCl}_3$ )  $\delta$  5.24 (s, 1H), 4.52 (s, 1H), 4.30 (s, 1H), 4.22-4.07 (m, 4H), 4.02 (s, 1H), 3.88 (s, 3H), 3.62 (s, 3H), 2.99 (s, 6H), 2.51-2.60 (m, 1H), 1.10 (d,  $J = 6.9$  Hz, 6H);  $^{13}\text{C}$  NMR (125 MHz,  $\text{CDCl}_3$ )  $\delta$  170.2, 168.7, 98.4, 82.2, 80.0, 71.3, 70.6, 69.5, 69.1, 68.9, 68.4, 67.6, 52.6, 52.3, 50.2, 39.2, 35.7, 27.0, 23.6, 23.5; HRMS (ESI):  $m/z$  calculated for  $\text{C}_{21}\text{H}_{28}\text{FeNO}_5^+$   $[\text{M}+\text{H}]^+$ : 430.1311, found: 430.1321; HPLC separation (DAICEL CHIRALPAK AD, hexane:2-propanol = 95:5, flow rate: 1.0 mL/min, detection at 254nm):  $t_{\text{R}}$ (major) = 20.0 min,  $t_{\text{R}}$ (minor) = 18.5 min, 89:11 er.

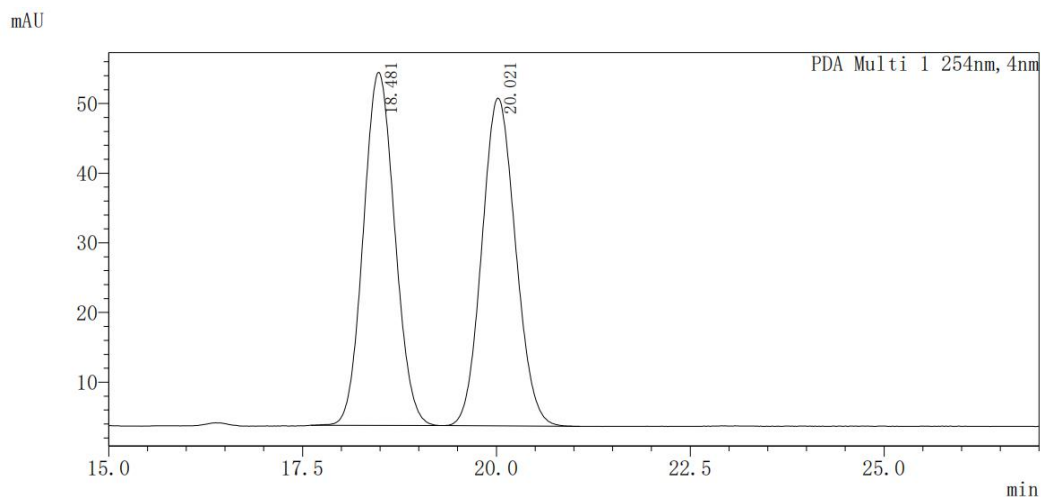

| PDA Ch1 254nm |           |        |
|---------------|-----------|--------|
| Peak No       | Ret. time | Area/% |
| 1             | 18.481    | 50.111 |
| 2             | 20.021    | 49.889 |

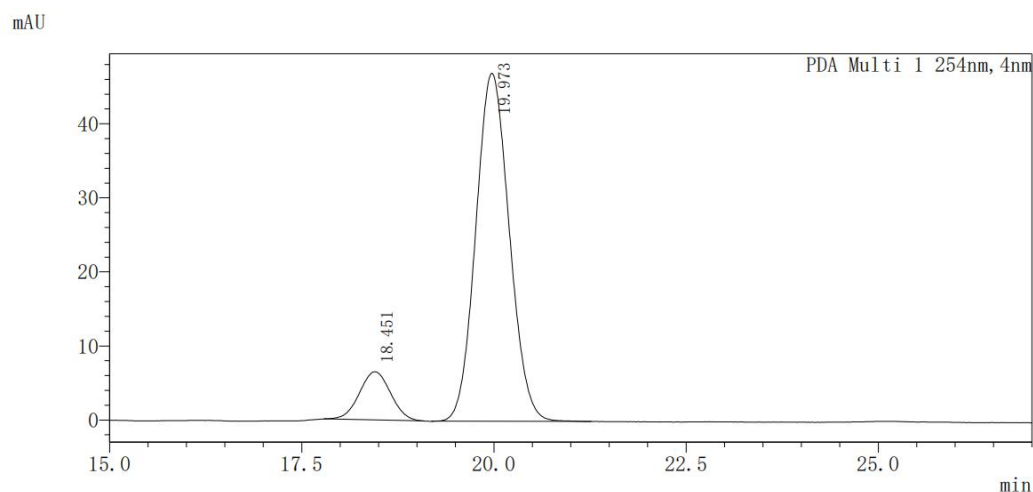

| PDA Ch1 254nm |           |        |
|---------------|-----------|--------|
| Peak No       | Ret. time | Area/% |
| 1             | 18.451    | 11.443 |
| 2             | 19.973    | 88.557 |

**(*S<sub>p</sub>*)-2-Dimethyl malonate-(dimethyl-1-carbonyl)-1'-pentan-3-yl-ferrocene (**3ja**):**

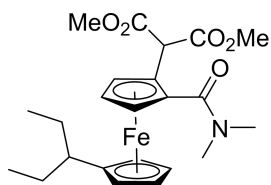

**3ja**

Compound **3ja** was prepared according to the general procedure. The crude product was purified by silica gel chromatography (petroleum ether:acetone = 8:1-4:1) to provide **3ja** (34.7 mg, 76%); Yellow solid; m.p.: 107-109 °C; IR:  $\nu$  2961, 1743, 1600, 1436, 1260, 1108, 835  $\text{cm}^{-1}$ ;  $^1\text{H}$  NMR (500 MHz,  $\text{CDCl}_3$ )  $\delta$  5.24 (s, 1H), 4.50 (s, 1H), 4.28 (s, 1H), 4.19-4.12 (m, 2H), 4.12-4.04 (m, 2H), 3.98 (s, 1H), 3.88 (s, 3H), 3.62 (s, 3H), 2.99 (s, 6H), 2.19-2.08 (m, 1H), 1.58-1.41 (m, 4H), 0.86-0.74 (m, 6H);

$^{13}\text{C}$  NMR (125 MHz,  $\text{CDCl}_3$ )  $\delta$  170.2, 168.8, 96.7, 82.2, 79.8, 71.0, 70.4, 70.4, 69.3, 69.1, 68.6, 68.6, 52.6, 52.3, 50.3, 40.0, 39.3, 35.7, 26.6, 26.5, 11.3, 11.2; HRMS (ESI):  $m/z$  calculated for  $\text{C}_{23}\text{H}_{32}\text{FeNO}_5^+$   $[\text{M}+\text{H}]^+$ : 458.1624, found: 458.1623; HPLC separation (DAICEL CHIRALPAK IB, hexane:2-propanol = 95:5, flow rate: 1.0 mL/min, detection at 254nm):  $t_{\text{R}}(\text{major}) = 9.1$  min,  $t_{\text{R}}(\text{minor}) = 18.0$  min, 90:10 er.

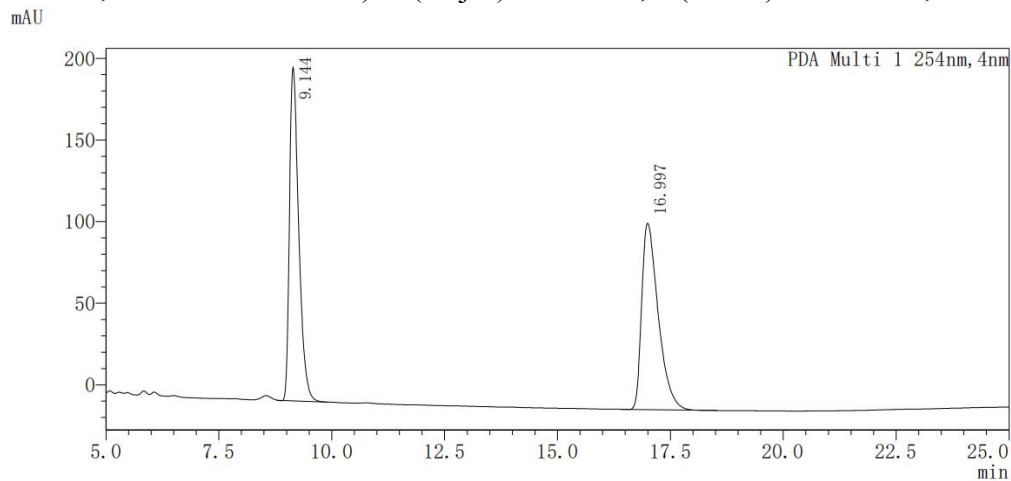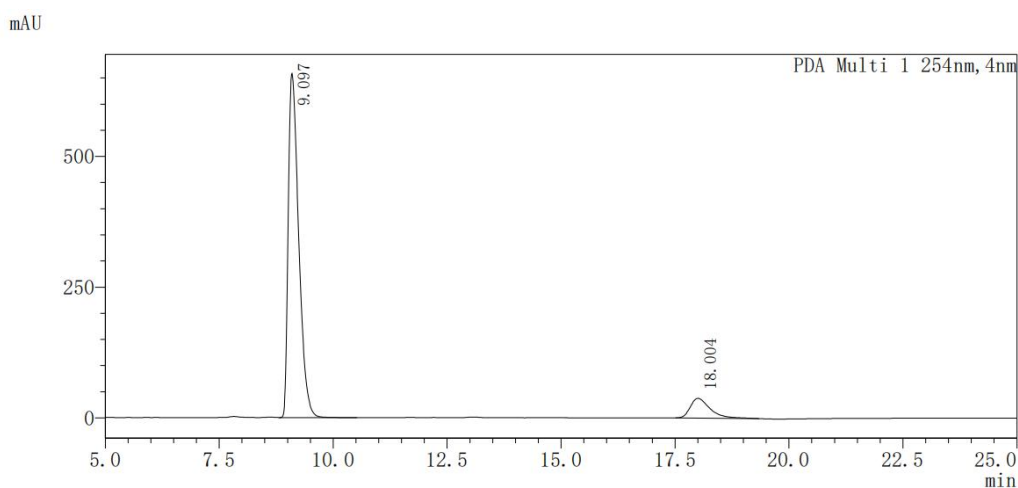

**(*S<sub>p</sub>*)-2-Dimethyl malonate-(dimethyl-1-carbonyl)-1'-tertbutyl-ferrocene (3ka):**

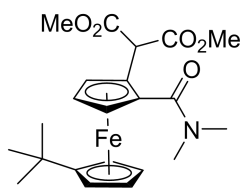

**3ka**

Compound **3ka** was prepared according to the general procedure. The crude product was purified by silica gel chromatography (petroleum ether:acetone = 8:1-4:1)

to provide **3ka** (37.2 mg, 84%); Yellow solid; m.p.: 110-112 °C; IR:  $\nu$  2924, 1737, 1620, 1434, 1259, 832  $\text{cm}^{-1}$ ;  $^1\text{H}$  NMR (500 MHz,  $\text{CDCl}_3$ )  $\delta$  5.25 (s, 1H), 4.55 (s, 1H), 4.36 (s, 1H), 4.24 (s, 1H), 4.20 (s, 1H), 4.17 (s, 1H), 4.11 (s, 1H), 3.97 (s, 1H), 3.89 (s, 3H), 3.63 (s, 3H), 3.00 (s, 6H), 1.17 (s, 9H);  $^{13}\text{C}$  NMR (125 MHz,  $\text{CDCl}_3$ )  $\delta$  170.3, 168.7, 103.2, 82.1, 80.0, 72.0, 70.9, 68.8, 68.6, 68.3, 66.5, 52.7, 52.3, 50.2, 31.4, 30.3; HRMS (ESI):  $m/z$  calculated for  $\text{C}_{22}\text{H}_{30}\text{FeNO}_5^+$   $[\text{M}+\text{H}]^+$ : 444.1468, found: 444.1471; HPLC separation (DAICEL CHIRALPAK OD, hexane:2-propanol = 95:5, flow rate: 1.0 mL/min, detection at 220nm):  $t_{\text{R}}(\text{major}) = 11.9$  min,  $t_{\text{R}}(\text{minor}) = 16.8$  min, 94:6 er.

mAU

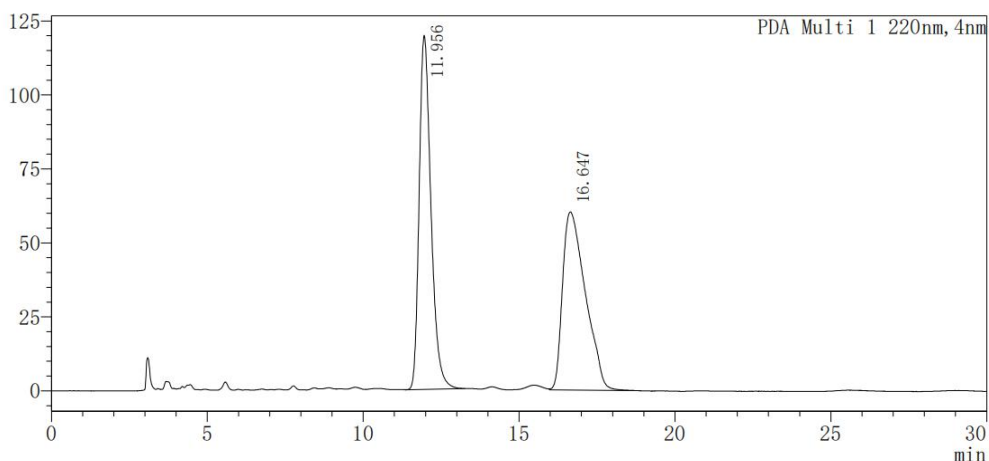

PDA Ch1 220nm

| Peak No | Ret. time | Area/% |
|---------|-----------|--------|
| 1       | 11.956    | 50.592 |
| 2       | 16.647    | 49.408 |

mAU

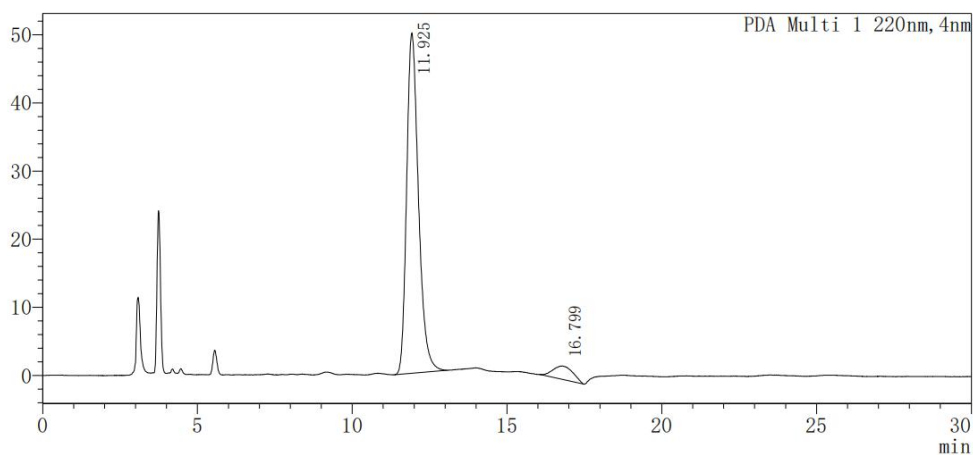

PDA Ch1 220nm

| Peak No | Ret. time | Area/% |
|---------|-----------|--------|
| 1       | 11.925    | 93.770 |
| 2       | 16.799    | 6.230  |

**(*S<sub>p</sub>*)-2-Dimethyl malonate-(dimethyl-1-carbonyl)-1'-isopropyl-ferrocene (**3la**):**

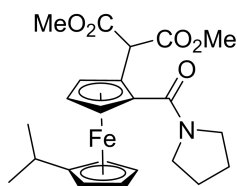

**3la**

Compound **3la** was prepared according to the general procedure. The crude product was purified by silica gel chromatography (petroleum ether:acetone = 8:1-4:1) to provide **3la** (34.1 mg, 75%); Yellow solid; m.p.: 116-118 °C; IR:  $\nu$  2956, 1736, 1603, 1456, 1215, 835  $\text{cm}^{-1}$ ;  $^1\text{H}$  NMR (500 MHz,  $\text{CDCl}_3$ )  $\delta$  5.45 (s, 1H), 4.49 (s, 1H), 4.40 (s, 1H), 4.21 (s, 1H), 4.16-4.06 (m, 3H), 4.03 (s, 1H), 3.88 (s, 3H), 3.62 (s, 3H), 3.56-3.43 (m, 4H), 2.59-2.51 (m, 1H), 1.96-1.74 (m, 4H), 1.10 (d,  $J = 6.8$  Hz, 6H);  $^{13}\text{C}$  NMR (125 MHz,  $\text{CDCl}_3$ )  $\delta$  169.0, 168.9, 98.3, 82.4, 79.0, 70.9, 70.5, 69.6, 69.2, 68.9, 68.8, 67.7, 52.6, 52.3, 50.6, 48.9, 46.4, 27.0, 26.6, 24.2, 23.6, 23.5; HRMS (ESI):  $m/z$  calculated for  $\text{C}_{23}\text{H}_{30}\text{FeNO}_5^+$   $[\text{M}+\text{H}]^+$ : 456.1468, found: 456.1475; HPLC separation (DAICEL CHIRALPAK IA, hexane:2-propanol = 95:5, flow rate: 1.0 mL/min, detection at 254nm):  $t_{\text{R}}(\text{major}) = 22.4$  min,  $t_{\text{R}}(\text{minor}) = 19.5$  min, 91:9 er.

mAU

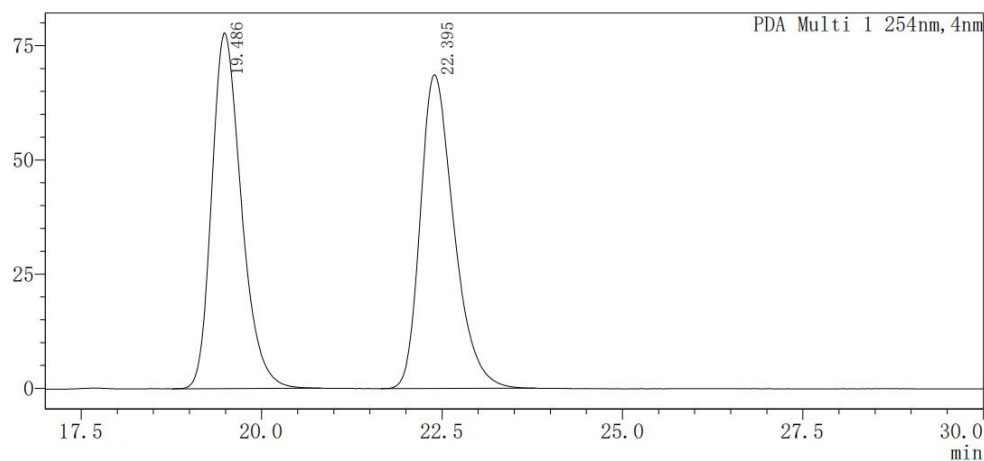

| PDA Ch1 254nm |           |        |
|---------------|-----------|--------|
| Peak No       | Ret. time | Area/% |
| 1             | 19.486    | 50.024 |
| 2             | 22.395    | 49.976 |

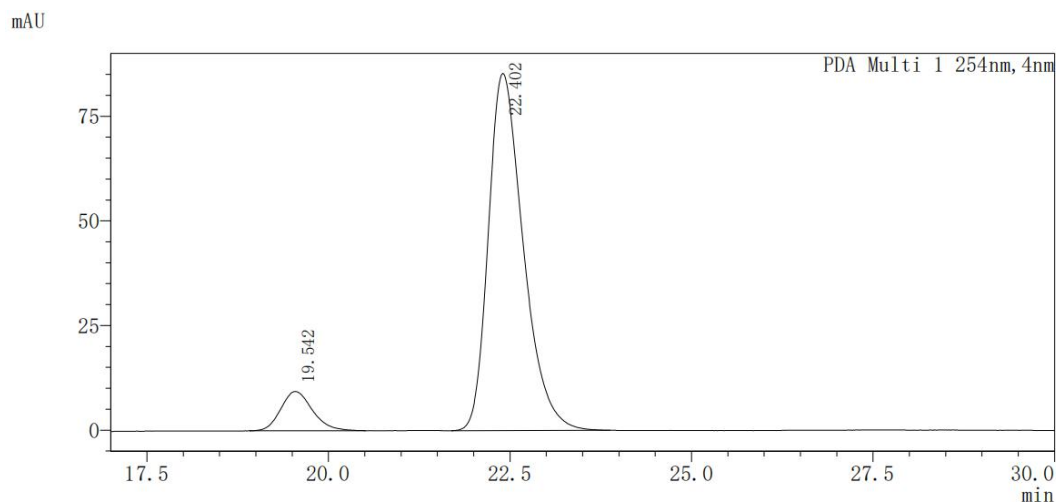

| PDA Ch1 254nm |           |        |
|---------------|-----------|--------|
| Peak No       | Ret. time | Area/% |
| 1             | 19.542    | 9.065  |
| 2             | 22.402    | 90.935 |

**(*S<sub>p</sub>*)-2-Dimethyl malonate-(dimethyl-1-carbonyl)-1'-pentan-3-yl-ferrocene (**3ma**):**

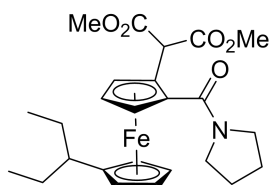

**3ma**

Compound **3ma** was prepared according to the general procedure. The crude product was purified by silica gel chromatography (petroleum ether:acetone = 8:1-4:1) to provide **3ma** (34.8 mg, 72%); Yellow solid; m.p.: 119-121 °C; IR:  $\nu$  2959, 1737, 1604, 1456, 1251, 835  $\text{cm}^{-1}$ ;  $^1\text{H}$  NMR (500 MHz,  $\text{CDCl}_3$ )  $\delta$  5.47 (s, 1H), 4.49 (s, 1H), 4.39 (s, 1H), 4.18 (s, 1H), 4.13-4.05 (m, 3H), 3.99 (s, 1H), 3.88 (s, 3H), 3.63 (s, 3H), 3.58-3.43 (m, 4H), 2.17-2.12 (m, 1H), 1.93-1.76 (m, 4H), 1.59-1.41 (m, 4H), 0.85-0.76 (m, 6H);  $^{13}\text{C}$  NMR (125 MHz,  $\text{CDCl}_3$ )  $\delta$  169.0, 168.9, 96.7, 82.4, 78.8, 70.6, 70.2, 70.1, 69.7, 69.1, 68.9, 68.7, 52.6, 52.3, 50.7, 48.9, 46.4, 39.9, 26.6, 26.5, 24.2, 11.3, 11.2; HRMS (ESI):  $m/z$  calculated for  $\text{C}_{25}\text{H}_{34}\text{FeNO}_5$   $[\text{M}+\text{H}]^+$ : 484.1781, found: 484.1783; HPLC separation (DAICEL CHIRALPAK IG, hexane:2-propanol = 95:5, flow rate: 1.0 mL/min, detection at 220nm):  $t_{\text{R}}$ (major) = 18.2 min,  $t_{\text{R}}$ (minor) = 16.6 min, 93:7 er.

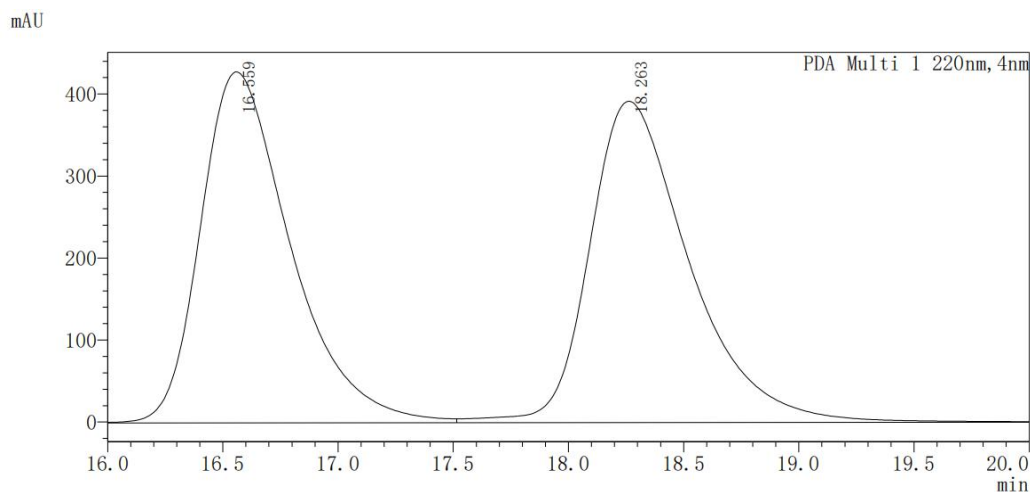

| PDA Ch1 220nm |           |        |
|---------------|-----------|--------|
| Peak No       | Ret. time | Area/% |
| 1             | 16.559    | 49.557 |
| 2             | 18.263    | 50.443 |

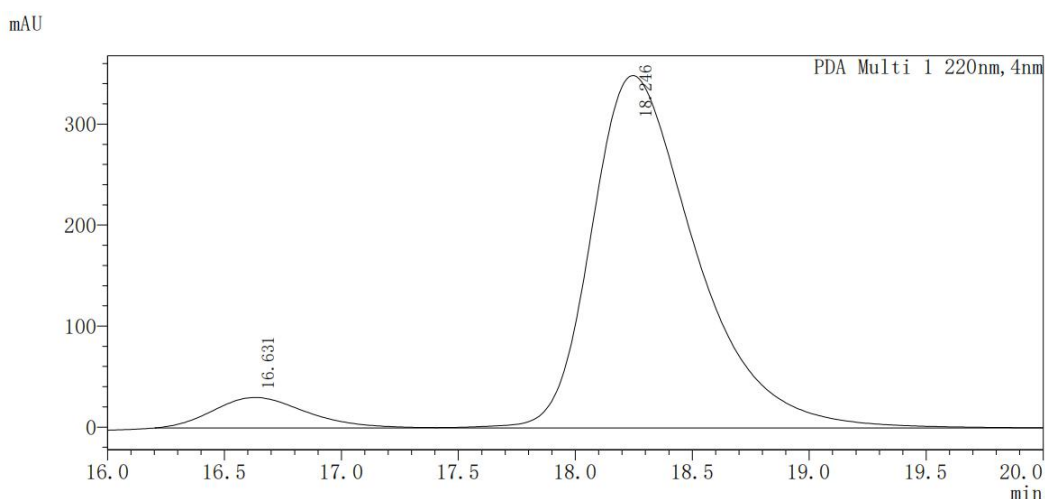

| PDA Ch1 220nm |           |        |
|---------------|-----------|--------|
| Peak No       | Ret. time | Area/% |
| 1             | 16.631    | 7.173  |
| 2             | 18.246    | 92.827 |

**(*S<sub>p</sub>*)-2-Diethyl malonate-(dimethyl-1-carbonyl)ferrocene (**3ab**):**

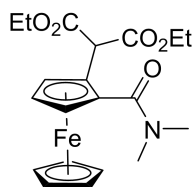

**3ab**

Compound **3ab** was prepared according to the general procedure. The crude product was purified by silica gel chromatography (petroleum ether:acetone = 8:1-4:1) to provide **3ab** (34.0 mg, 82%); Yellow solid; m.p.: 92-94 °C; IR:  $\nu$  2925, 1737, 1626, 1463, 1214, 801  $\text{cm}^{-1}$ ;  $^1\text{H}$  NMR (500 MHz,  $\text{CDCl}_3$ )  $\delta$  5.16 (s, 1H), 4.58 (s, 1H), 4.41-4.30 (m, 3H), 4.26-4.23 (m, 1H), 4.22 (s, 5H), 4.15-4.01 (m, 2H), 3.00 (s, 6H), 1.40 (t,  $J = 7.1$  Hz, 3H), 1.18 (t,  $J = 7.1$  Hz, 3H);  $^{13}\text{C}$  NMR (125 MHz,  $\text{CDCl}_3$ )  $\delta$

170.0, 168.3, 168.2, 82.4, 80.7, 70.8, 68.7, 68.0, 67.2, 61.5, 61.3, 50.7, 14.2, 14.0;  
 HRMS (ESI):  $m/z$  calculated for  $C_{20}H_{26}FeNO_5^+$   $[M+H]^+$ : 416.1155, found: 416.1160;  
 HPLC separation (DAICEL CHIRALPAK IA, hexane:2-propanol = 95:5, flow rate:  
 1.0 mL/min, detection at 220nm):  $t_R$ (major) = 18.1 min,  $t_R$ (minor) = 16.6 min, 91:9 er.

mAU

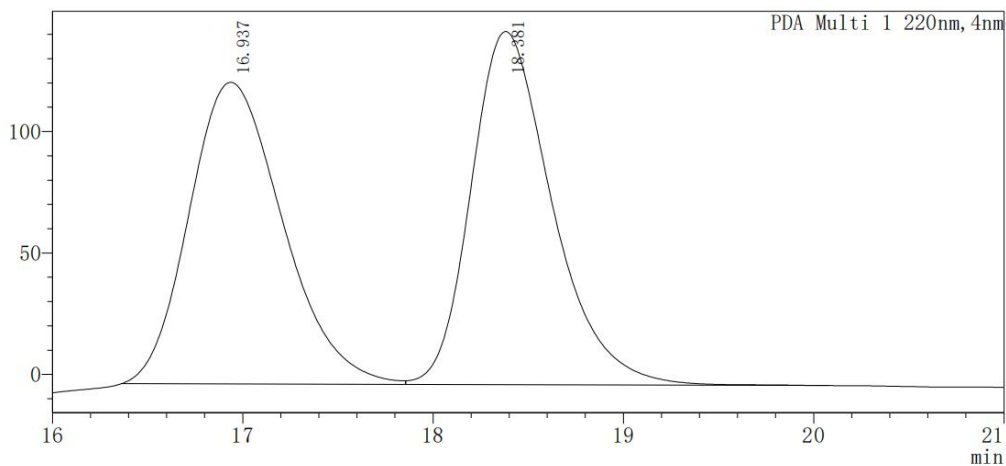

| PDA Ch1 220nm |           |        |
|---------------|-----------|--------|
| Peak No       | Ret. time | Area/% |
| 1             | 16.937    | 49.608 |
| 2             | 18.381    | 50.392 |

mAU

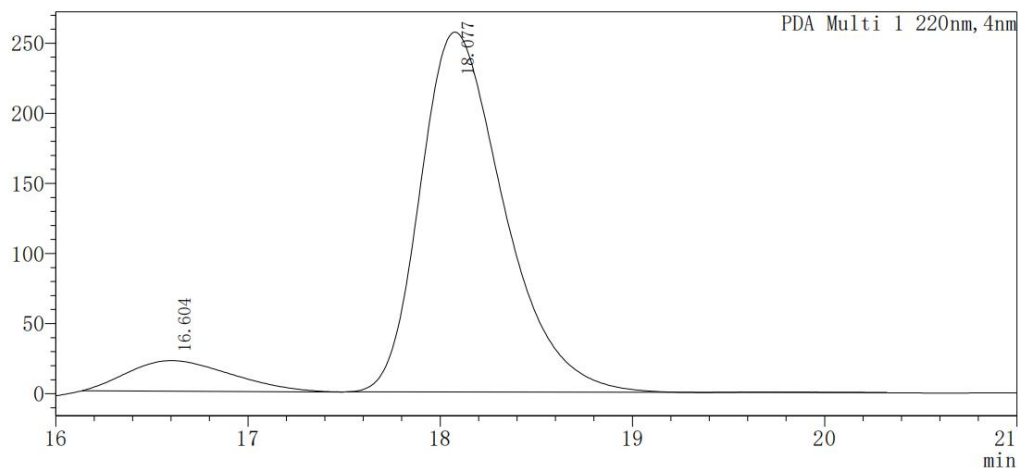

| PDA Ch1 220nm |           |        |
|---------------|-----------|--------|
| Peak No       | Ret. time | Area/% |
| 1             | 16.604    | 9.457  |
| 2             | 18.077    | 90.543 |

**(*S<sub>p</sub>*)-2-Dipropyl malonate-(dimethyl-1-carbonyl)ferrocene (**3ac**):**

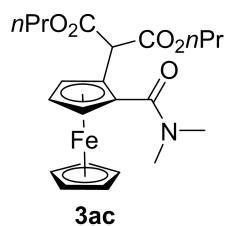

Compound **3ac** was prepared according to the general procedure. The crude product was purified by silica gel chromatography (petroleum ether:acetone = 8:1-4:1)



to provide **3ac** (35.0 mg, 79%); Yellow solid; m.p.: 87-89 °C; IR:  $\nu$  2968, 1733, 1624, 1460, 1275, 1058, 822  $\text{cm}^{-1}$ ;  $^1\text{H}$  NMR (400 MHz,  $\text{CDCl}_3$ )  $\delta$  5.17 (s, 1H), 4.57 (s, 1H), 4.34 (s, 1H), 4.28-4.06 (m, 8H), 4.05-3.86 (m, 2H), 2.98 (s, 6H), 1.87-1.70 (m, 2H), 1.62-1.45 (m, 2H), 1.02 (t,  $J = 7.2$  Hz, 3H), 0.84 (t,  $J = 7.2$  Hz, 3H);  $^{13}\text{C}$  NMR (100 MHz,  $\text{CDCl}_3$ )  $\delta$  170.0, 168.4, 168.3, 82.5, 80.7, 70.8, 68.8, 68.0, 67.3, 67.0, 67.0, 50.6, 22.0, 21.8, 10.5, 10.2; HRMS (ESI):  $m/z$  calculated for  $\text{C}_{22}\text{H}_{30}\text{FeNO}_5^+$   $[\text{M}+\text{H}]^+$ : 444.1468, found: 444.1469; HPLC separation (DAICEL CHIRALPAK IA, hexane:2-propanol = 98:2, flow rate: 1.0 mL/min, detection at 254nm):  $t_{\text{R}}$ (major) = 26.7 min,  $t_{\text{R}}$ (minor) = 23.0 min, 92:8 er.

mAU

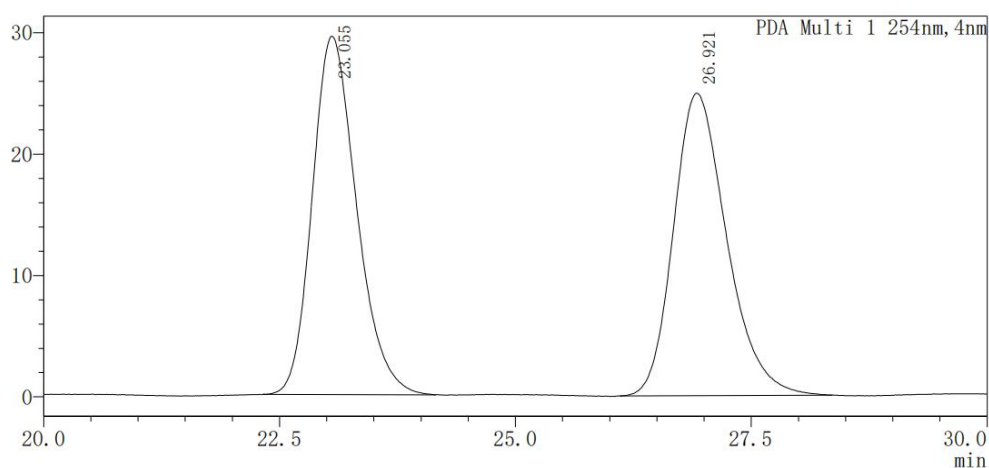

| PDA Ch1 254nm |           |        |
|---------------|-----------|--------|
| Peak No       | Ret. time | Area/% |
| 1             | 23.055    | 49.664 |
| 2             | 26.921    | 50.336 |

mAU

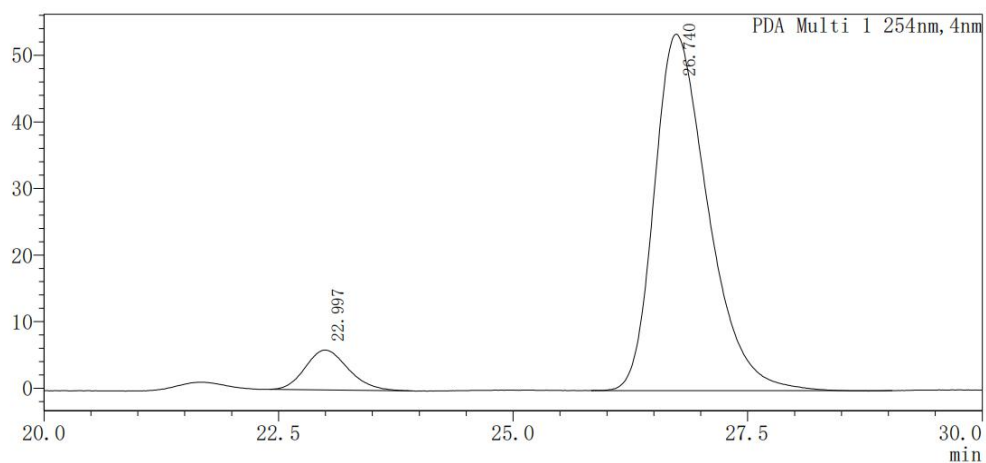

| PDA Ch1 254nm |           |        |
|---------------|-----------|--------|
| Peak No       | Ret. time | Area/% |
| 1             | 22.997    | 8.212  |
| 2             | 26.740    | 91.788 |

**(*S<sub>p</sub>*)-2-Diisopropyl malonate-(dimethyl-1-carbonyl)ferrocene (**3ad**):**

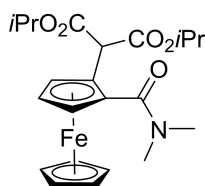

**3ad**

Compound **3ad** was prepared according to the general procedure. The crude product was purified by silica gel chromatography (petroleum ether:acetone = 8:1-4:1) to provide **3ad** (31.9 mg, 72%); Yellow solid; m.p.: 84-86 °C; IR:  $\nu$  2981, 1727, 1625, 1456, 1277, 1102, 818  $\text{cm}^{-1}$ ;  $^1\text{H}$  NMR (500 MHz,  $\text{CDCl}_3$ )  $\delta$  5.25-5.17 (m, 1H), 5.10 (s, 1H), 4.95-4.88 (m, 1H), 4.58 (s, 1H), 4.34 (s, 1H), 4.24-4.19 (m, 6H), 2.99 (s, 6H), 1.40-1.35 (m, 6H), 1.19-1.11 (m, 6H);  $^{13}\text{C}$  NMR (125 MHz,  $\text{CDCl}_3$ )  $\delta$  169.9, 167.9, 167.6, 82.5, 81.0, 70.8, 69.0, 68.9, 68.6, 67.9, 67.1, 51.1, 25.4, 21.8, 21.6, 21.5; HRMS (ESI):  $m/z$  calculated for  $\text{C}_{22}\text{H}_{30}\text{FeNO}_5^+$   $[\text{M}+\text{H}]^+$ : 444.1468, found: 444.1473; HPLC separation (DAICEL CHIRALPAK OD, hexane:2-propanol = 95:5, flow rate: 1.0 mL/min, detection at 254nm):  $t_{\text{R}}$ (major) = 8.0 min,  $t_{\text{R}}$ (minor) = 16.4 min, 89:11 er.

mAU

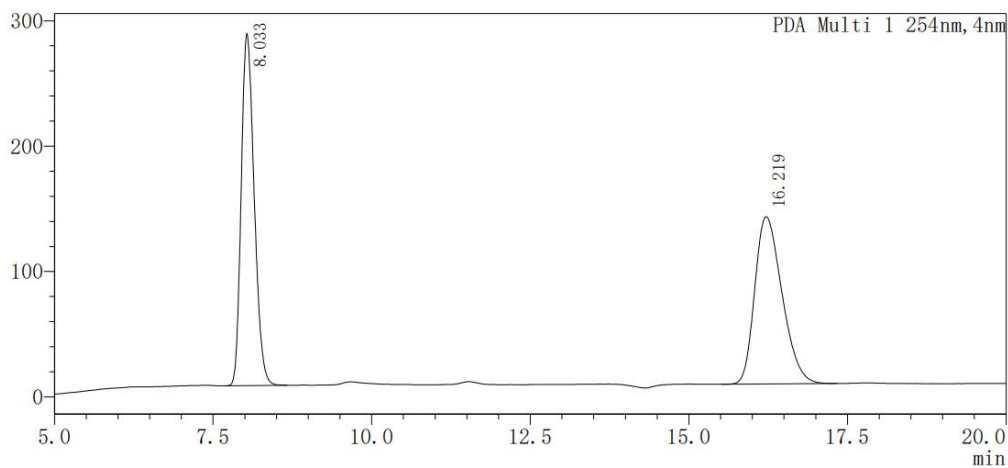

PDA Ch1 254nm

| Peak No | Ret. time | Area/% |
|---------|-----------|--------|
| 1       | 8.033     | 50.039 |
| 2       | 16.219    | 49.961 |

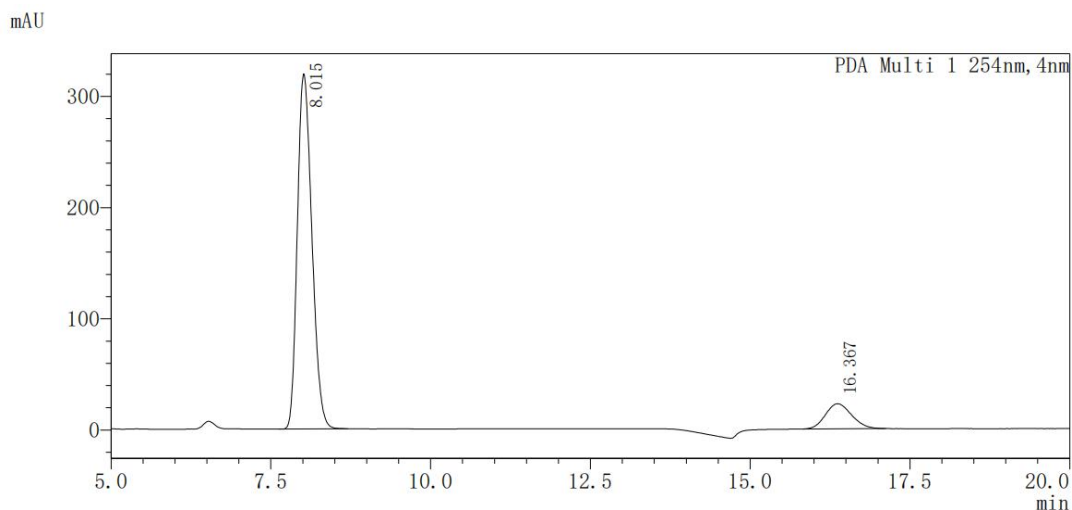

| PDA Ch1 254nm |           |        |
|---------------|-----------|--------|
| Peak No       | Ret. time | Area/% |
| 1             | 8.015     | 88.736 |
| 2             | 16.367    | 11.264 |

**(*S<sub>p</sub>*)-2-Dibutyl malonate-(dimethyl-1-carbonyl)ferrocene (**3ae**):**

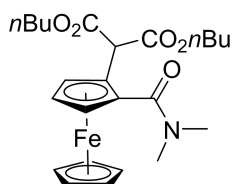

**3ae**

Compound **3ae** was prepared according to the general procedure. The crude product was purified by silica gel chromatography (petroleum ether:acetone = 8:1-4:1) to provide **3ae** (36.3 mg, 77%); Yellow solid; m.p.: 86-88 °C; IR:  $\nu$  2960, 1732, 1627, 1459, 1277, 1062, 821  $\text{cm}^{-1}$ ;  $^1\text{H}$  NMR (500 MHz,  $\text{CDCl}_3$ )  $\delta$  5.18 (s, 1H), 4.59 (s, 1H), 4.37-4.29 (m, 2H), 4.27-4.23 (m, 2H), 4.21 (m, 5H), 4.10-3.98 (m, 2H), 3.00 (s, 6H), 1.79-1.70 (m, 2H), 1.58-1.45 (m, 4H), 1.32-1.26 (m, 2H), 0.98 (t,  $J = 7.4$  Hz, 3H), 0.88 (t,  $J = 7.4$  Hz, 3H);  $^{13}\text{C}$  NMR (125 MHz,  $\text{CDCl}_3$ )  $\delta$  170.0, 168.4, 168.3, 82.5, 80.7, 70.8, 68.8, 68.0, 67.3, 65.3, 65.2, 50.6, 30.6, 30.5, 19.2, 18.9, 13.7, 13.6; HRMS (ESI):  $m/z$  calculated for  $\text{C}_{24}\text{H}_{34}\text{FeNO}_5^+$   $[\text{M}+\text{H}]^+$ : 472.1781, found: 472.1788; HPLC separation (DAICEL CHIRALPAK AD, hexane:2-propanol = 98:2, flow rate: 1.0 mL/min, detection at 220nm):  $t_{\text{R}}$ (major) = 21.9 min,  $t_{\text{R}}$ (minor) = 12.8 min, 89:11 er.

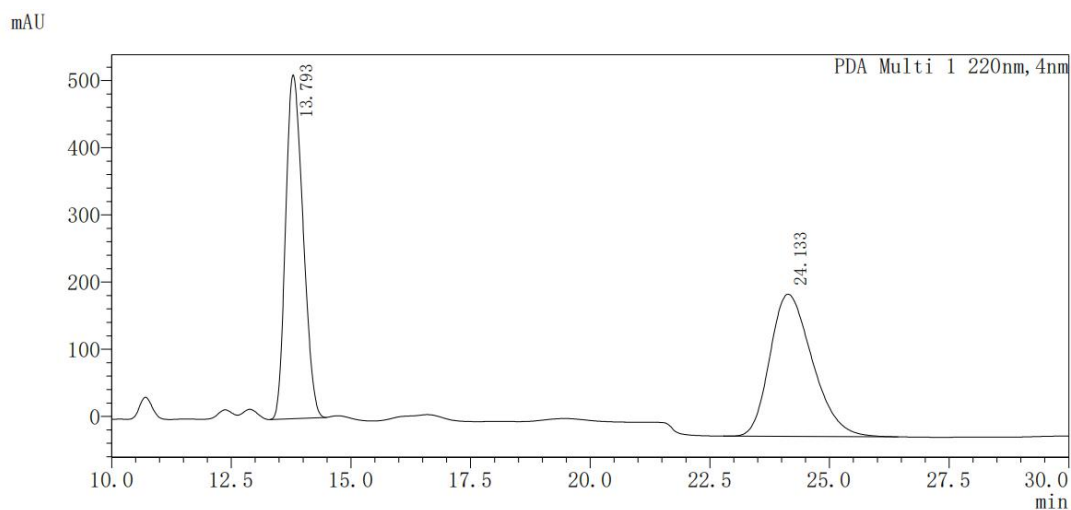

| PDA Ch1 220nm |           |        |
|---------------|-----------|--------|
| Peak No       | Ret. time | Area/% |
| 1             | 13.793    | 49.753 |
| 2             | 24.133    | 50.247 |

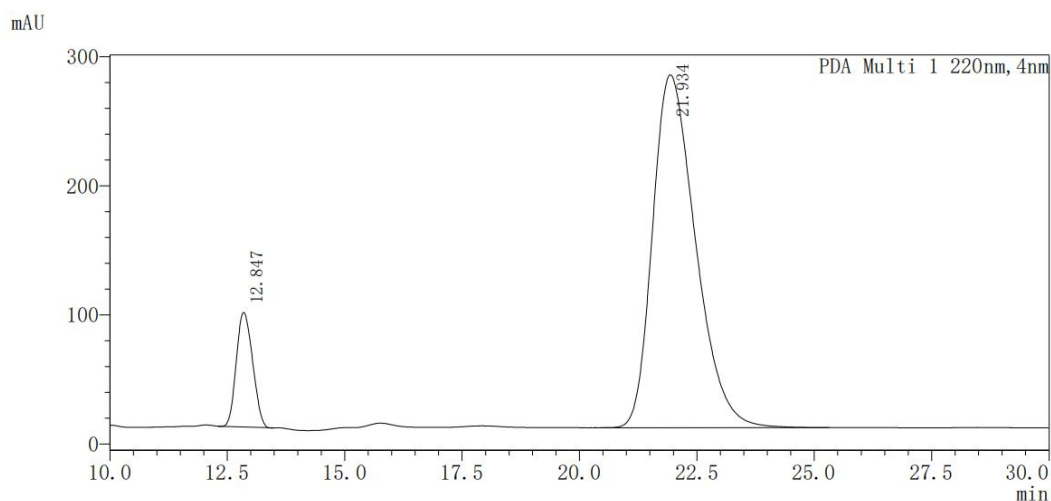

| PDA Ch1 220nm |           |        |
|---------------|-----------|--------|
| Peak No       | Ret. time | Area/% |
| 1             | 12.847    | 10.985 |
| 2             | 21.934    | 89.015 |

**(*S<sub>p</sub>*)-2-Diisobutyl malonate-(dimethyl-1-carbonyl)ferrocene (**3af**):**

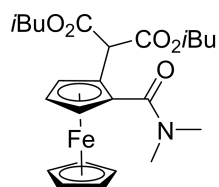

**3af**

Compound **3af** was prepared according to the general procedure. The crude product was purified by silica gel chromatography (petroleum ether:acetone = 8:1-4:1) to provide **3af** (34.4 mg, 73%); Yellow solid; m.p.: 94-96 °C; IR:  $\nu$  2961, 1734, 1626, 1470, 1277, 1004, 823  $\text{cm}^{-1}$ ;  $^1\text{H}$  NMR (500 MHz,  $\text{CDCl}_3$ )  $\delta$  5.22 (s, 1H), 4.61 (s, 1H), 4.37-4.34 (m, 1H), 4.26-4.23 (m, 1H), 4.21 (s, 5H), 4.17-4.12 (m, 1H), 4.02-3.96 (m,

1H), 3.86-3.76 (m, 2H), 2.99 (s, 6H), 2.12-2.01 (m, 1H), 1.90-1.78 (m, 1H), 1.06-1.00 (m, 6H), 0.88-0.81 (m, 6H); <sup>13</sup>C NMR (125 MHz, CDCl<sub>3</sub>) δ 170.0, 168.3, 82.5, 80.7, 71.6, 71.5, 70.8, 68.9, 68.0, 67.3, 50.5, 27.8, 27.7, 19.2, 18.9; HRMS (ESI): m/z calculated for C<sub>24</sub>H<sub>34</sub>FeNO<sub>5</sub><sup>+</sup> [M+H]<sup>+</sup>: 472.1781, found: 472.1794; HPLC separation (DAICEL CHIRALPAK IA, hexane:2-propanol = 98:2, flow rate: 1.0 mL/min, detection at 254nm): t<sub>R</sub>(major) = 21.3 min, t<sub>R</sub>(minor) = 17.6 min, 85:15 er.

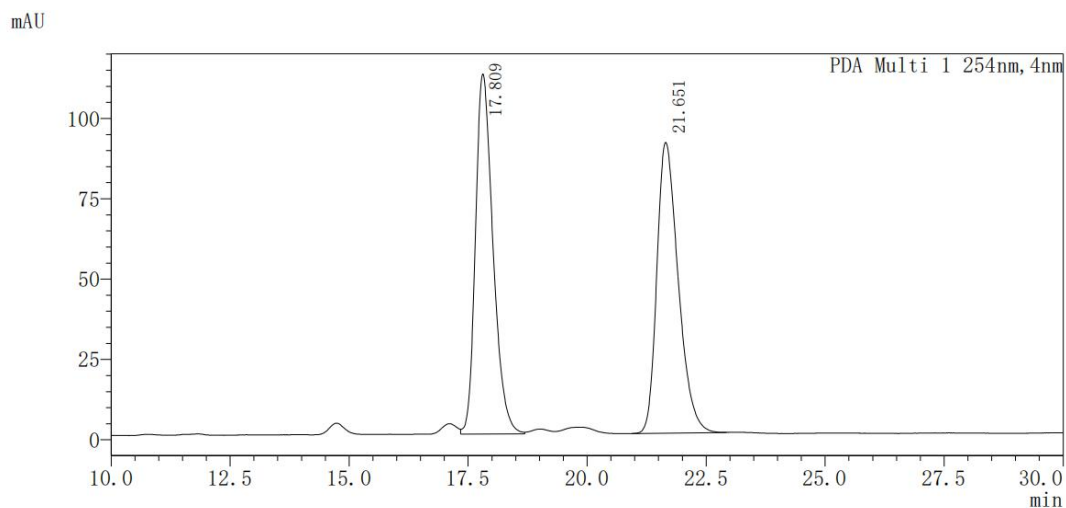

| PDA Ch1 254nm |           |        |
|---------------|-----------|--------|
| Peak No       | Ret. time | Area/% |
| 1             | 17.809    | 50.418 |
| 2             | 21.651    | 49.582 |

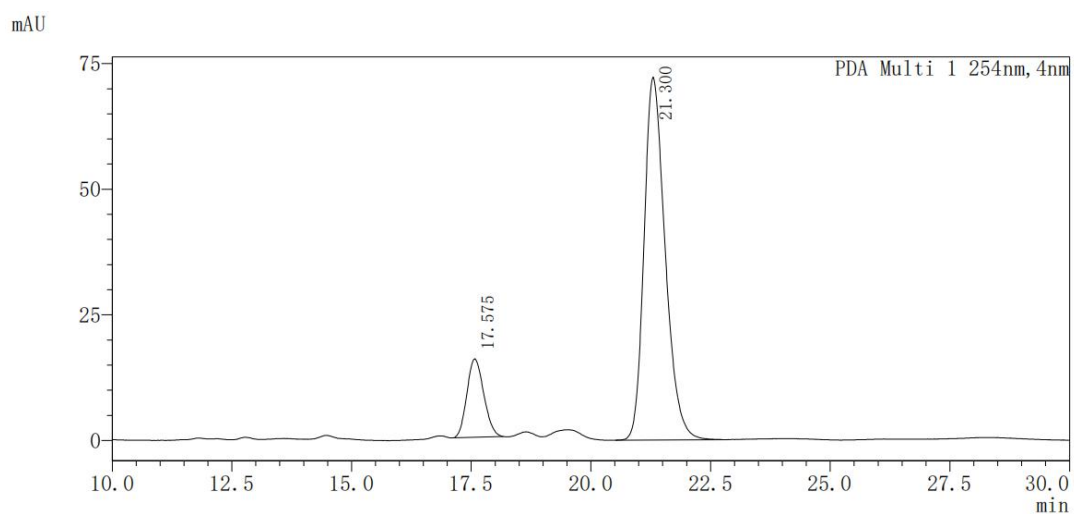

| PDA Ch1 254nm |           |        |
|---------------|-----------|--------|
| Peak No       | Ret. time | Area/% |
| 1             | 17.575    | 14.721 |
| 2             | 21.300    | 85.279 |

**(*S<sub>p</sub>*)-2-Ditrifluoroethyl malonate-(dimethyl-1-carbonyl)ferrocene (**3ag**):**

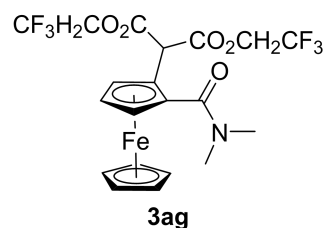

Compound **3ag** was prepared according to the general procedure. The crude product was purified by silica gel chromatography (petroleum ether:acetone = 8:1-4:1) to provide **3ag** (45.5 mg, 87%); Yellow solid; m.p.: 84-86 °C; IR:  $\nu$  2922, 1758, 1618, 1410, 1165, 1059, 840  $\text{cm}^{-1}$ ;  $^1\text{H}$  NMR (400 MHz,  $\text{CDCl}_3$ )  $\delta$  5.58 (s, 1H), 4.77-4.58 (m, 2H), 4.54 (s, 1H), 4.50-4.45 (m, 1H), 4.43 (s, 1H), 4.39-4.33 (m, 1H), 4.31 (s, 1H), 4.21 (s, 5H), 3.02 (s, 6H);  $^{13}\text{C}$  NMR (100 MHz,  $\text{CDCl}_3$ )  $\delta$  169.9, 166.1, 165.9, 80.9, 79.2, 71.0, 68.7, 67.9, 61.3 (d,  $J$  = 6.1 Hz), 61.0 (d,  $J$  = 6.3 Hz), 50.0, 29.7, 29.2;  $^{19}\text{F}$  NMR (376 MHz,  $\text{CDCl}_3$ )  $\delta$  -73.29 (t,  $J$  = 8.3 Hz), -73.89 (t,  $J$  = 8.2 Hz); HRMS (ESI):  $m/z$  calculated for  $\text{C}_{20}\text{H}_{20}\text{F}_6\text{FeNO}_5^+$   $[\text{M}+\text{H}]^+$ : 524.0590, found: 524.0597; HPLC separation (DAICEL CHIRALPAK AD, hexane:2-propanol = 95:5, flow rate: 1.0 mL/min, detection at 220nm):  $t_{\text{R}}$ (major) = 17.2 min,  $t_{\text{R}}$ (minor) = 14.1 min, 89:11 er.

mAU

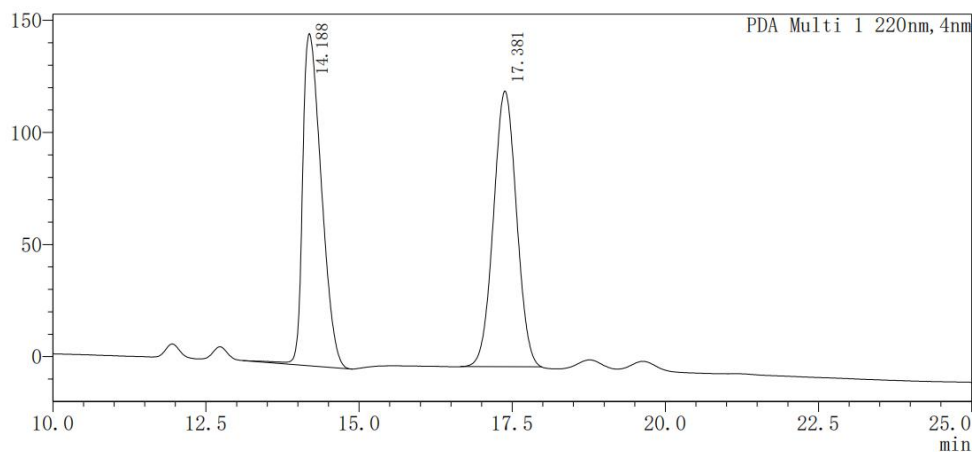

PDA Ch1 220nm

| Peak No | Ret. time | Area/% |
|---------|-----------|--------|
| 1       | 14.188    | 49.344 |
| 2       | 17.381    | 50.656 |

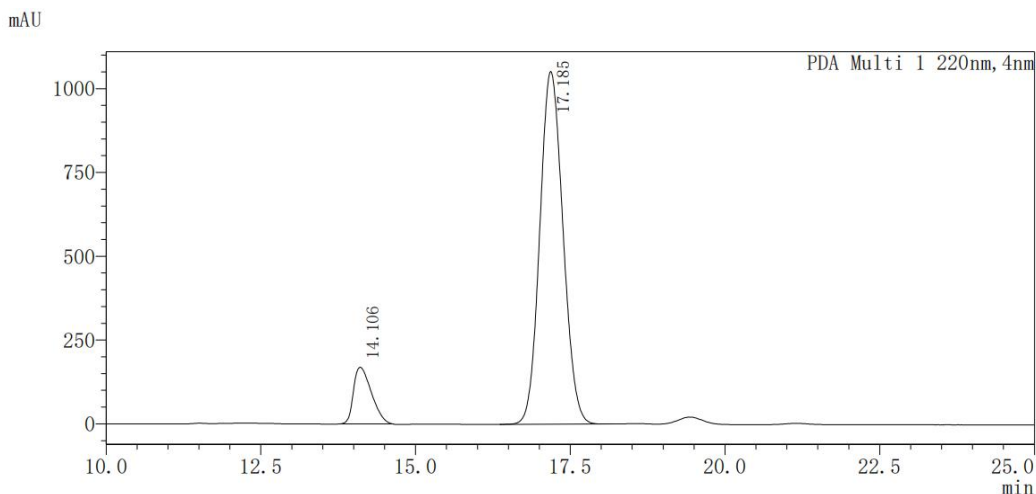

| PDA Ch1 220nm |           |        |
|---------------|-----------|--------|
| Peak No       | Ret. time | Area/% |
| 1             | 14.106    | 11.070 |
| 2             | 17.185    | 88.930 |

**(*S<sub>p</sub>*)-2-Dioctyl malonate-(dimethyl-1-carbonyl)ferrocene (**3ah**):**

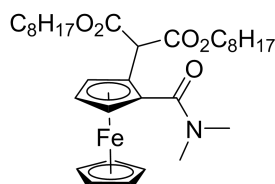

**3ah**

Compound **3ah** was prepared according to the general procedure. The crude product was purified by silica gel chromatography (petroleum ether:acetone = 8:1-4:1) to provide **3ah** (43.7 mg, 75%); Yellow solid; m.p.: 103-105 °C; IR:  $\nu$  2958, 1733, 1627, 1459, 1276, 1062, 819  $\text{cm}^{-1}$ ;  $^1\text{H}$  NMR (500 MHz,  $\text{CDCl}_3$ )  $\delta$  5.16 (s, 1H), 4.59 (s, 1H), 4.35 (s, 1H), 4.34-4.27 (m, 1H), 4.25-4.22 (m, 2H), 4.21 (s, 5H), 4.06-3.96 (m, 2H), 2.99 (s, 6H), 1.78-1.72 (m, 2H), 1.58-1.49 (m, 2H), 1.48-1.40 (m, 2H), 1.37-1.28 (m, 16H), 0.94-0.78 (m, 8H);  $^{13}\text{C}$  NMR (125 MHz,  $\text{CDCl}_3$ )  $\delta$  170.0, 168.4, 168.3, 82.5, 80.8, 70.8, 68.8, 68.0, 67.3, 65.6, 65.5, 50.6, 31.8, 31.8, 29.2, 29.2, 29.2, 29.2, 28.6, 28.5, 26.0, 25.7, 22.6, 14.1; HRMS (ESI):  $m/z$  calculated for  $\text{C}_{32}\text{H}_{50}\text{FeNO}_5^+$   $[\text{M}+\text{H}]^+$ : 584.3033, found: 584.3043; HPLC separation (DAICEL CHIRALPAK OD, hexane:2-propanol = 95:5, flow rate: 1.0 mL/min, detection at 220nm):  $t_R$ (major) = 7.6 min,  $t_R$ (minor) = 28.5 min, 85:15 er.

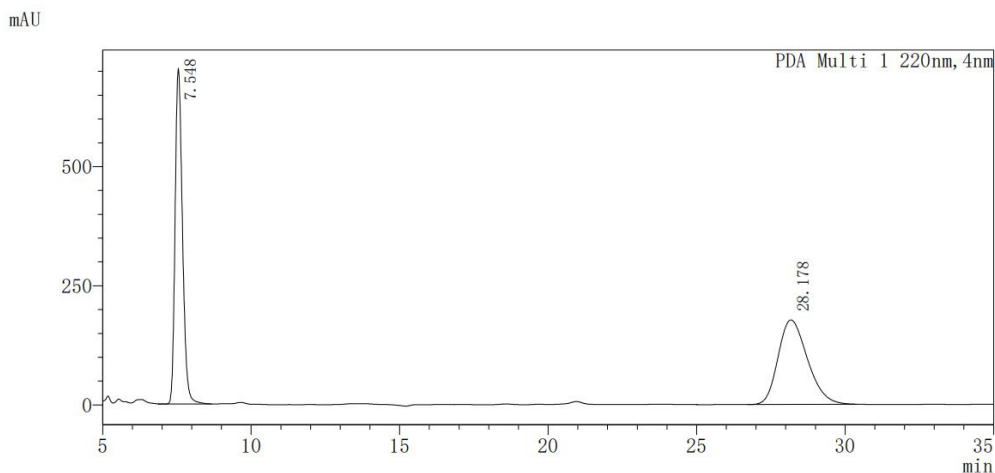

| PDA Ch1 220nm |           |        |
|---------------|-----------|--------|
| Peak No       | Ret. time | Area/% |
| 1             | 7.548     | 49.883 |
| 2             | 28.178    | 50.117 |

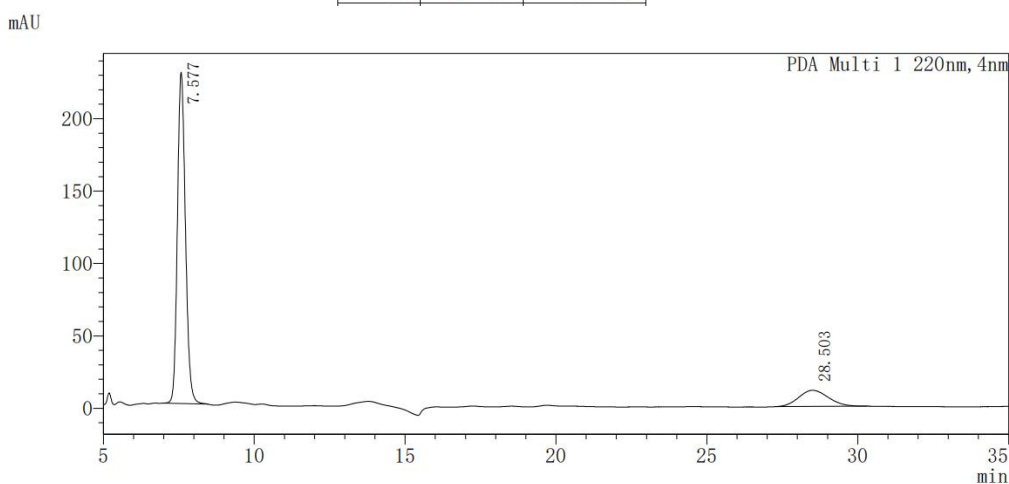

| PDA Ch1 220nm |           |        |
|---------------|-----------|--------|
| Peak No       | Ret. time | Area/% |
| 1             | 7.577     | 84.717 |
| 2             | 28.503    | 15.283 |

**(*S<sub>p</sub>*)-2-Dibenzyl malonate-(dimethyl-1-carbonyl)ferrocene (**3ai**):**

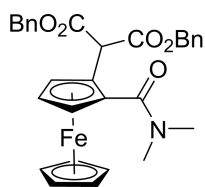

**3ai**

Compound **3ai** was prepared according to the general procedure. The crude product was purified by silica gel chromatography (petroleum ether:acetone = 8:1-4:1) to provide **3ai** (39.9 mg, 74%); Yellow solid; m.p.: 102-104 °C; IR:  $\nu$  2921, 1731, 1617, 1455, 1274, 1001, 819  $\text{cm}^{-1}$ ;  $^1\text{H}$  NMR (500 MHz,  $\text{CDCl}_3$ )  $\delta$  7.47-7.40 (m, 2H), 7.39-7.24 (m, 6H), 7.22-7.15 (m, 2H), 5.35-5.24 (m, 3H), 5.13-5.05 (m, 1H), 5.04-4.97 (m, 1H), 4.57 (s, 1H), 4.31 (s, 1H), 4.23-4.19 (m, 1H), 4.11 (s, 5H), 2.84 (s, 6H);  $^{13}\text{C}$  NMR (125 MHz,  $\text{CDCl}_3$ )  $\delta$  169.8, 168.0, 167.8, 135.4, 135.3, 128.7, 128.6, 128.5, 128.5, 128.1, 128.0, 82.2, 80.6, 70.8, 68.7, 68.0, 67.3, 67.1, 50.6, 39.0, 35.6;



HRMS (ESI):  $m/z$  calculated for  $C_{30}H_{30}FeNO_5^+$   $[M+H]^+$ : 540.1468, found: 540.1466;  
HPLC separation (DAICEL CHIRALPAK IA, hexane:2-propanol = 95:5, flow rate: 1.0 mL/min, detection at 254nm):  $t_R$ (major) = 43.1 min,  $t_R$ (minor) = 50.2 min, 88:12  
er.

mAU

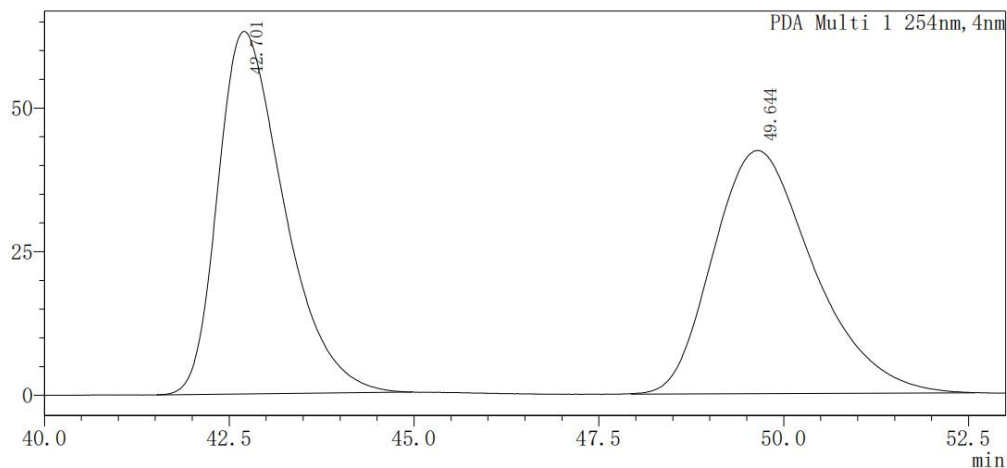

PDA Ch1 254nm

| Peak No | Ret. time | Area/% |
|---------|-----------|--------|
| 1       | 42.701    | 49.623 |
| 2       | 49.644    | 50.377 |

mAU

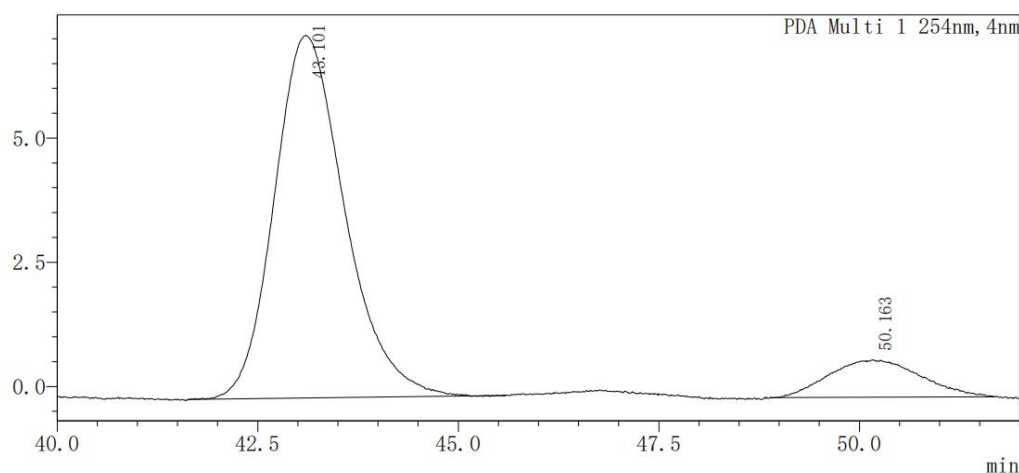

PDA Ch1 254nm

| Peak No | Ret. time | Area/% |
|---------|-----------|--------|
| 1       | 43.101    | 88.182 |
| 2       | 50.163    | 11.818 |

## 2.5 H/D Exchange Experiments

(a) Reaction without **2a**

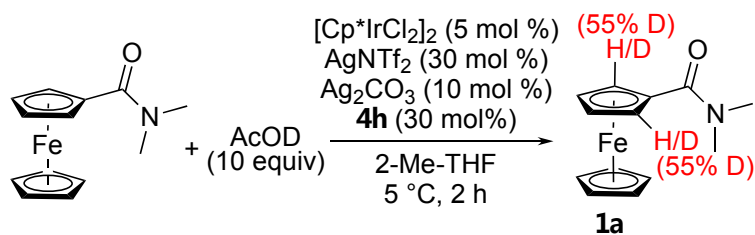

To a dried screw-capped vial were added ferrocene carboxamide **1** (0.10 mmol),

AcOD (57.2  $\mu$ L, 10 equiv), [Cp\*IrCl<sub>2</sub>]<sub>2</sub> (4.0 mg, 0.005 mmol), AgNTf<sub>2</sub> (11.7 mg, 0.03 mmol), Ag<sub>2</sub>CO<sub>3</sub> (2.8 mg, 0.01 mmol), **4h** (13.1 mg, 0.03 mmol) and 2-Me-THF (0.5 mL) under nitrogen atmosphere. The vial was capped, and the mixture was cooled at 5 °C for 2 h with stirring. The resulting mixture was directly purified by silica gel column chromatography (petroleum ether:acetone = 4:1) to give **1a**.

[<sup>1</sup>H NMR chart of recovered **1a**]:

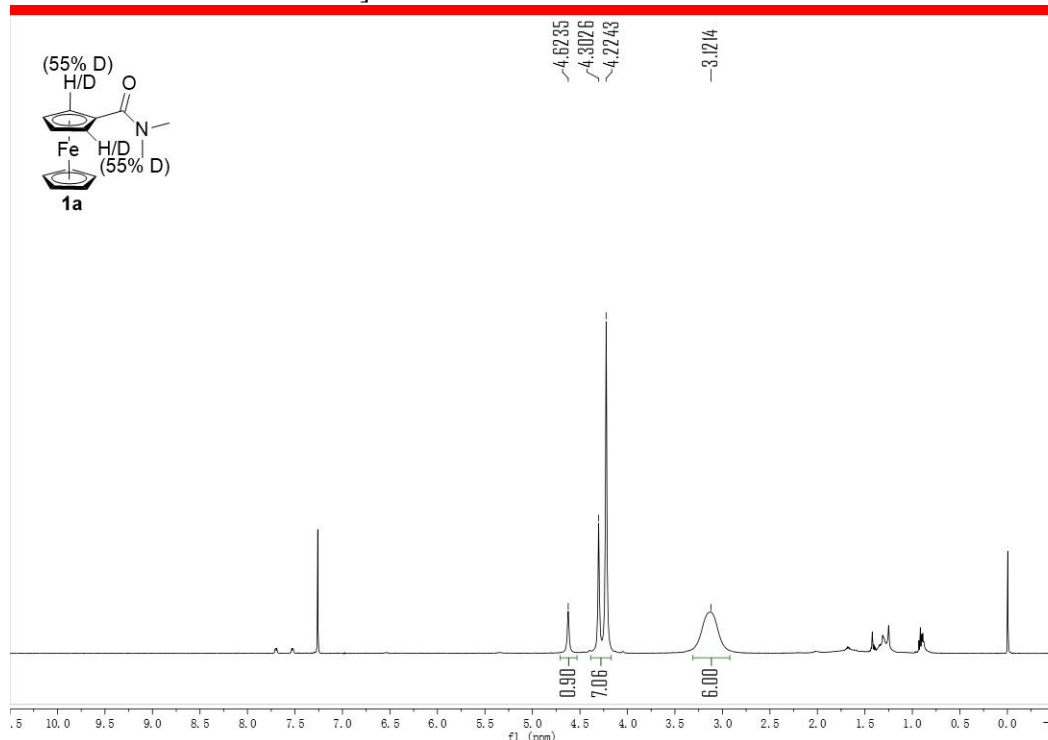

(b) Reaction with **2a**

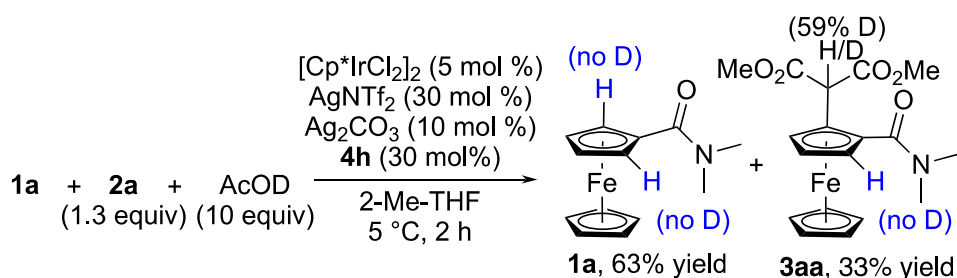

To a dried screw-capped vial were added ferrocene carboxamide **1a** (0.10 mmol), **2** (0.13 mmol, 1.3 equiv), AcOD (57.2  $\mu$ L, 10 equiv), [Cp\*IrCl<sub>2</sub>]<sub>2</sub> (4.0 mg, 0.005 mmol), AgNTf<sub>2</sub> (11.7 mg, 0.03 mmol), Ag<sub>2</sub>CO<sub>3</sub> (2.8 mg, 0.01 mmol), **4h** (13.1 mg, 0.03 mmol) and 2-Me-THF (0.5 mL) under nitrogen atmosphere. The vial was capped, and the mixture was cooled at 5 °C for 2 h with stirring. The resulting mixture was directly purified by silica gel column chromatography (petroleum ether:acetone = 4:1) to give **1a** (63% yield) and **3aa** (33% yield).

[<sup>1</sup>H NMR chart of recovered **1a**]

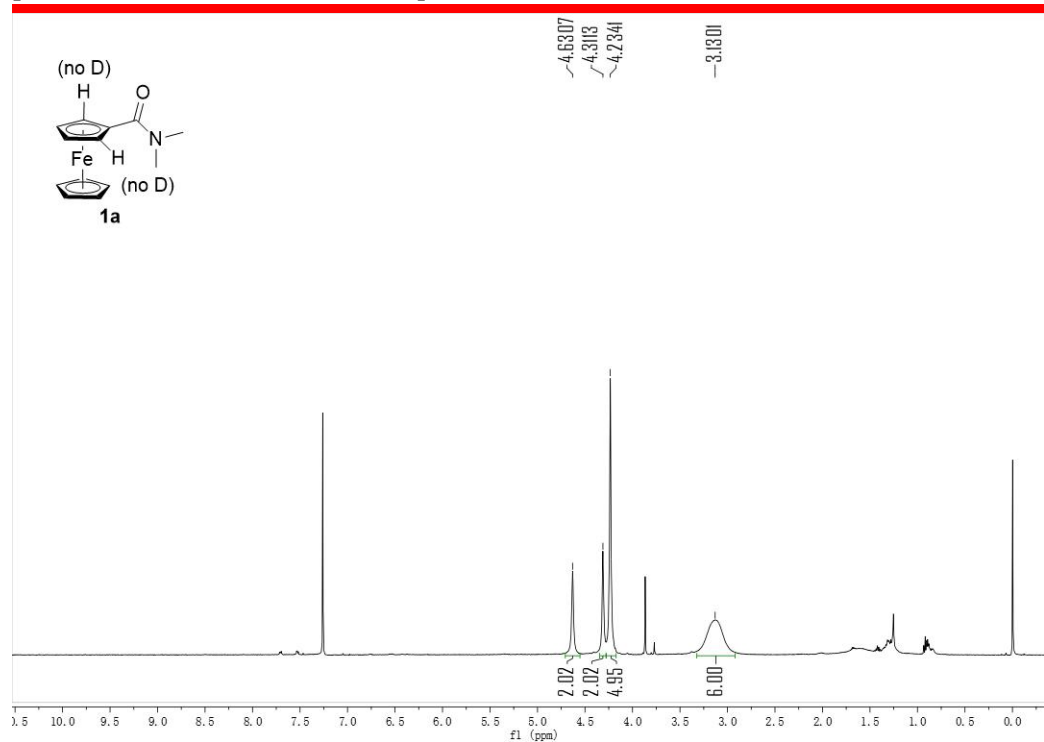

[<sup>1</sup>H NMR chart of **3aa**]

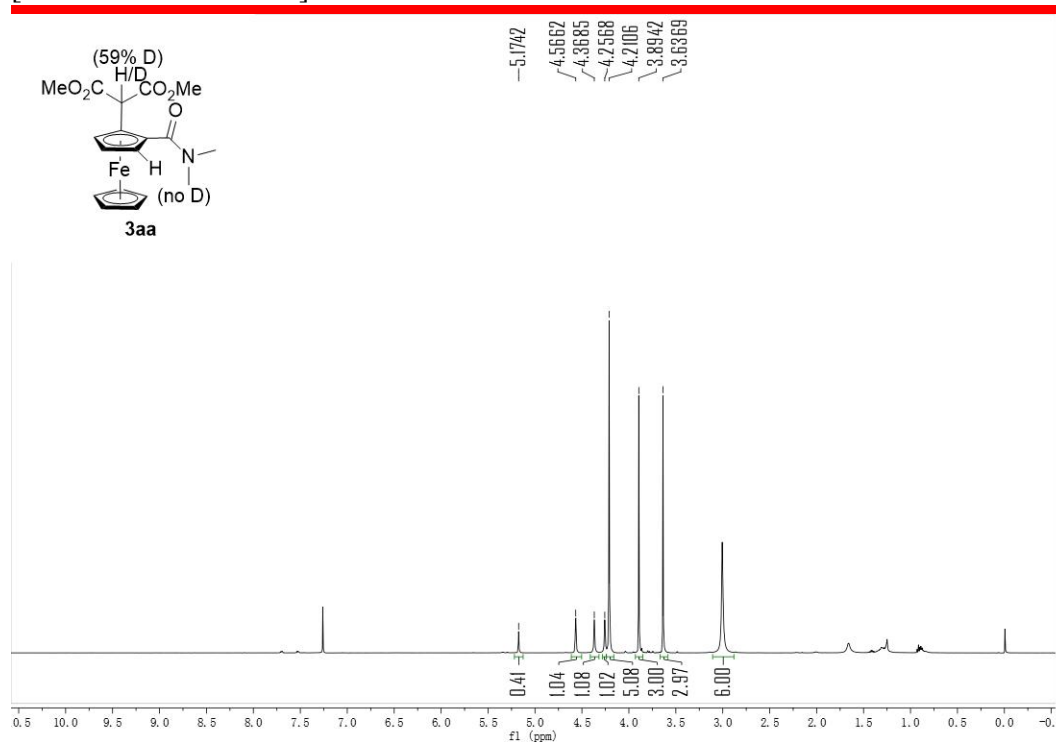

## 2.6 Preparative Scale Reaction

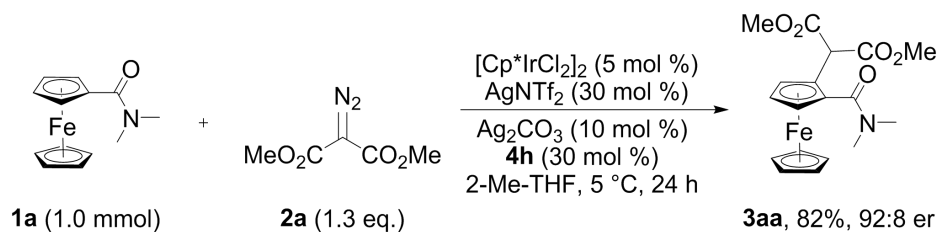

To a 50 mL Schlenk tube was added **1a** (257.1 mg, 1.0 mmol), **2a** (205.4 mg, 1.3 mmol),  $[\text{Cp}^*\text{IrCl}_2]_2$  (40.1 mg, 0.05 mmol),  $\text{AgNTf}_2$  (116.4 mg, 0.3 mmol),  $\text{Ag}_2\text{CO}_3$  (27.6 mg, 0.1 mmol), **4h** (130.3 mg, 0.3 mmol), 2-Me-THF (5.0 mL). The mixture was evacuated and refilled with  $\text{N}_2$  for three times. Then the reaction was kept stirring at 5 °C for 24 h. After the solvent was removed under reduced pressure, the residue was purified by silica gel column chromatography (petroleum ether:acetone = 8:1-4:1) to afford amide **3aa** (317.4 mg, 82% yield, 92:8 er).

## 2.7 Derivations of 3aa

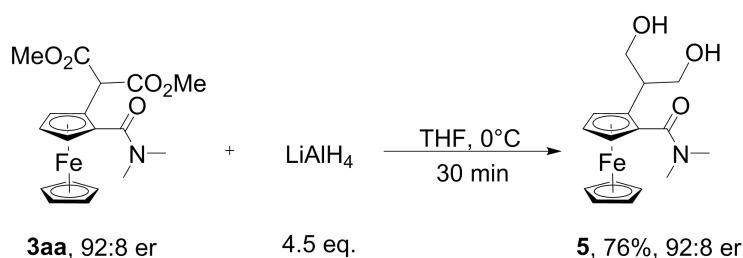

**3aa** (193.5 mg, 0.5 mmol) in THF (2 mL),  $\text{LiAlH}_4$  (85.4 mg, 2.25 mmol) was added in several times at 0 °C. Then the reaction was kept stirring at room temperature for 30 min. The mixture was quenched with water, extracted with ethyl acetate. The combined organic layers were washed with brine, dried over anhydrous  $\text{Na}_2\text{SO}_4$  and filtrated. After the solvent was removed under reduced pressure, the residue was purified by silica gel column chromatography (dichloromethane:methanol = 30:1) to give **5** as a red solid (125.8 mg, 76%); m.p.: 137-139 °C; IR:  $\nu$  3385, 2926, 1608, 1456, 1036, 820  $\text{cm}^{-1}$ ;  $^1\text{H}$  NMR (400 MHz,  $\text{CDCl}_3$ )  $\delta$  4.31-4.27 (m, 1H), 4.26 (s, 5H), 4.24-4.21 (m, 1H), 4.21-4.15 (m, 2H), 4.02-3.82 (m, 1H), 3.80-3.68 (m, 3H), 3.68-3.57 (m, 1H), 3.25-3.14 (m, 1H), 3.01 (s, 6H);  $^{13}\text{C}$  NMR (100 MHz,  $\text{CDCl}_3$ )  $\delta$  171.1, 90.7, 80.1, 70.6, 67.7, 67.4, 66.9, 66.7, 65.8, 41.3; HRMS (ESI):  $m/z$  calculated for  $\text{C}_{16}\text{H}_{22}\text{FeNO}_3^+$   $[\text{M}+\text{H}]^+$ : 332.0944, found: 332.0941; HPLC separation (DAICEL CHIRALPAK OD, hexane:2-propanol = 90:10, flow rate: 1.0 mL/min, detection at 254nm):  $t_{\text{R}}$ (major) = 9.8 min,  $t_{\text{R}}$ (minor) = 11.8 min, 92:8 er.

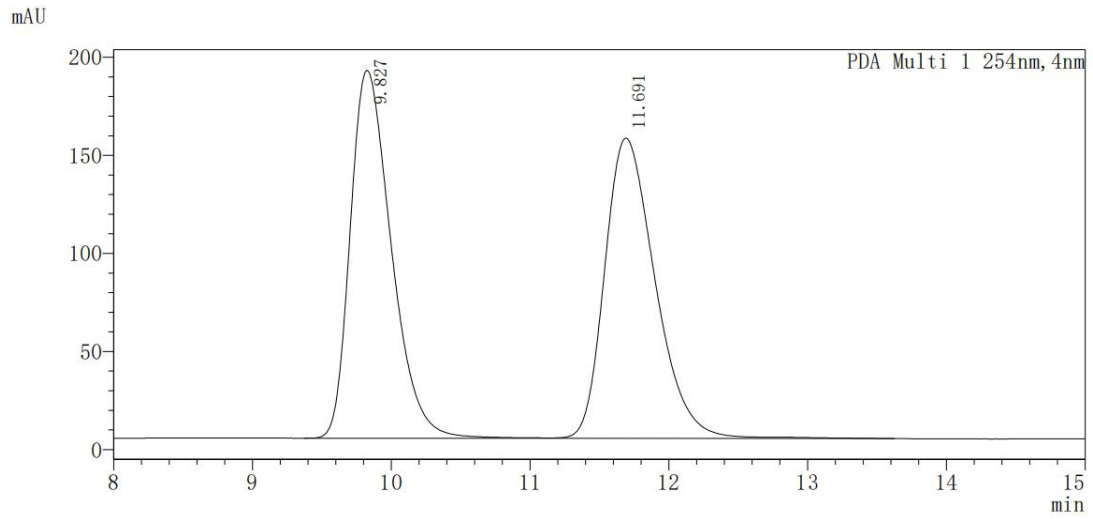

PDA Ch1 254nm

| Peak No | Ret. time | Area/% |
|---------|-----------|--------|
| 1       | 9.827     | 49.876 |
| 2       | 11.691    | 50.124 |

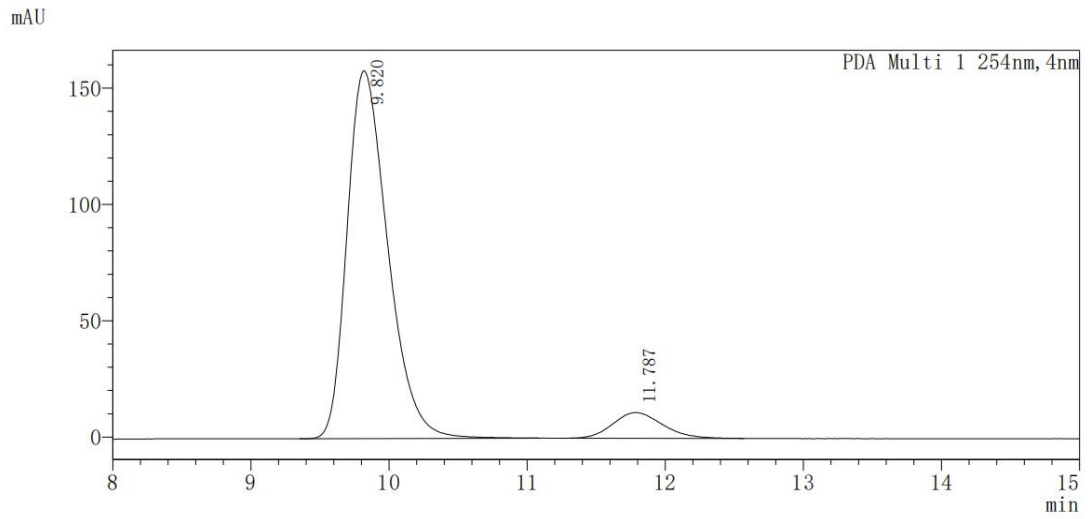

PDA Ch1 254nm

| Peak No | Ret. time | Area/% |
|---------|-----------|--------|
| 1       | 9.820     | 92.136 |
| 2       | 11.787    | 7.864  |

### 3. X-ray Crystallographic Analysis of 3aa

Crystallographic data has been deposited with the Cambridge Crystallographic Data Centre as supplementary publication CCDC Number: 2094161. Copies of the data can be obtained, free of charge from <https://www.ccdc.cam.ac.uk>.

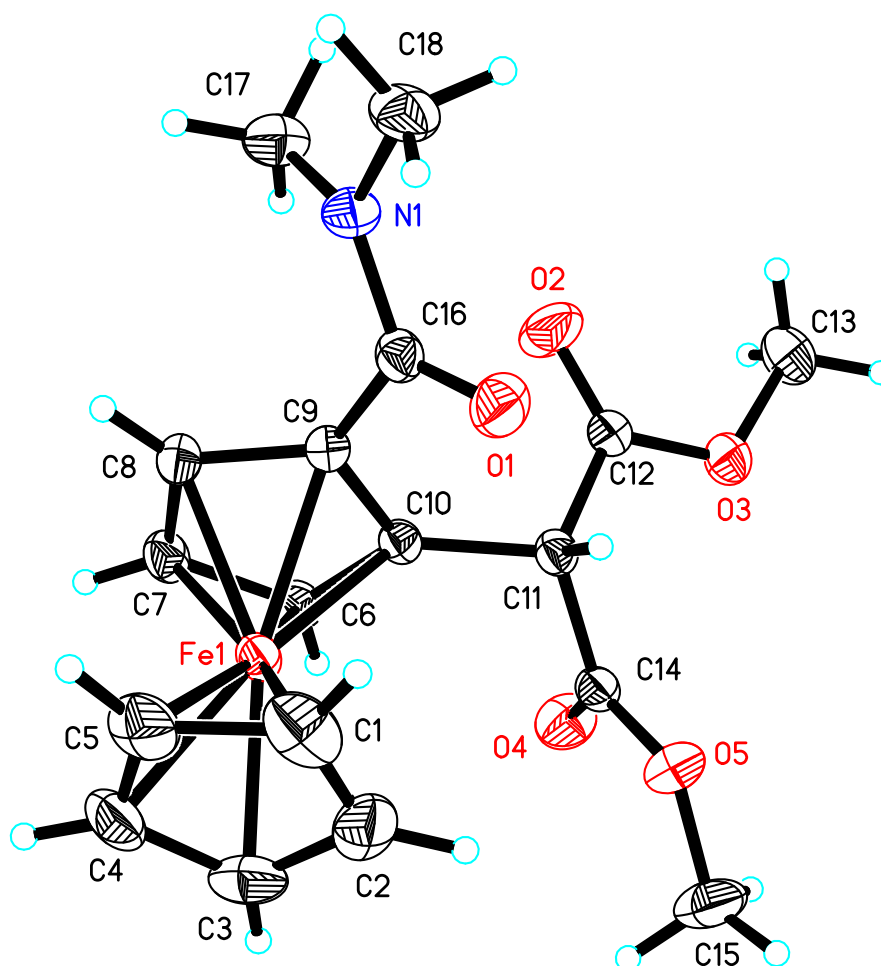

Bond precision: C-C = 0.0043 Å Wavelength=0.71073

Cell: a=7.4884(2) b=14.7146(4) c=8.3630(2)

alpha=90 beta=108.511(1) gamma=90

Temperature: 293 K

|                | Calculated      | Reported        |
|----------------|-----------------|-----------------|
| Volume         | 873.83(4)       | 873.83(4)       |
| Space group    | P 21            | P 21            |
| Hall group     | P 2yb           | P 2yb           |
| Moiety formula | C18 H21 Fe N O5 | C18 H21 Fe N O5 |
| Sum formula    | C18 H21 Fe N O5 | C18 H21 Fe N O5 |
| Mr             | 387.21          | 387.21          |
| Dx,g cm-3      | 1.472           | 1.472           |
| Z              | 2               | 2               |
| Mu (mm-1)      | 0.891           | 0.891           |
| F000           | 404.0           | 404.0           |
| F000'          | 404.87          |                 |
| h,k,lmax       | 9,18,10         | 9,18,10         |
| Nref           | 3431[ 1787]     | 3382            |
| Tmin,Tmax      | 0.852,0.899     | 0.628,0.746     |
| Tmin'          | 0.837           |                 |

Correction method= # Reported T Limits: Tmin=0.628 Tmax=0.746

AbsCorr = MULTI-SCAN

Data completeness= 1.89/0.99 Theta(max)= 25.992

R(reflections)= 0.0211( 3305) wR2(reflections)= 0.0556( 3382)

S = 1.055

Npar= 231

#### 4. References

- [S1] M. Tazi, W. Erb, Y. S. Halauko, O. A. Ivashkevich, V. E. Matulis, T. Roisnel, V. Dorcet, F. Mongin, *Organometallics*, 2017, **36**, 4770.
- [S2] L. Liu, H. Song, Y.-H. Liu, L.-S. Wu, B.-F. Shi, *ACS Catal.*, 2020, **10**, 7117.
- [S3] Y. Wu, P. Sun, K. Zhang, T. Yang, H. Yao, A. Lin, *J. Org. Chem.*, 2016, 81, 2166.
- [S4] Hoshino, Y. Yamamoto, H. *J. Am. Chem. Soc.*, 2000, **122**, 10452.
- [S5] S. Fukagawa, M. Kojima, T. Yoshino, S. Matsunaga, *Angew. Chem., Int. Ed.*, 2019, **58**, 18154.
- [S6] X. Ma, Z. Gu, *RSC Adv.*, 2014, **4**, 36241.



## 5. NMR Spectra

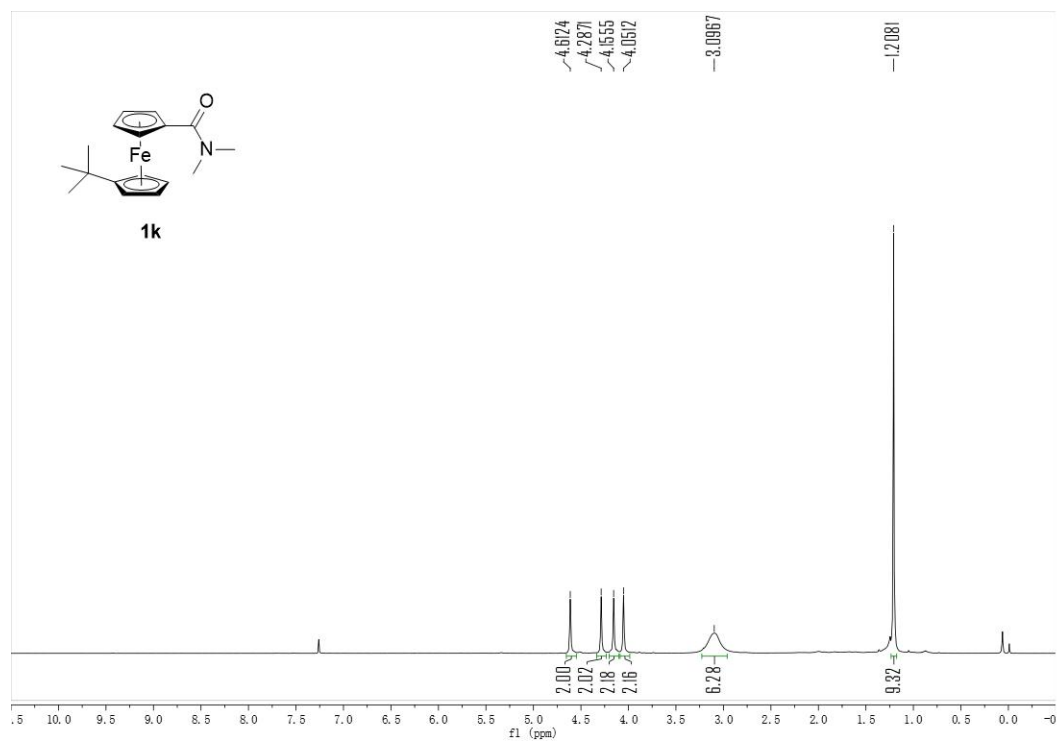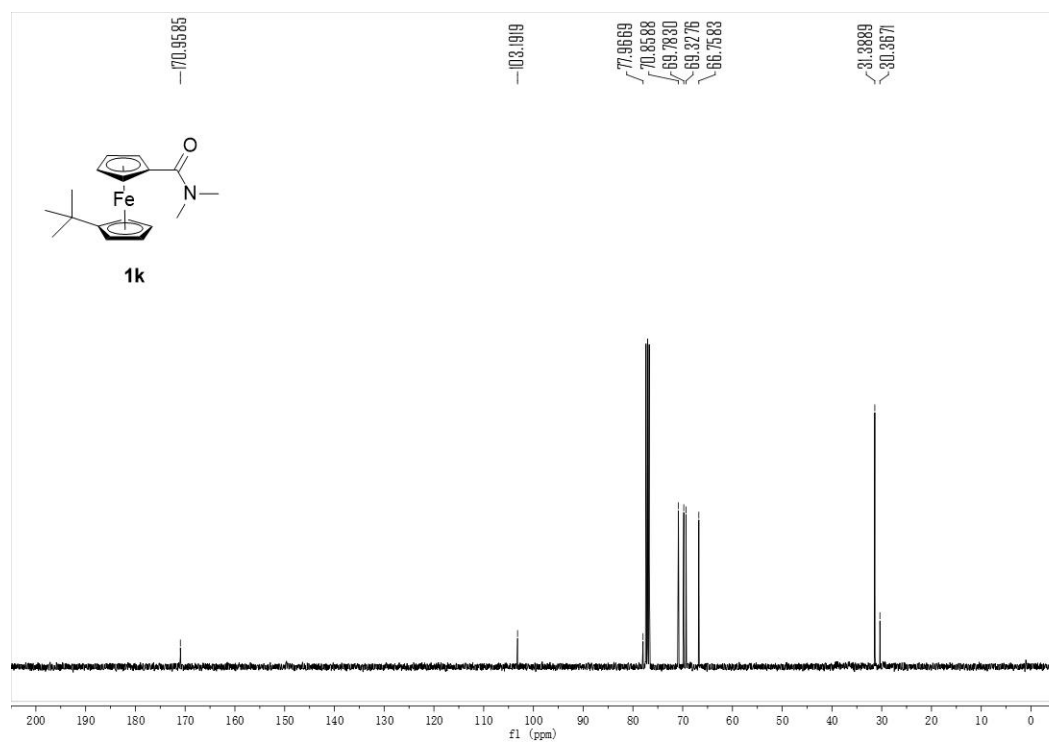

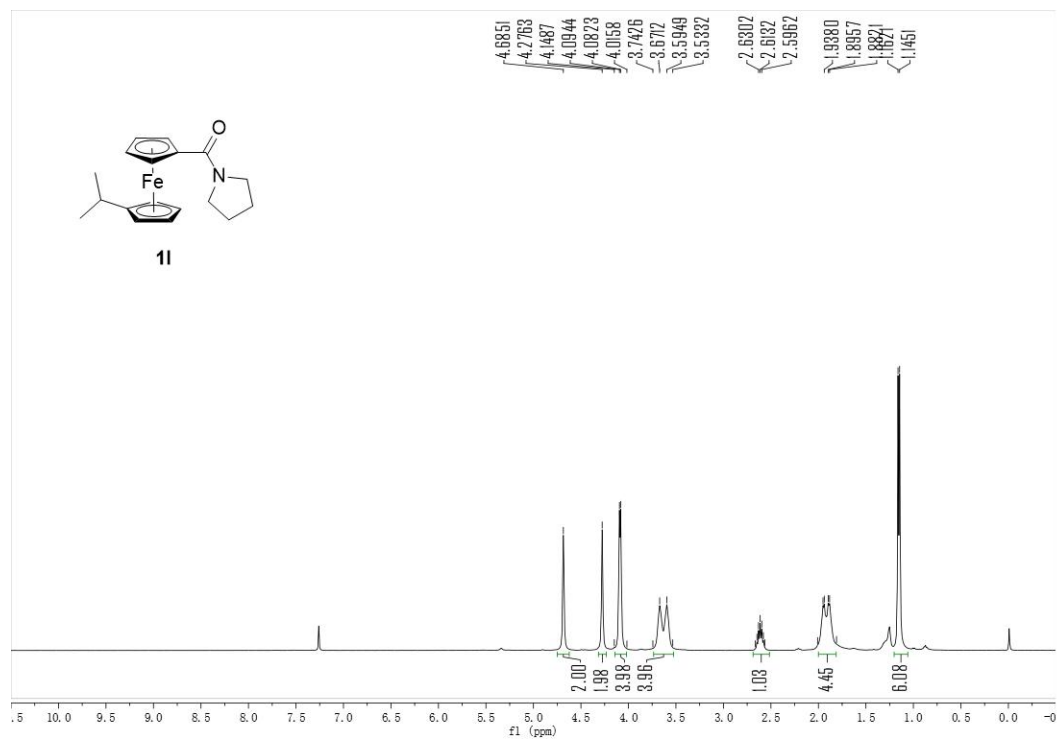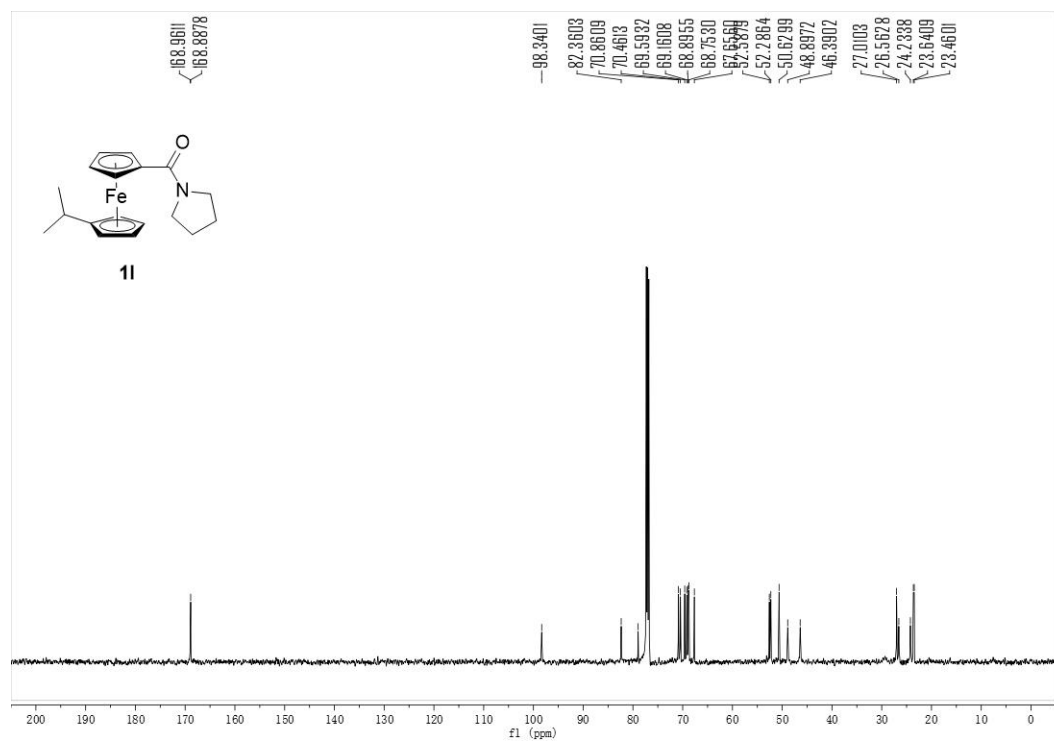

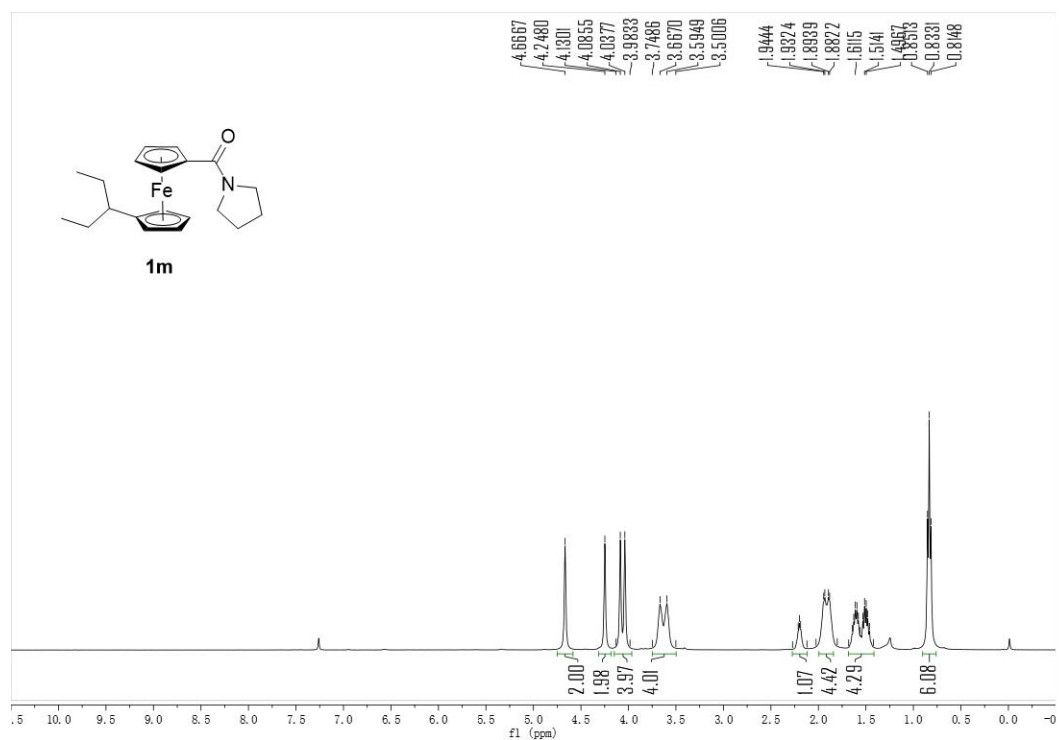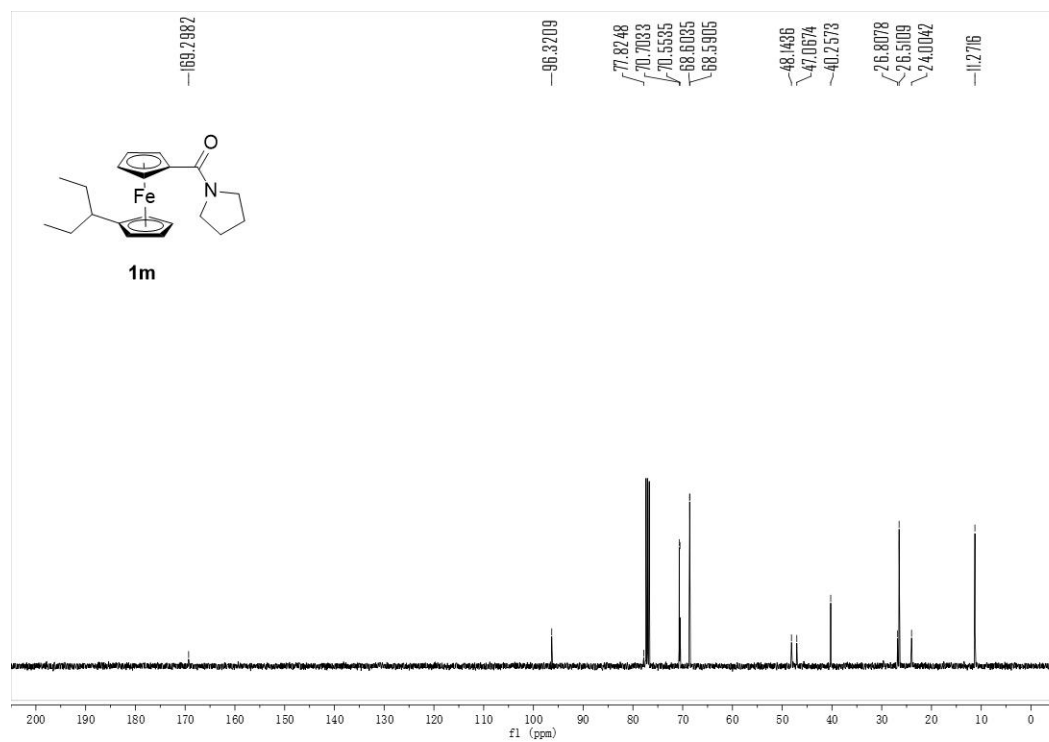

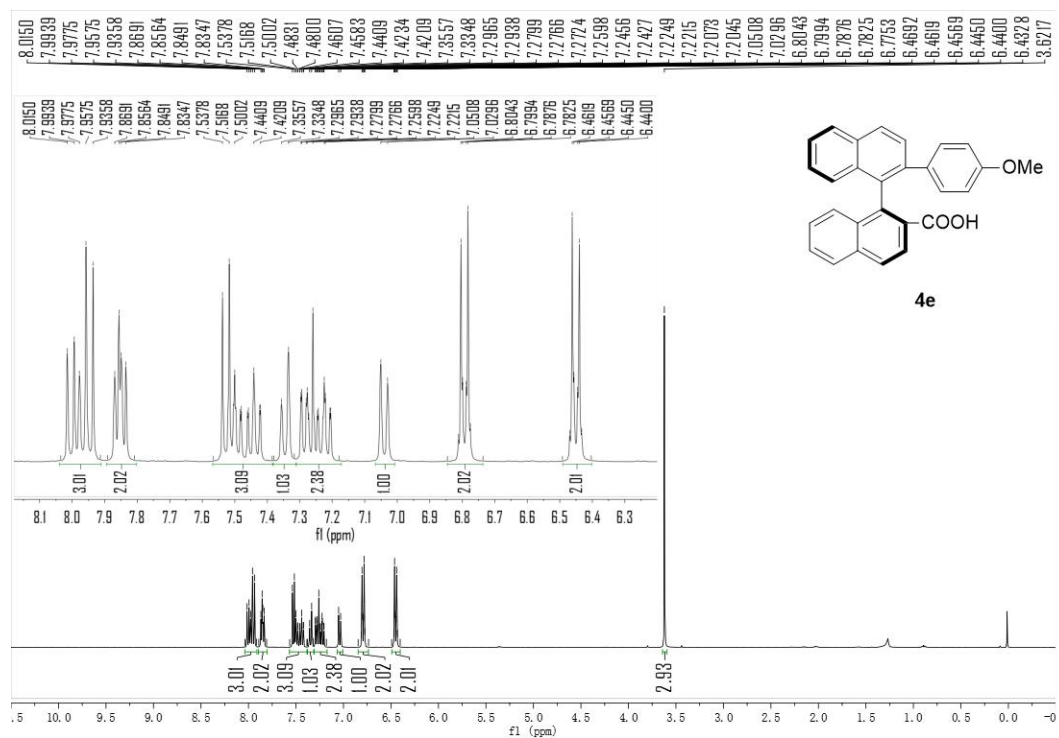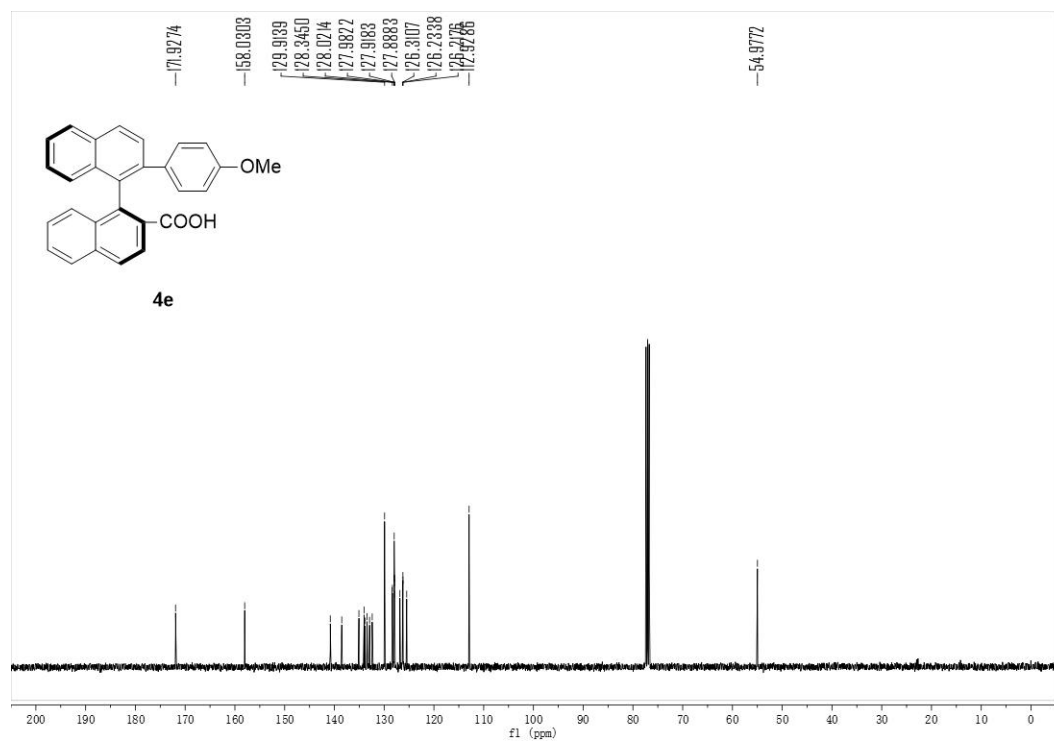

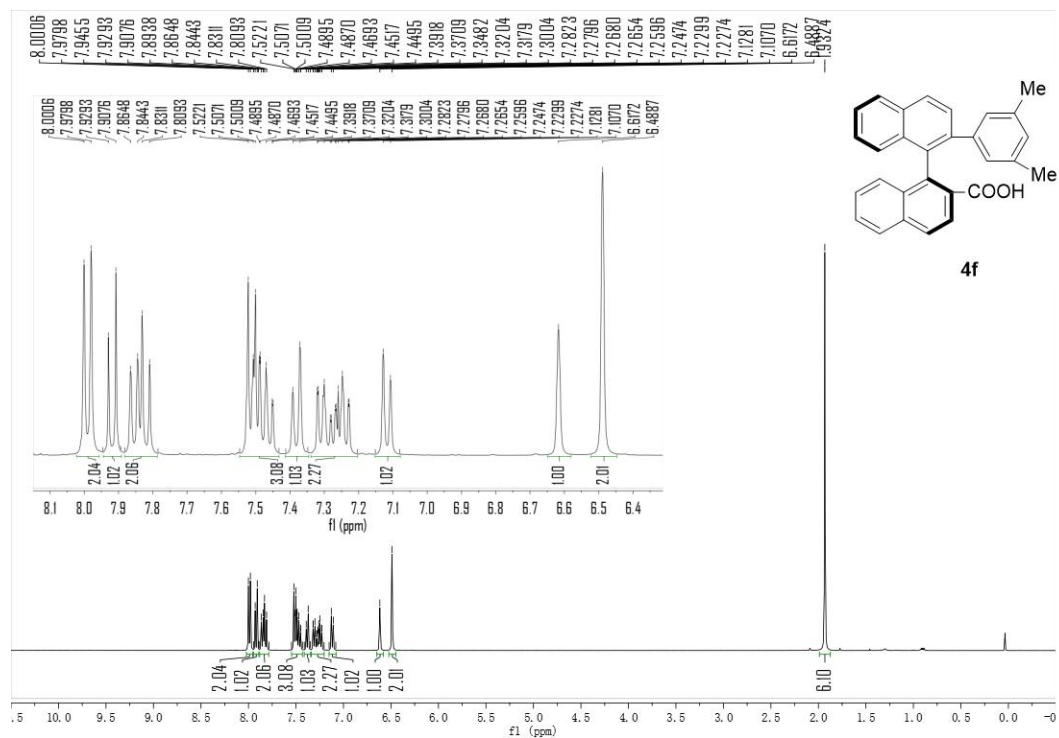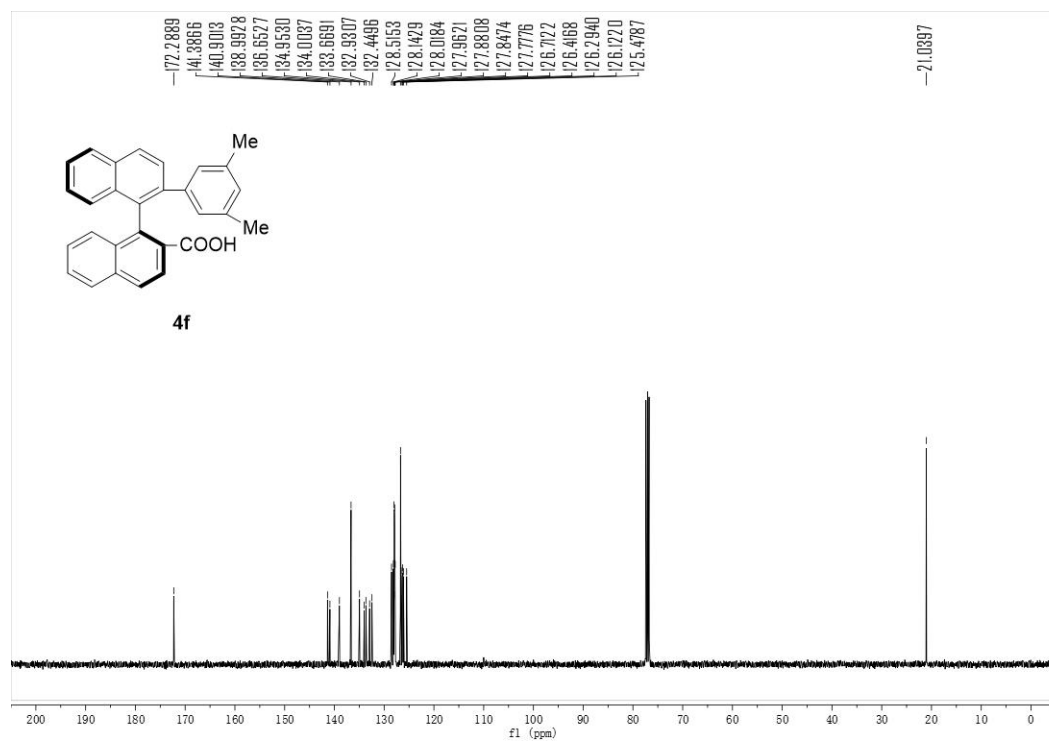

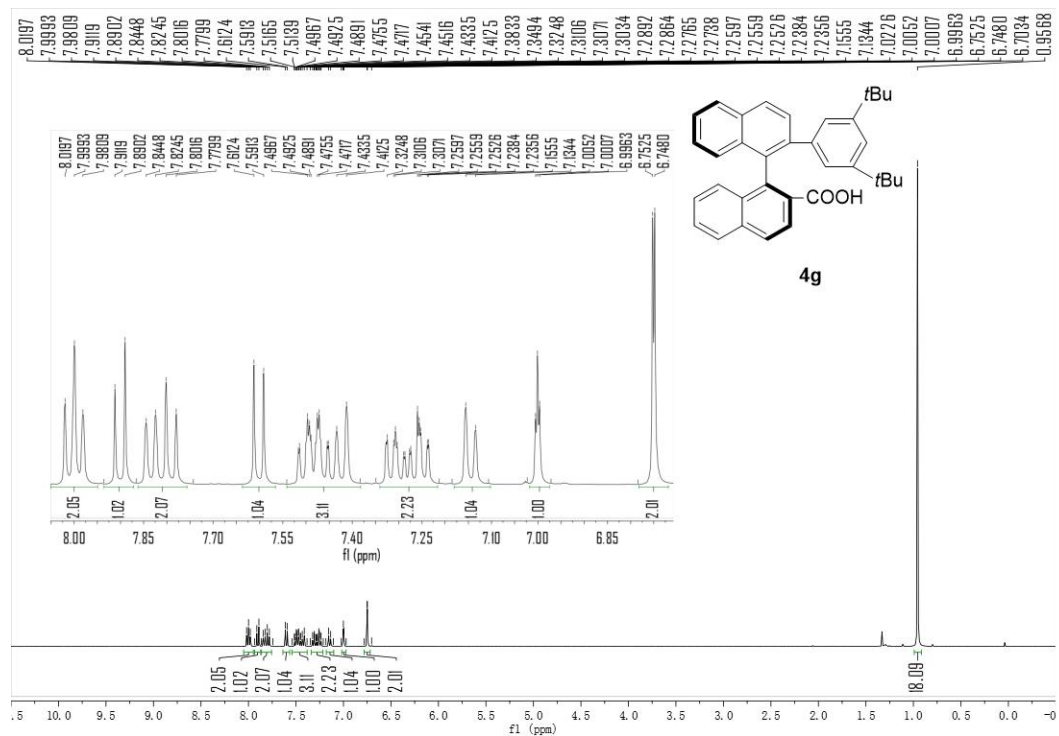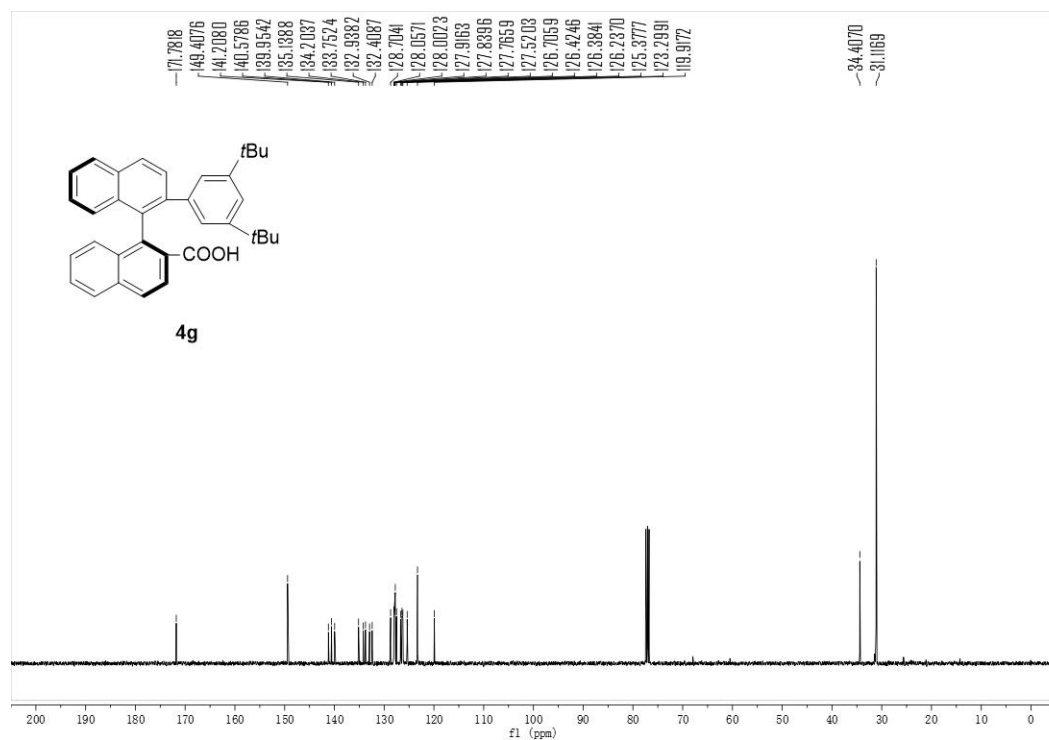

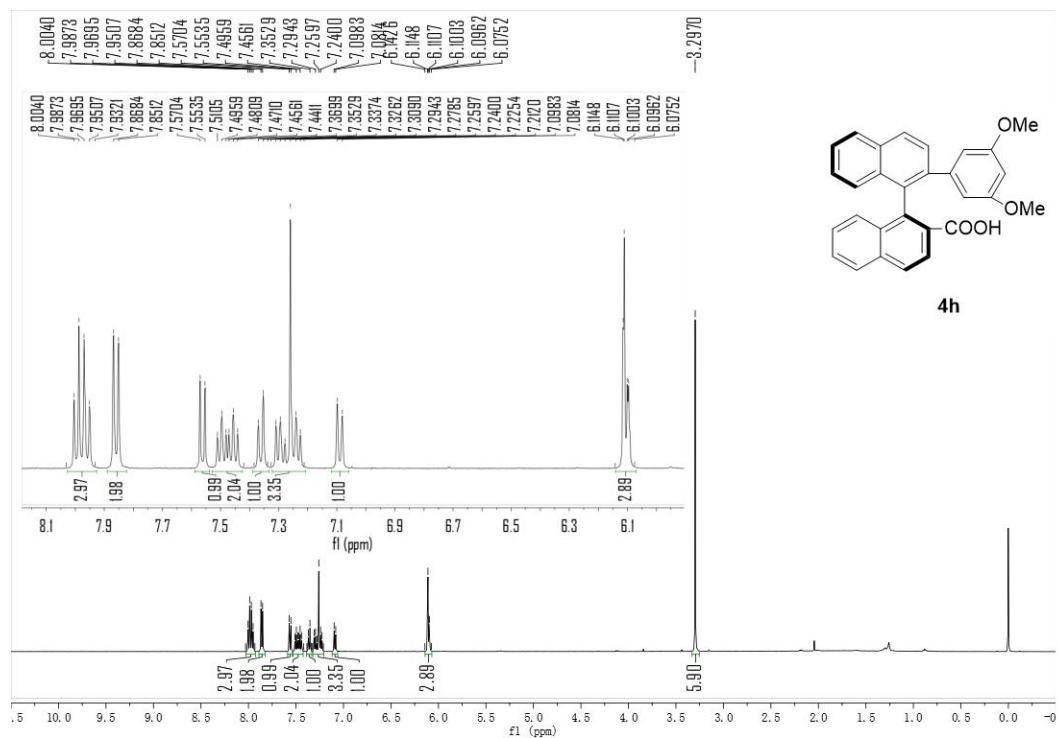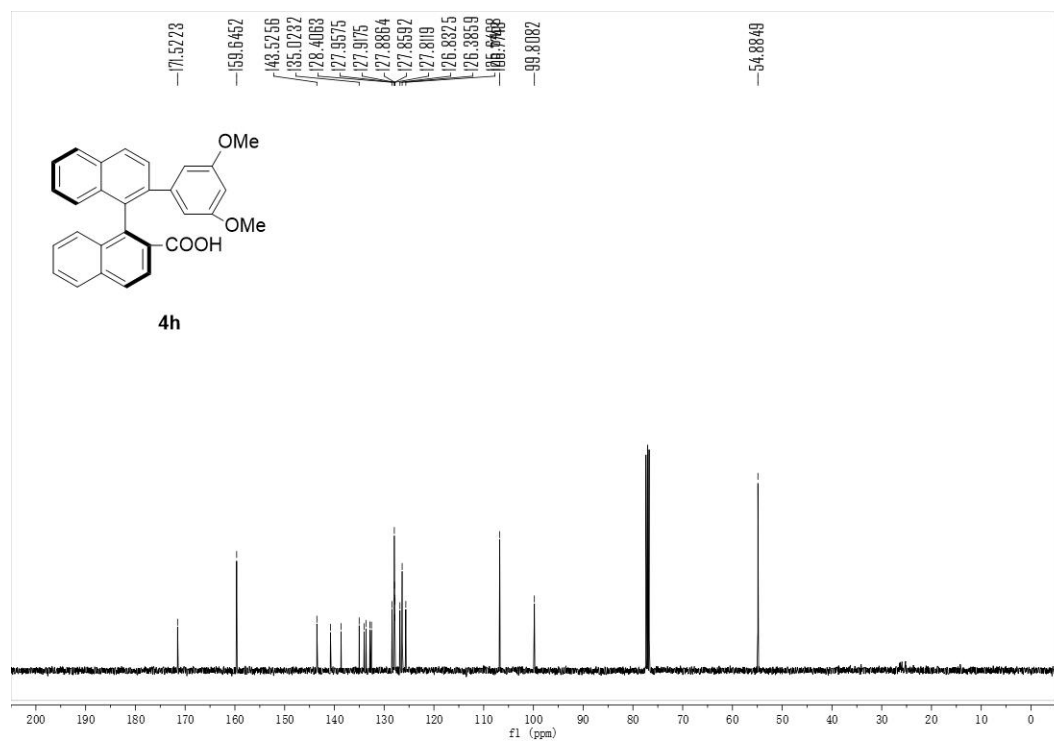

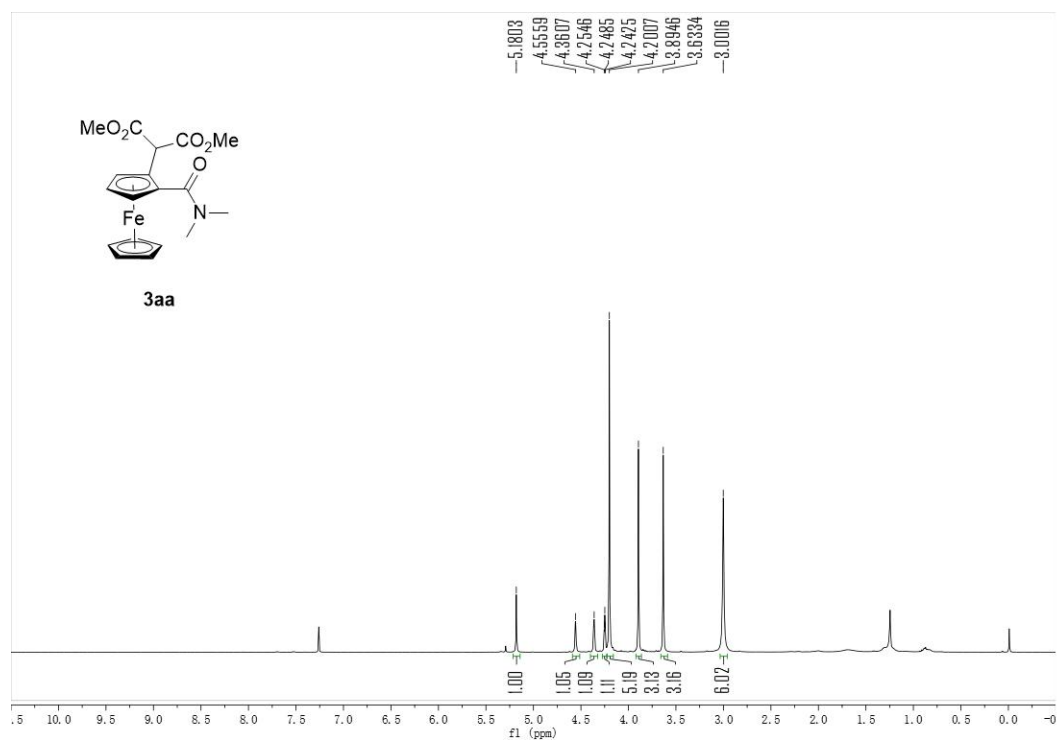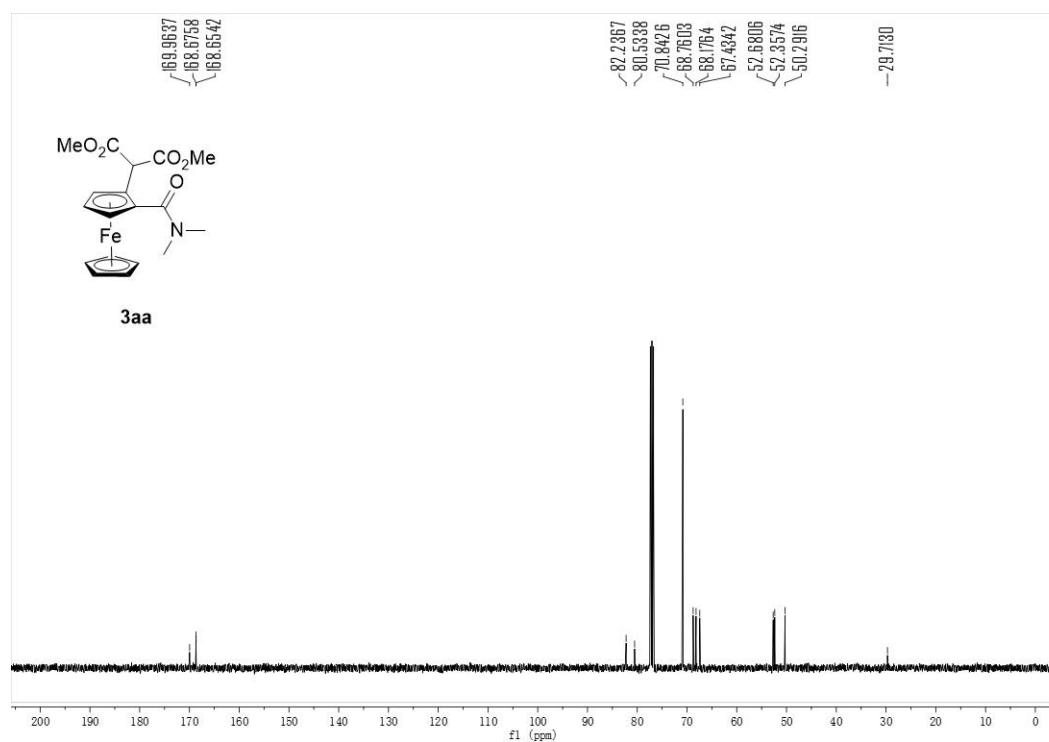



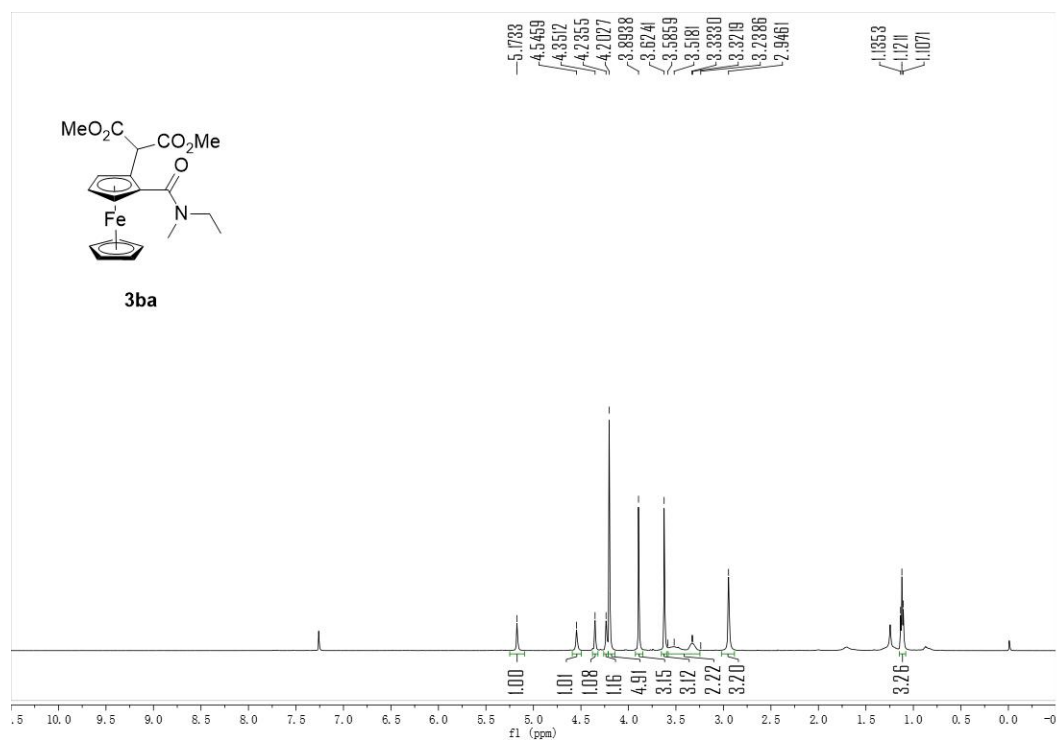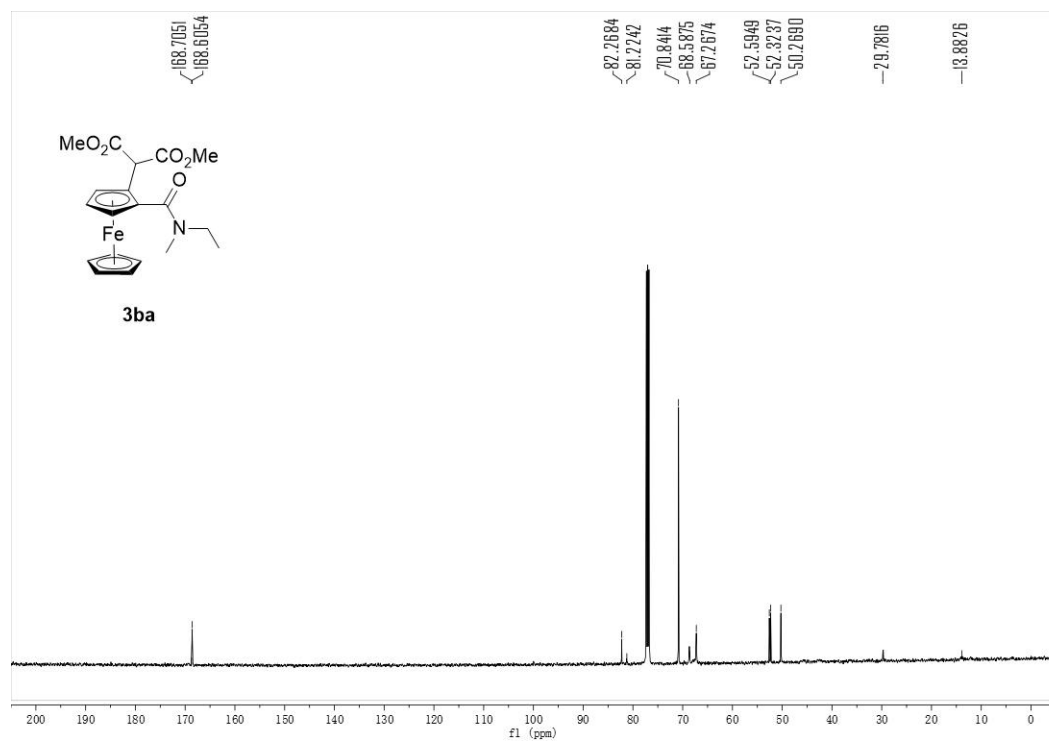

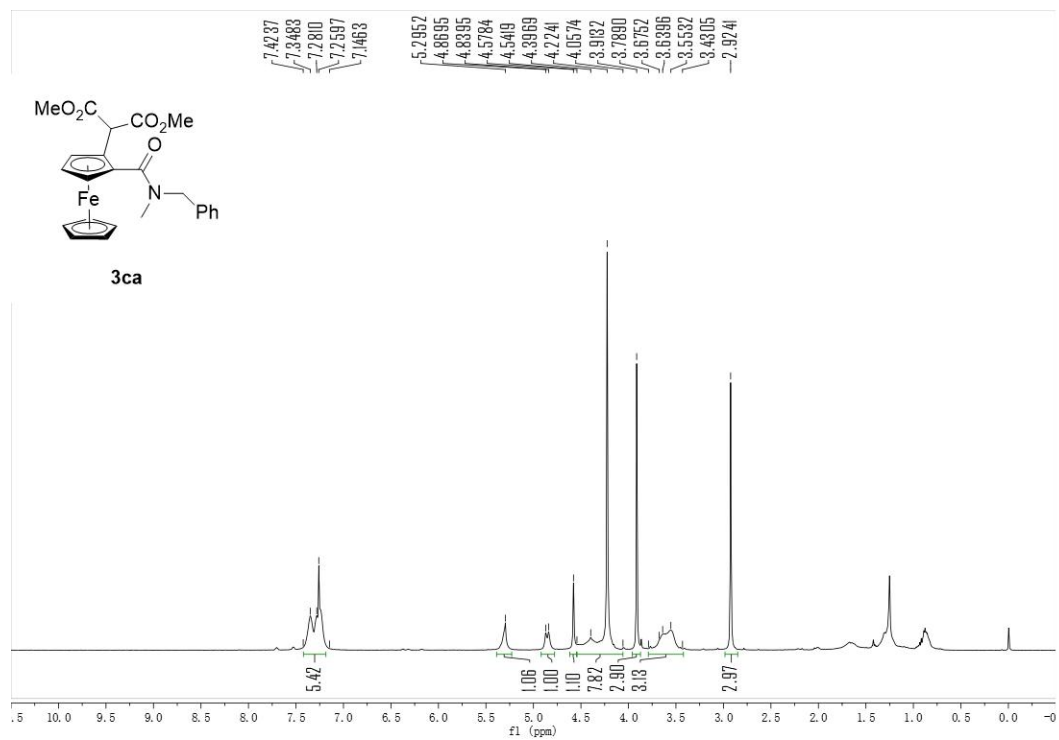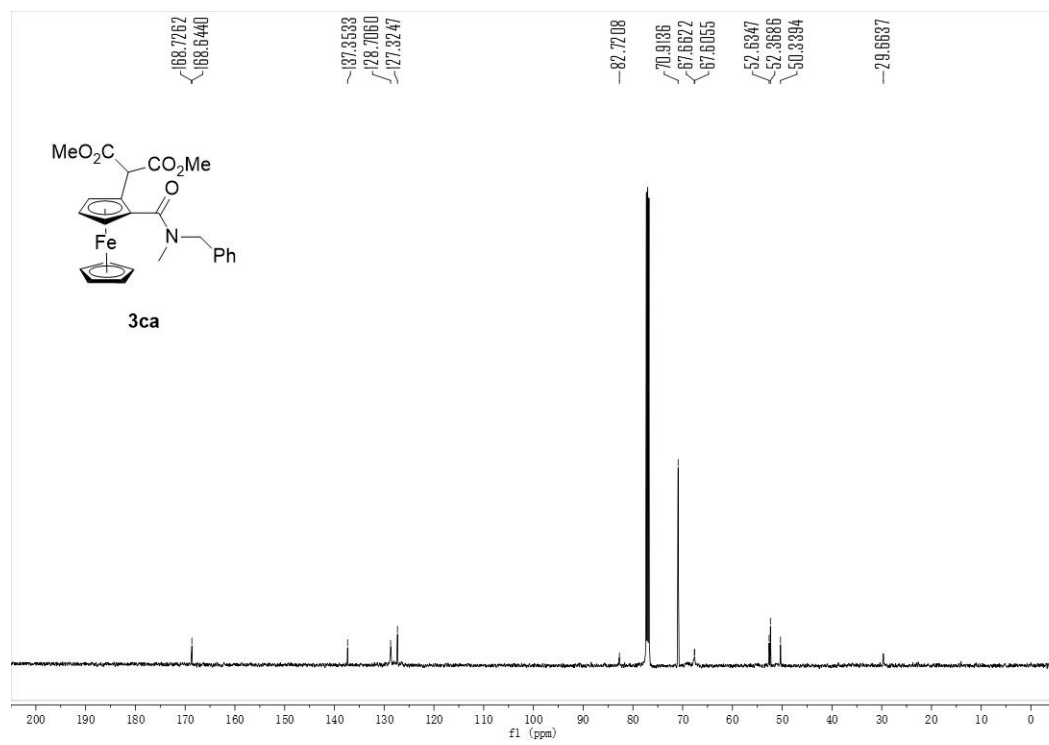

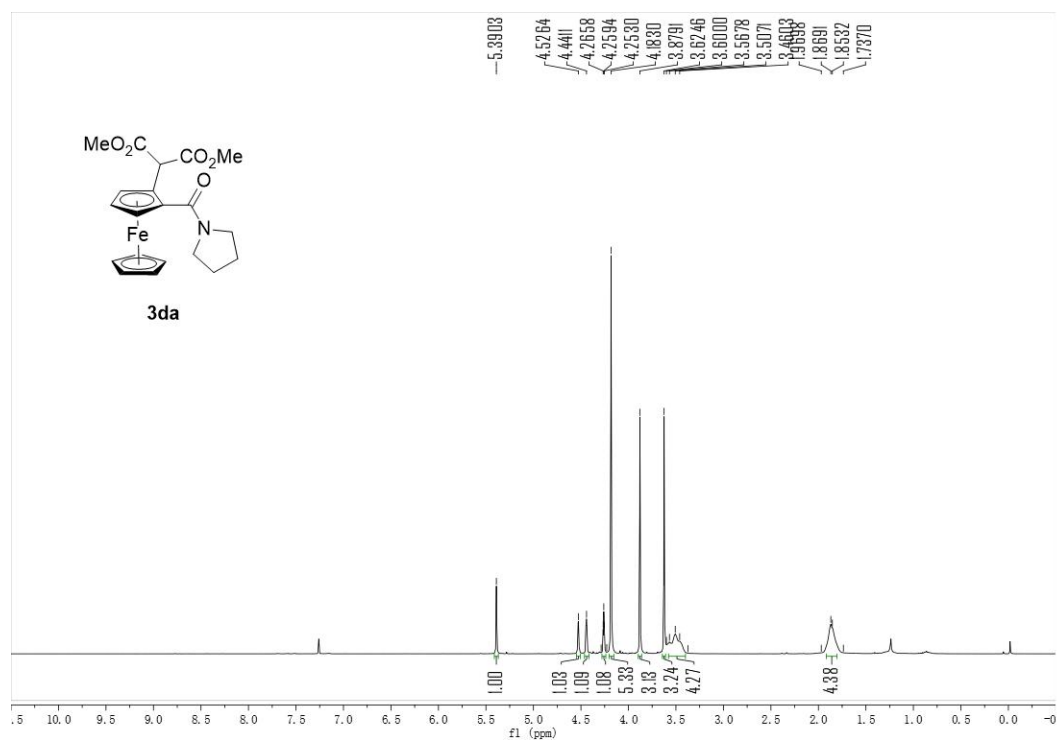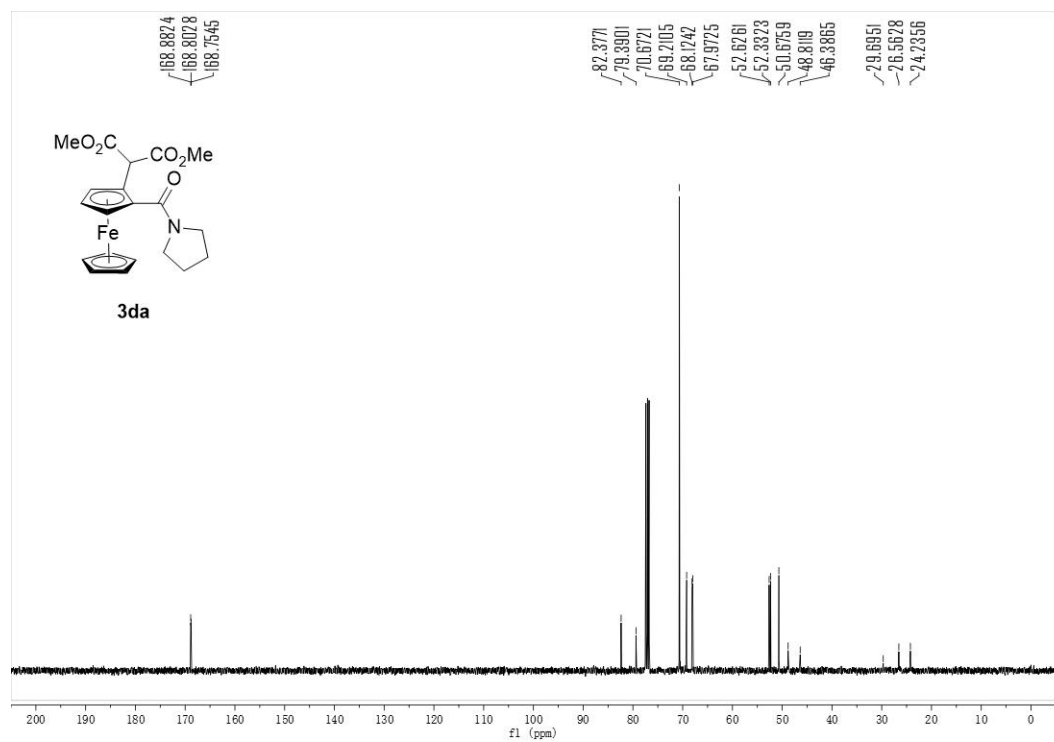

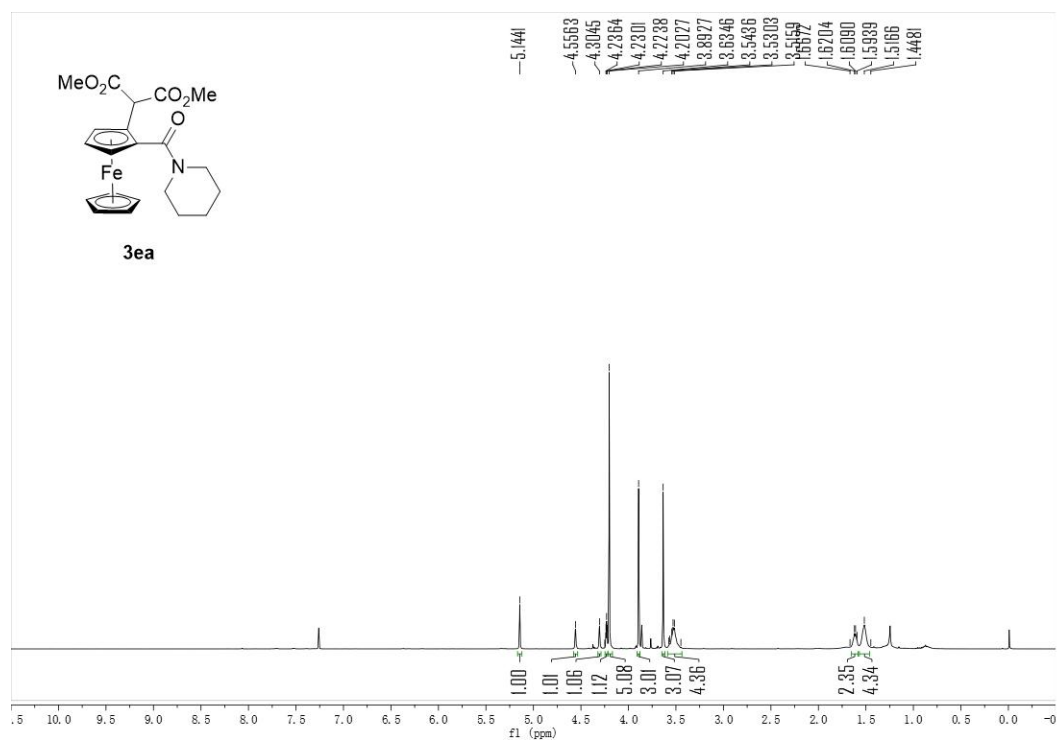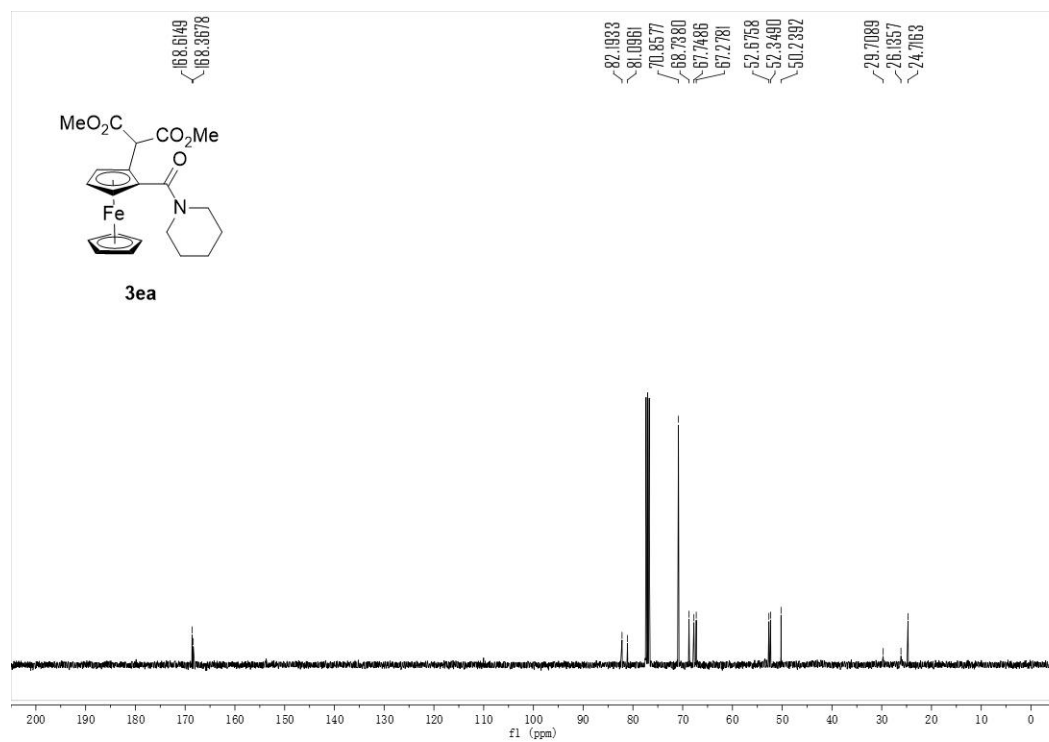

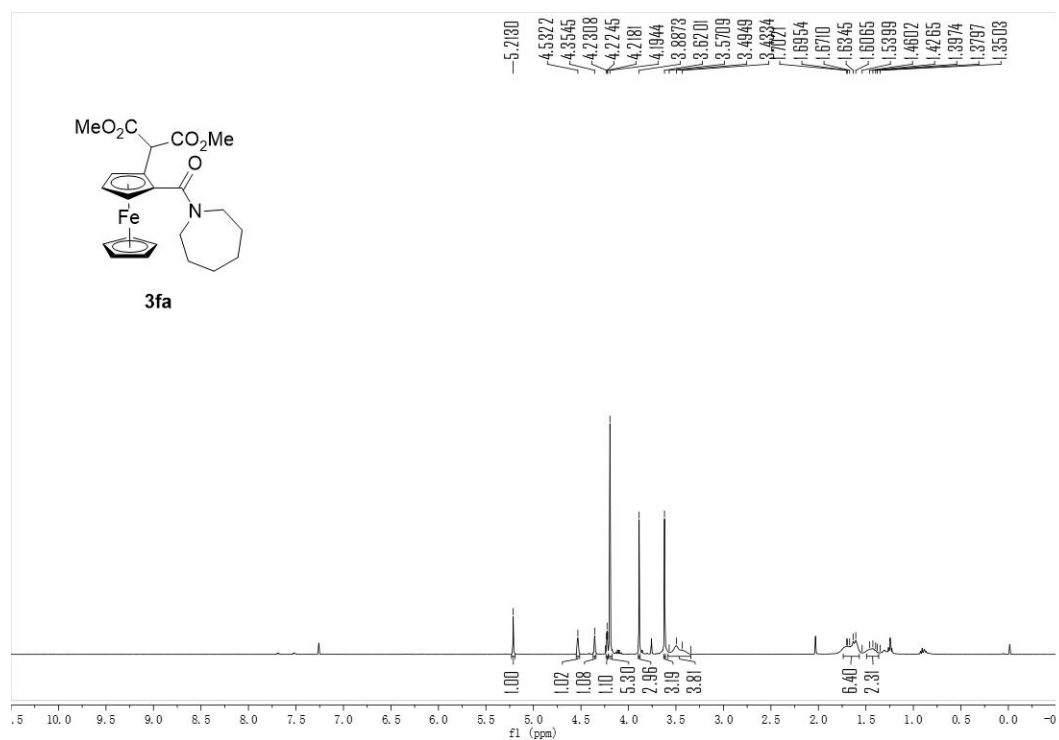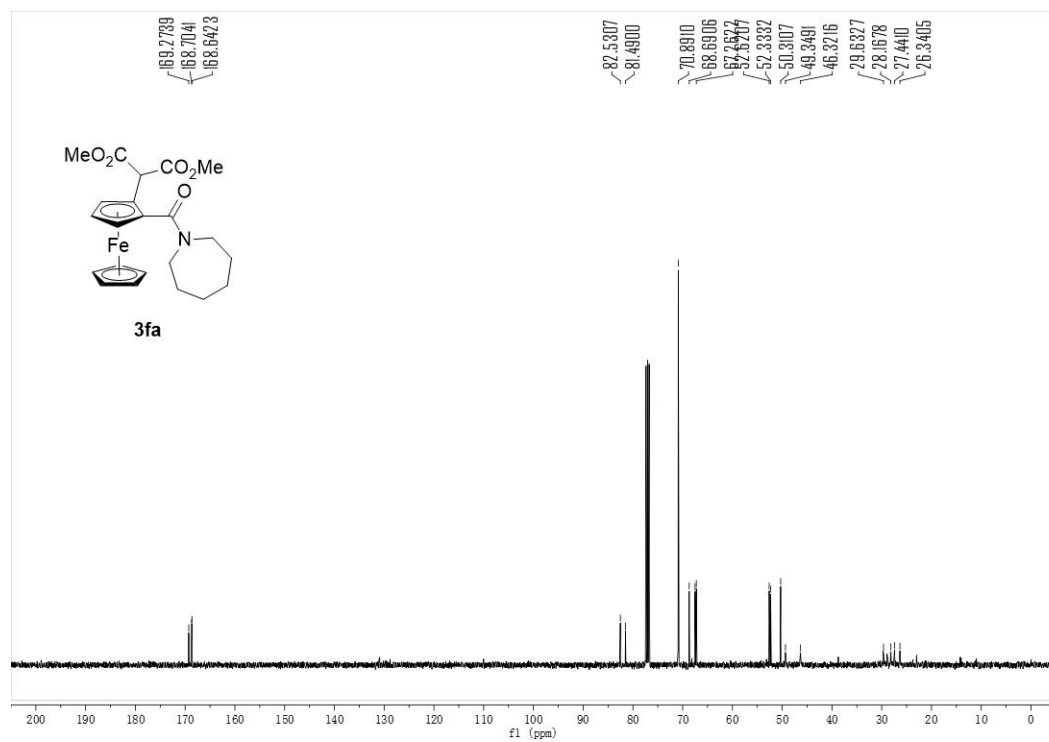

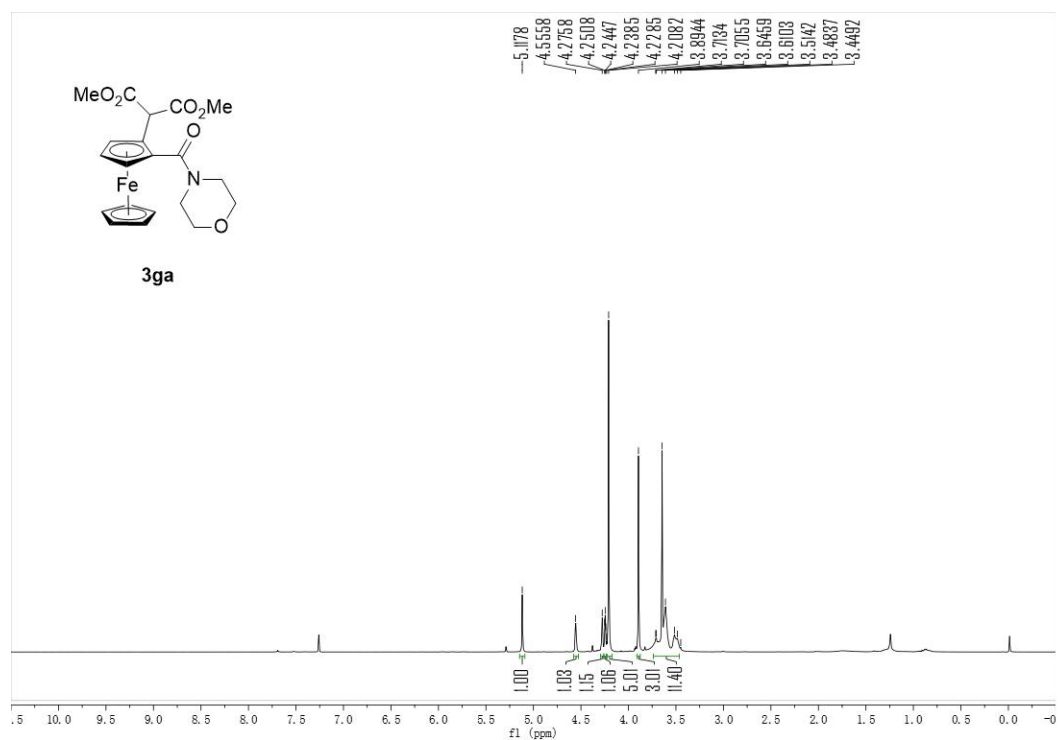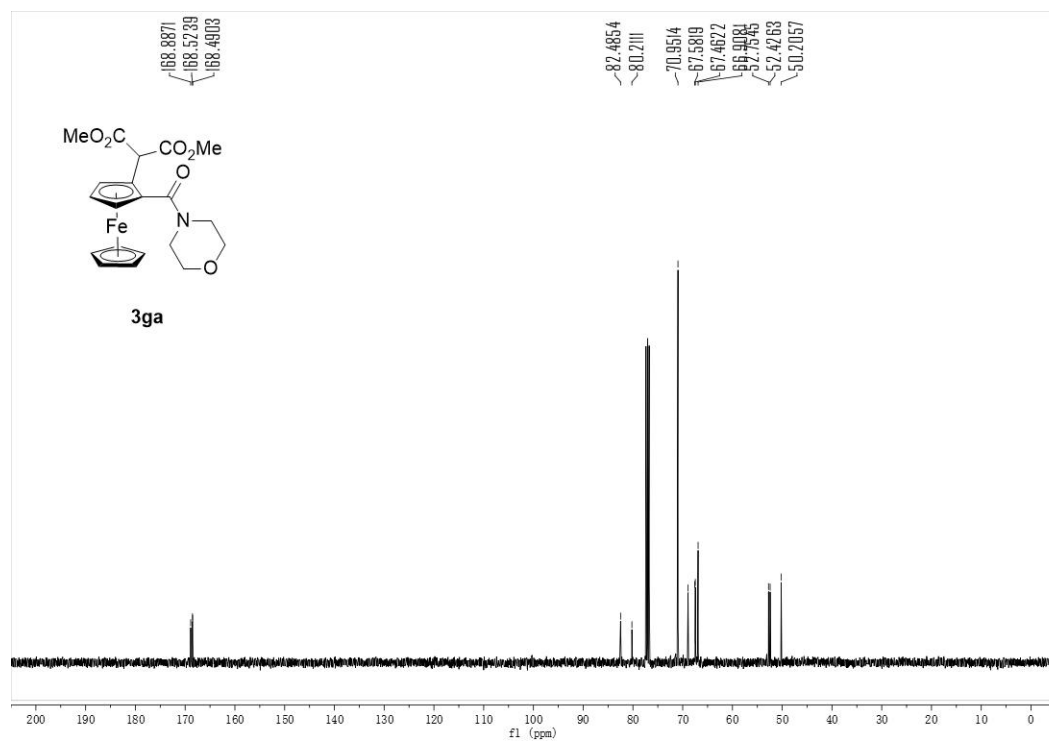

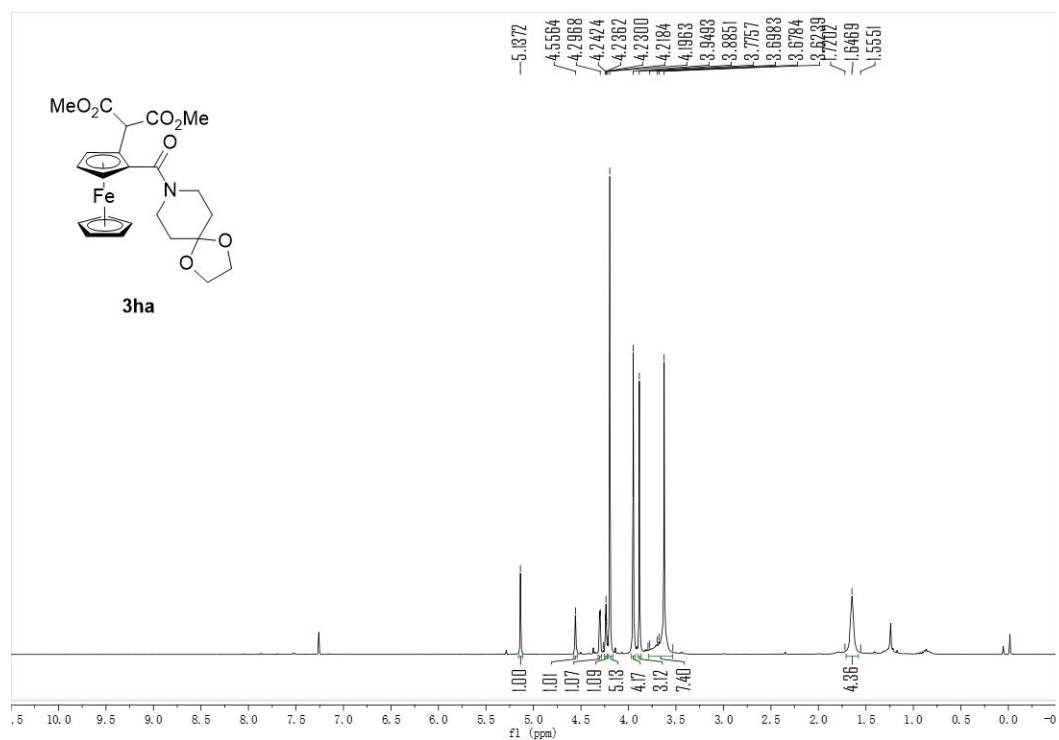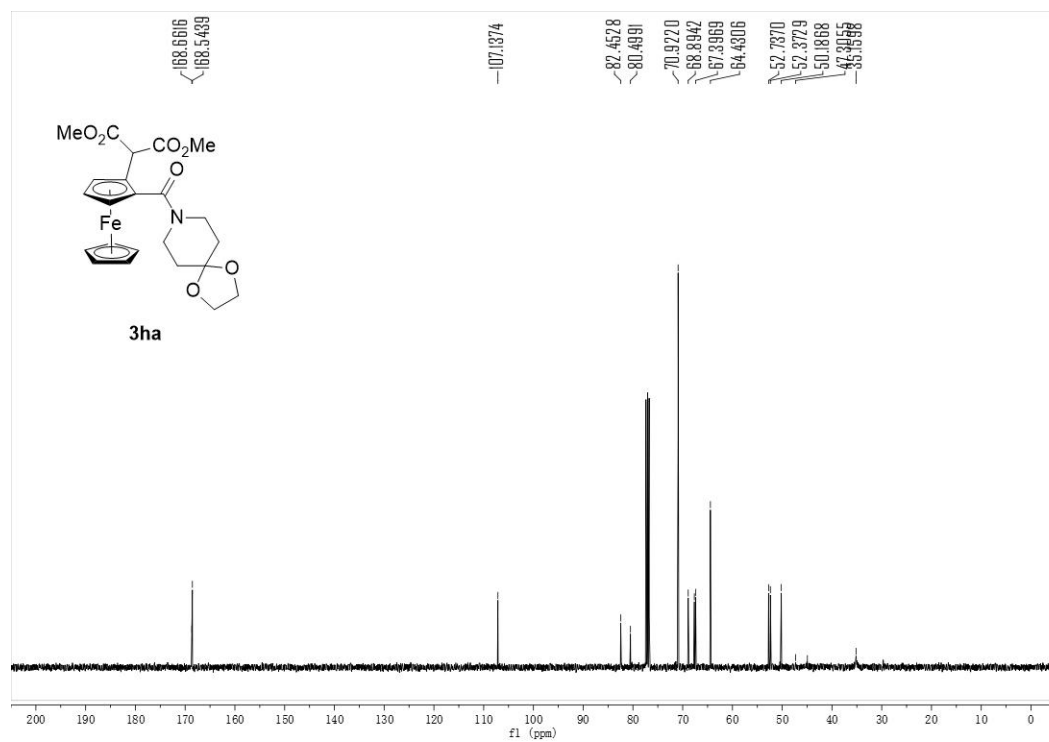

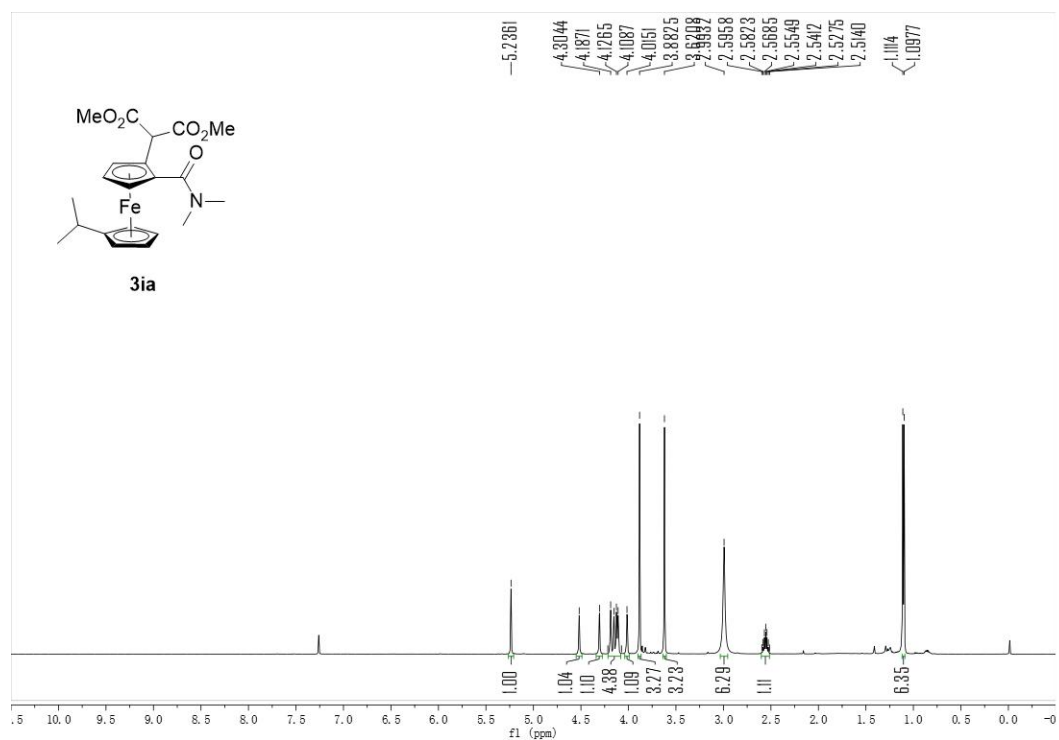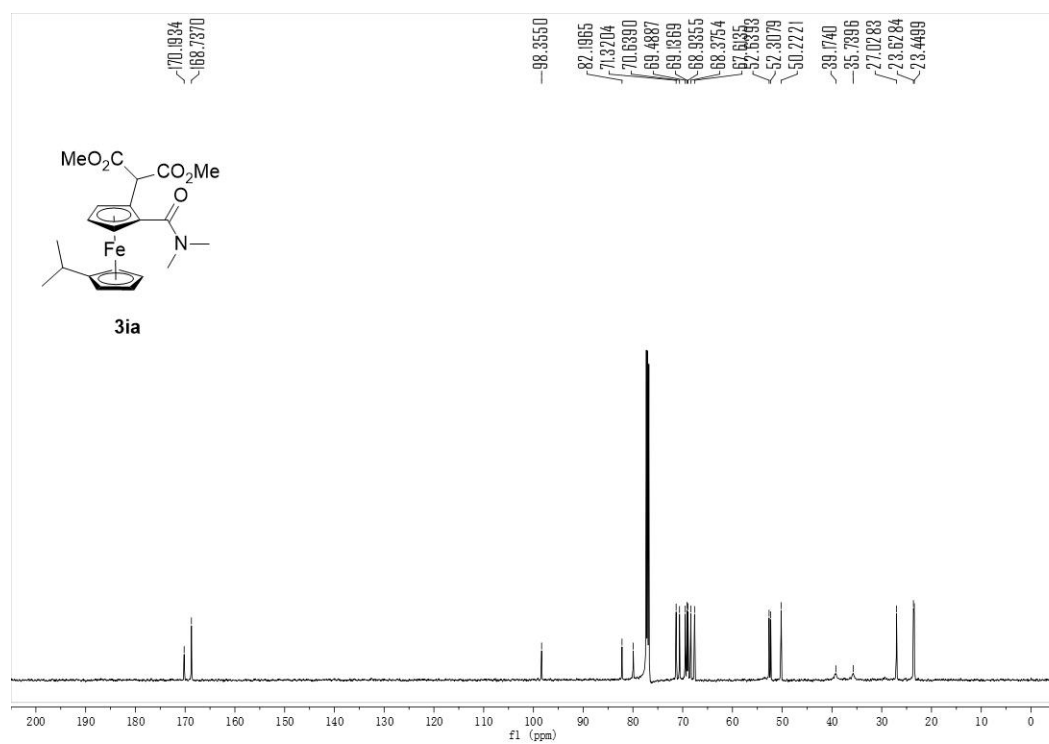



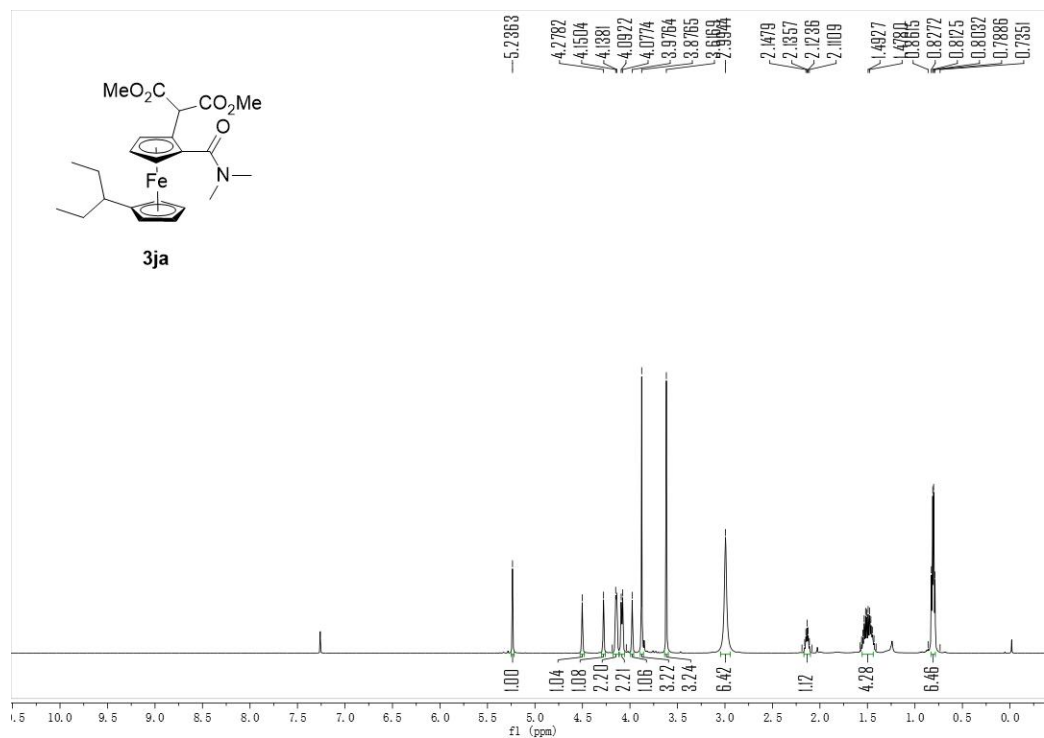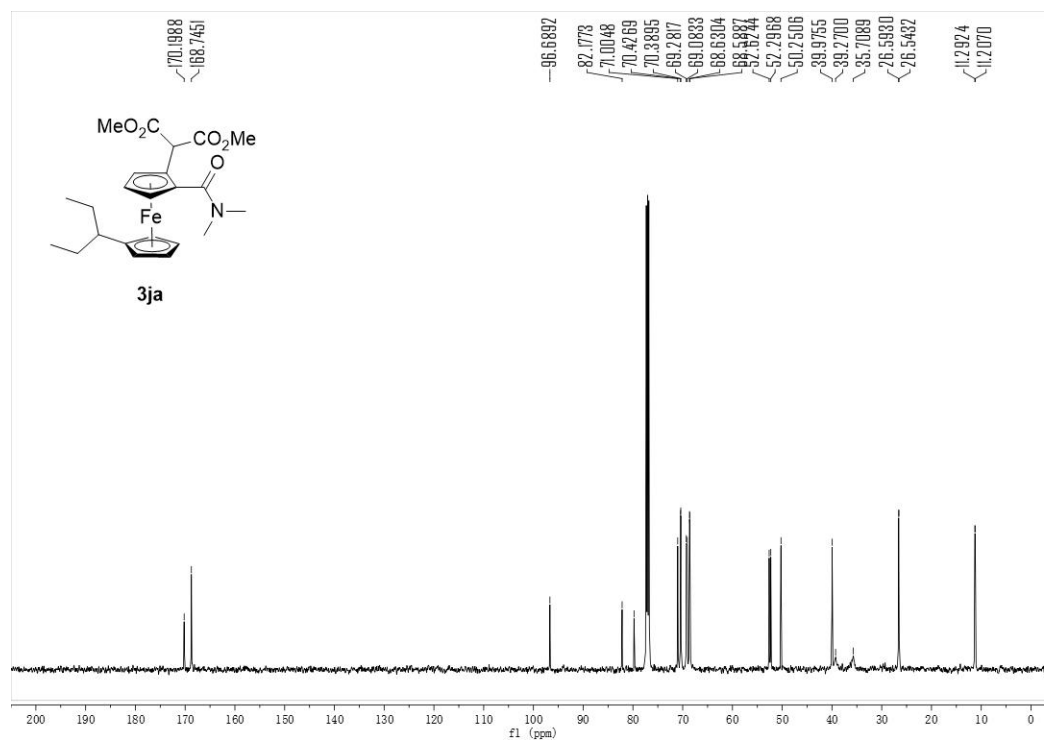

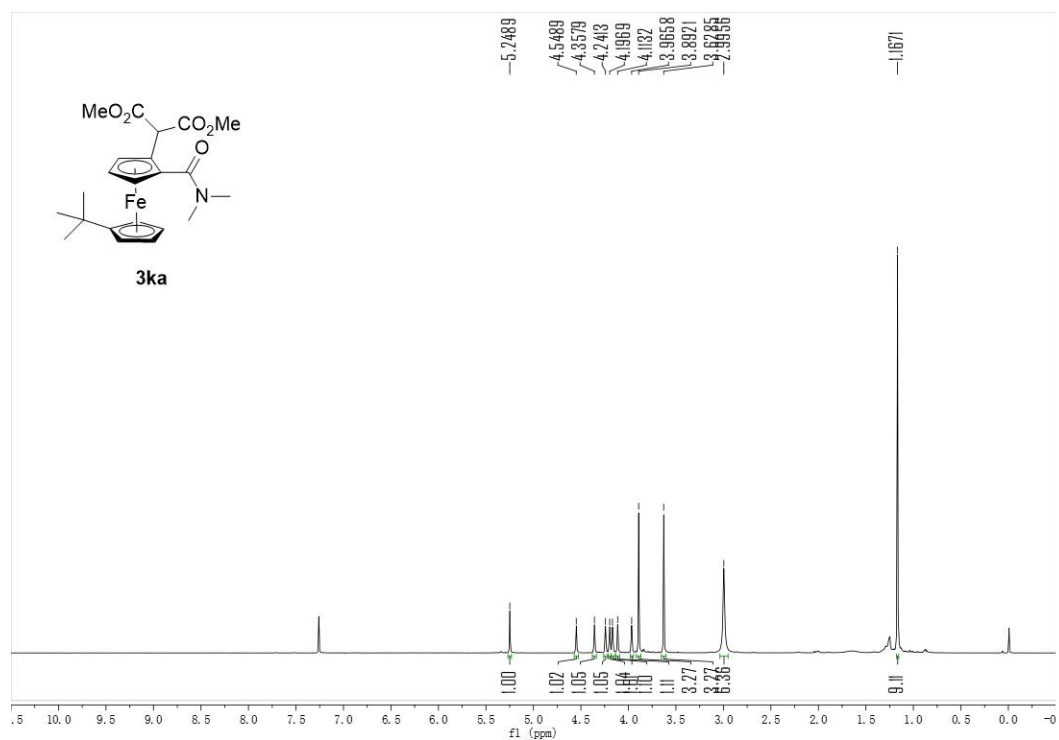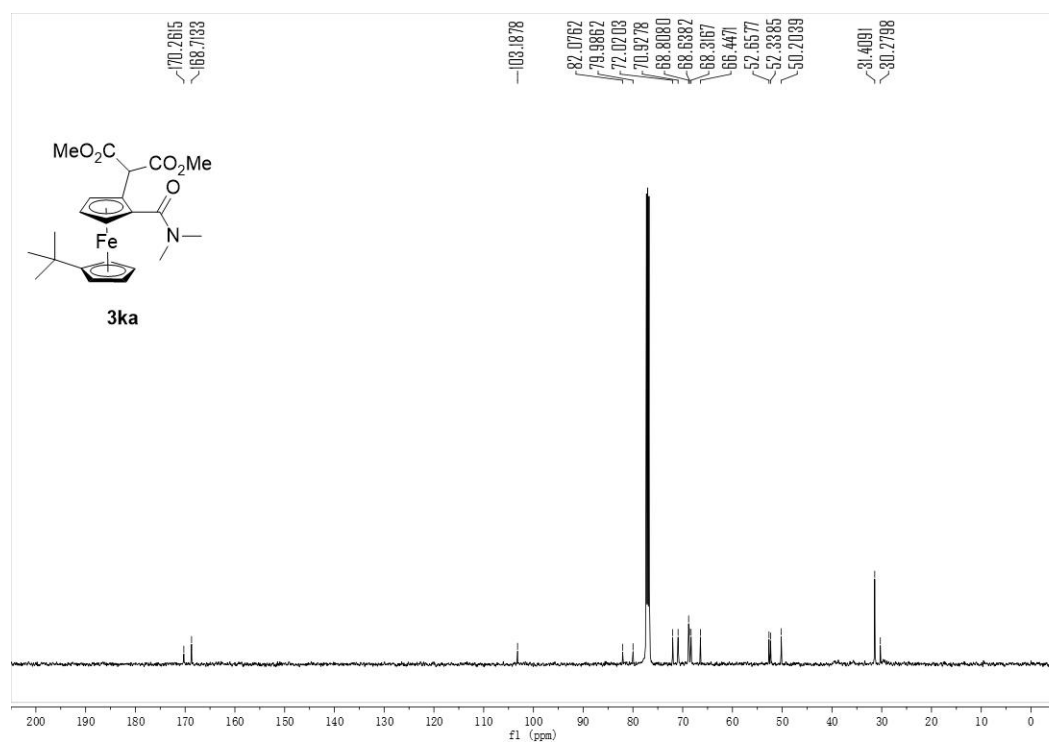

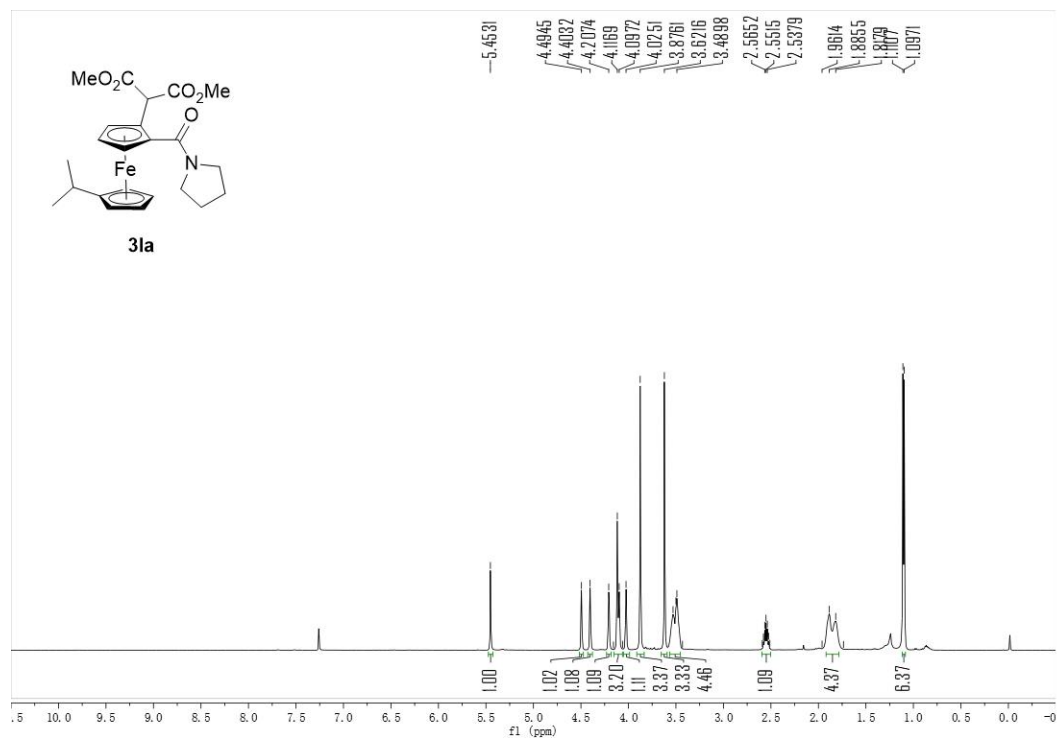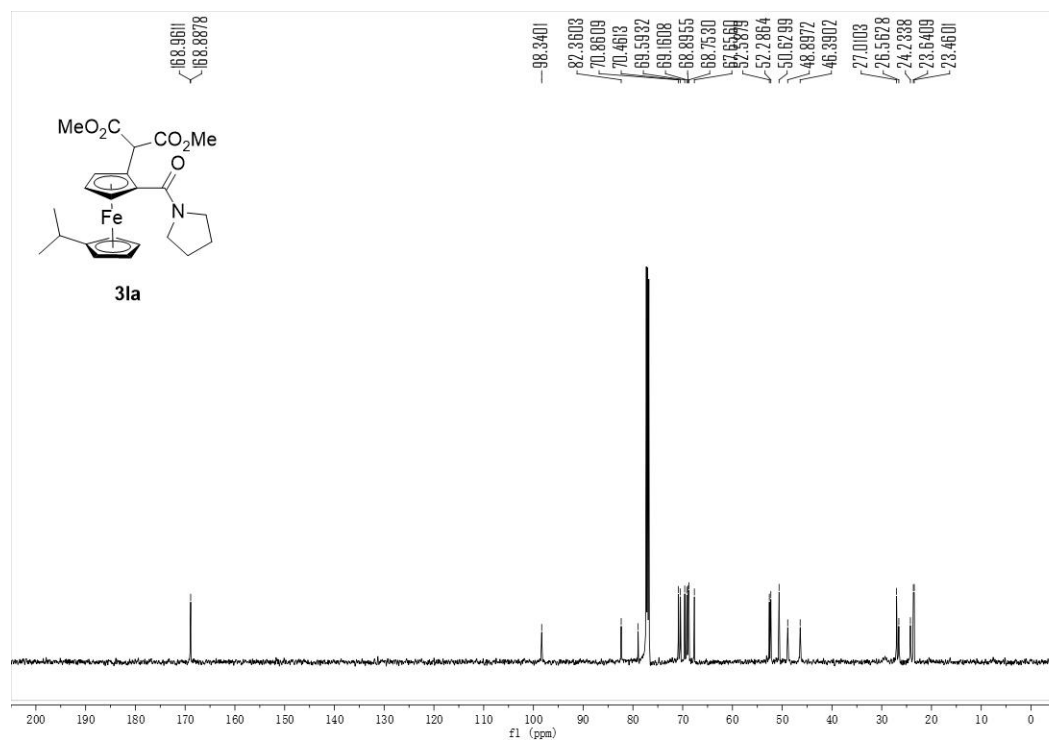

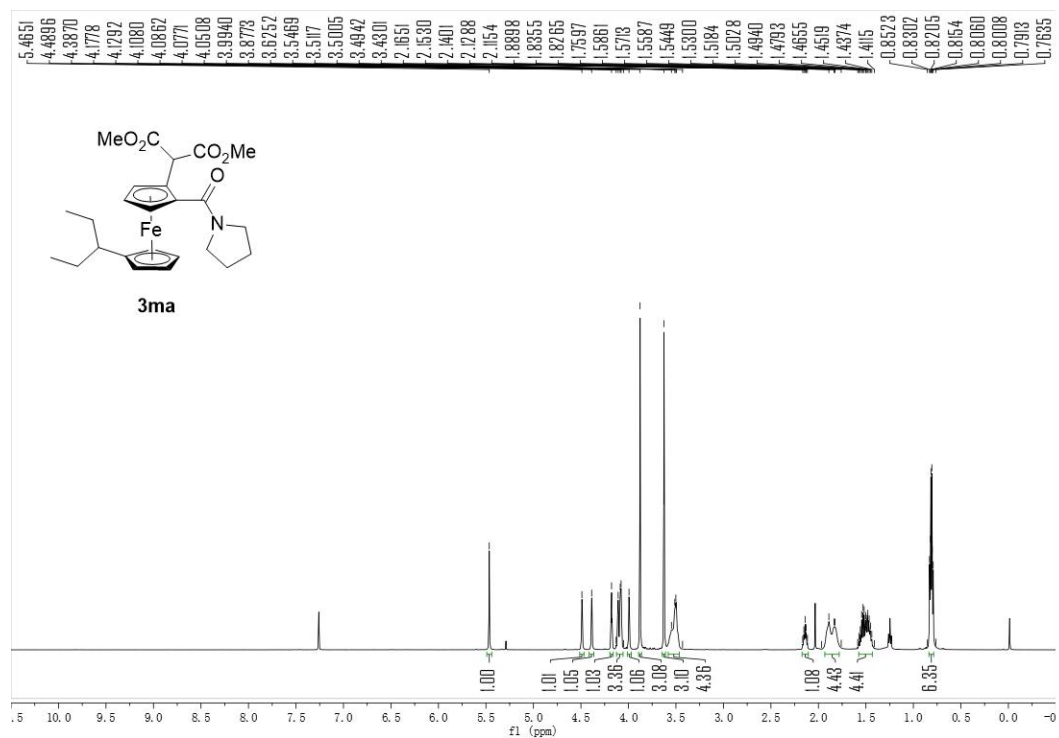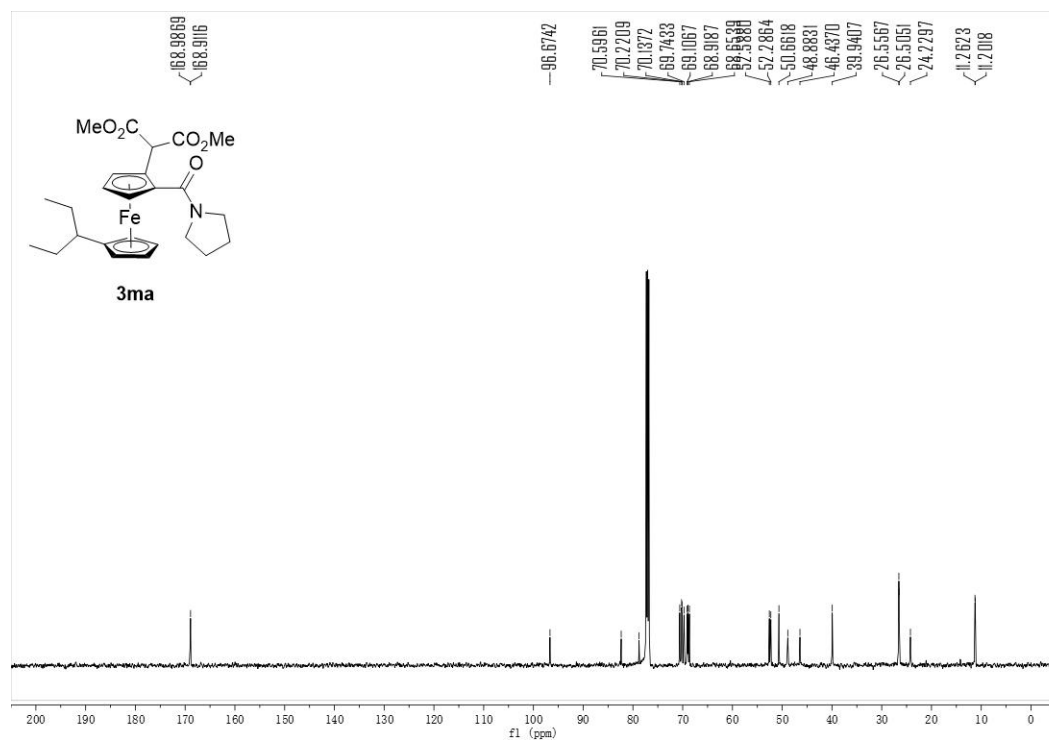

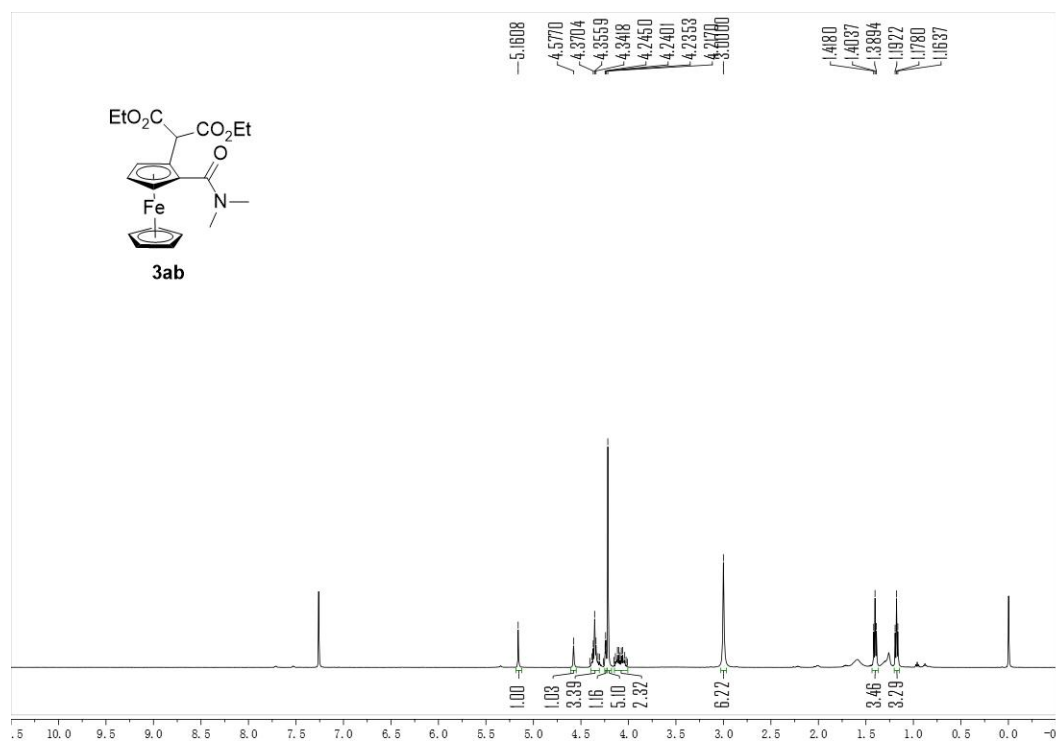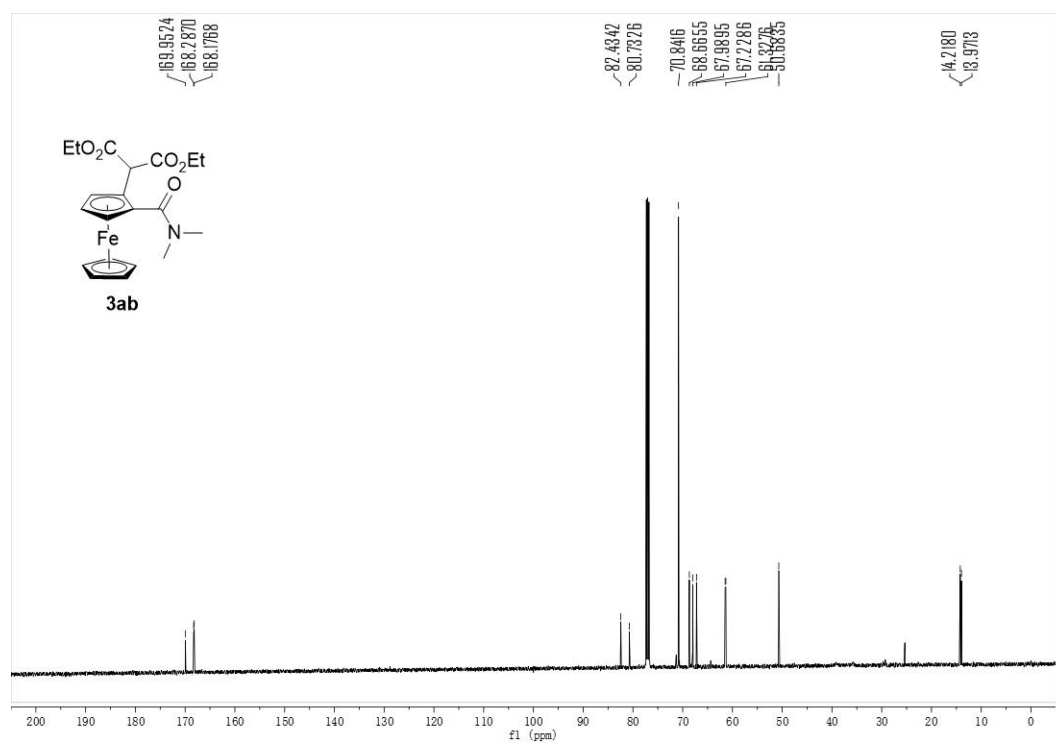

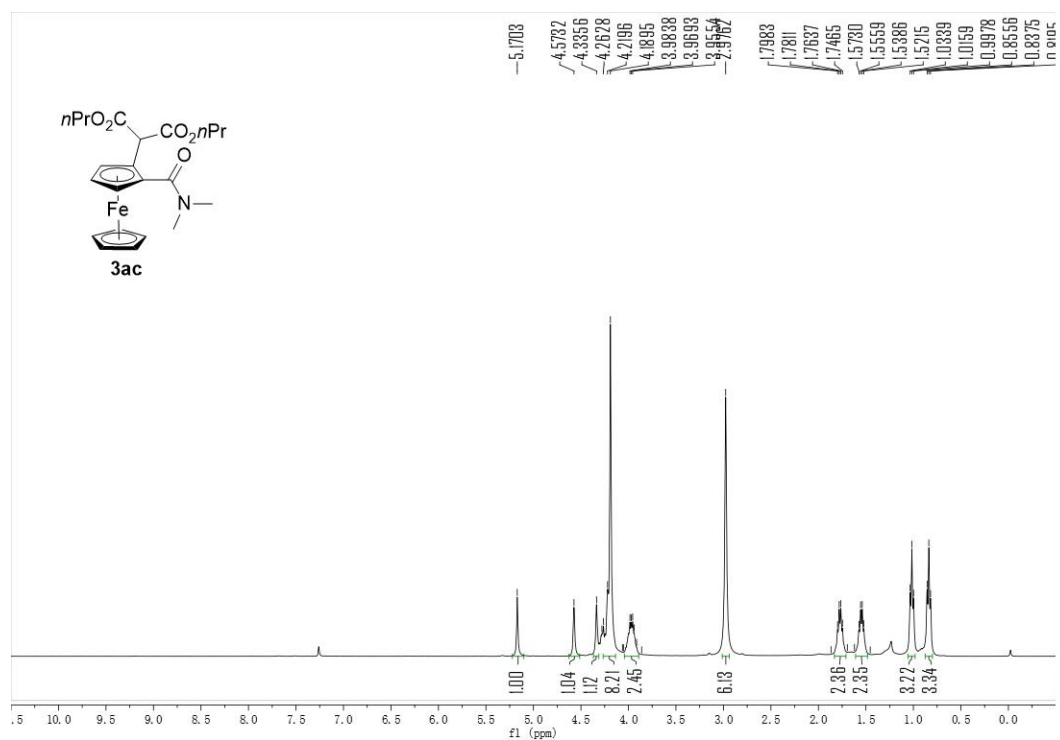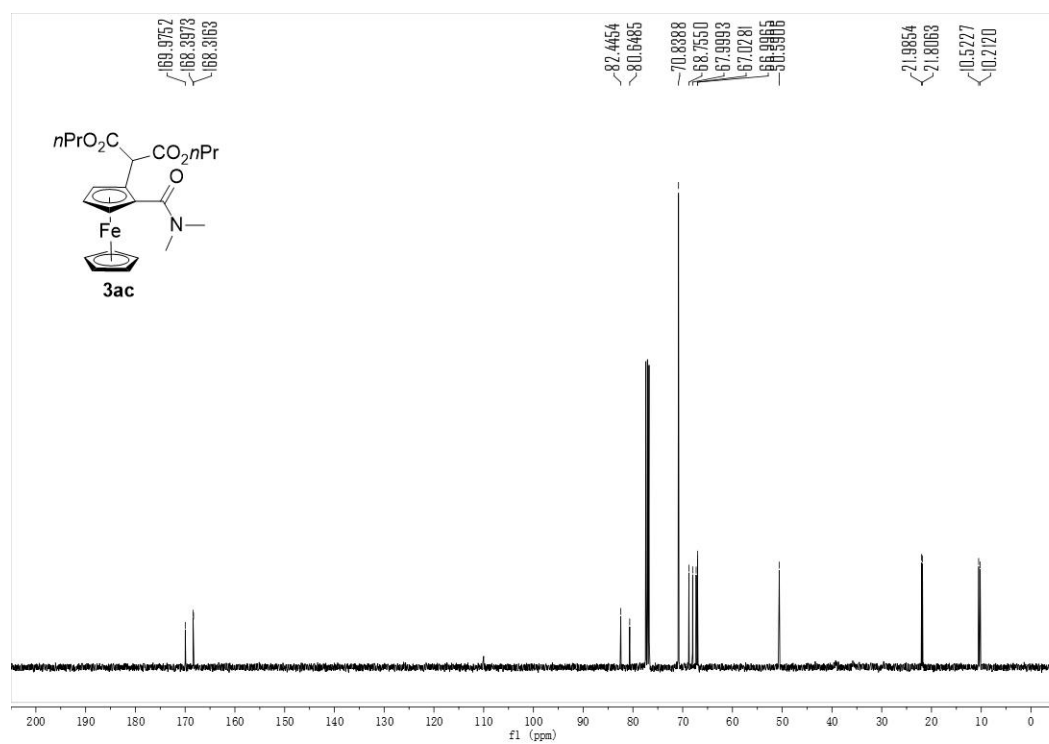

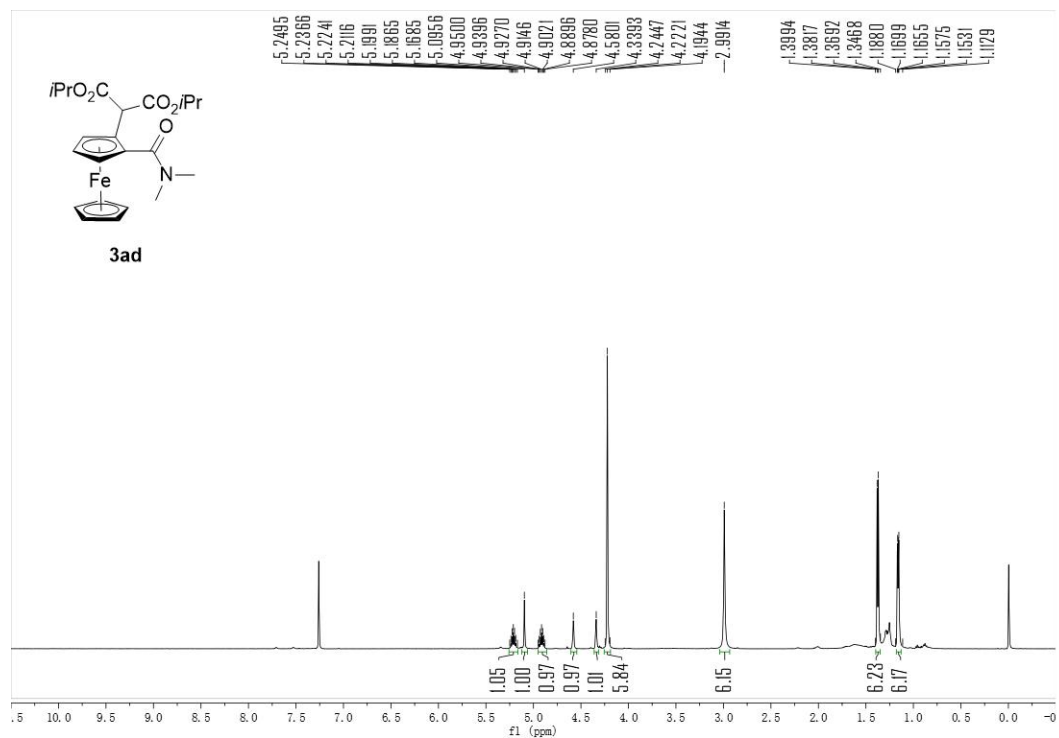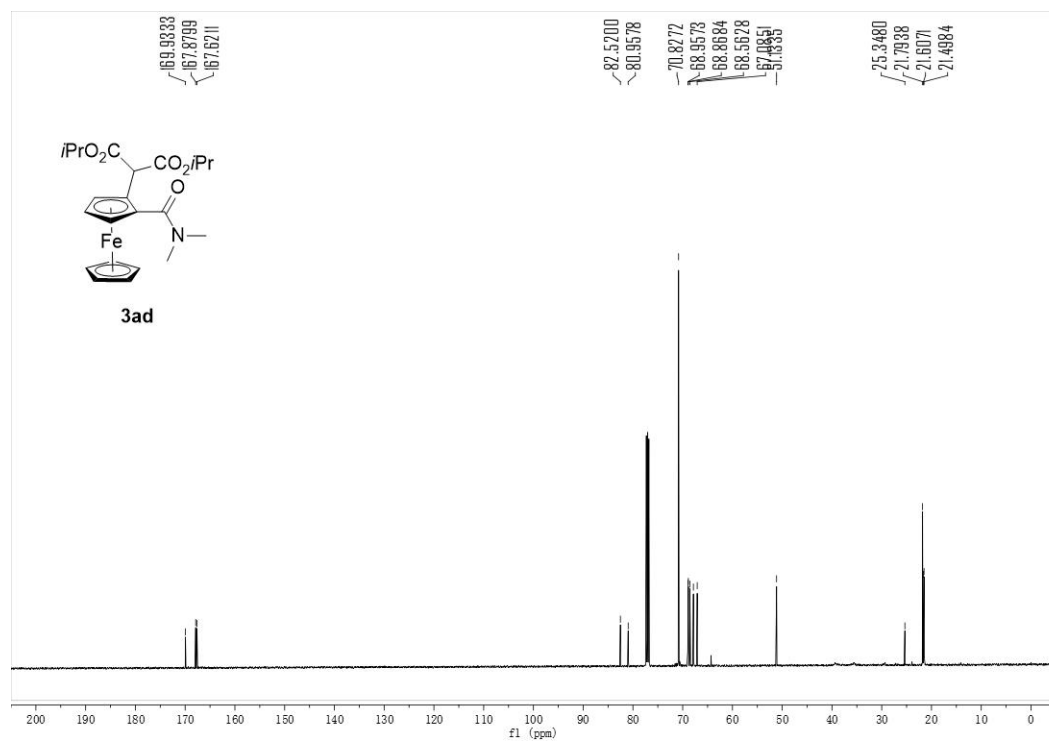

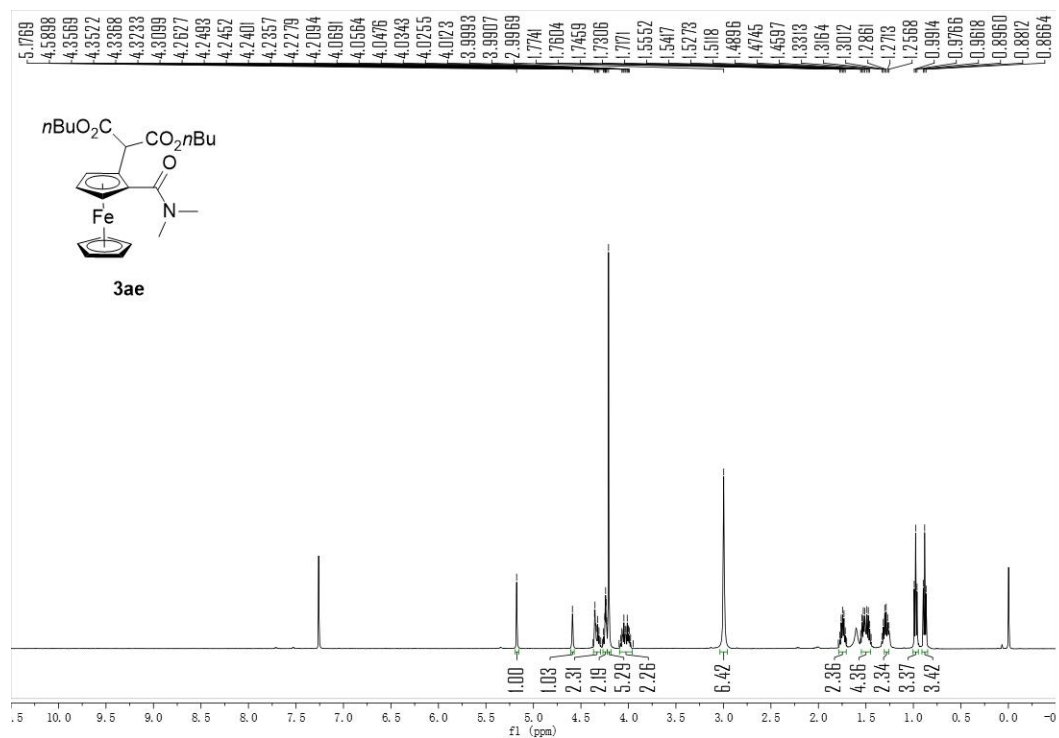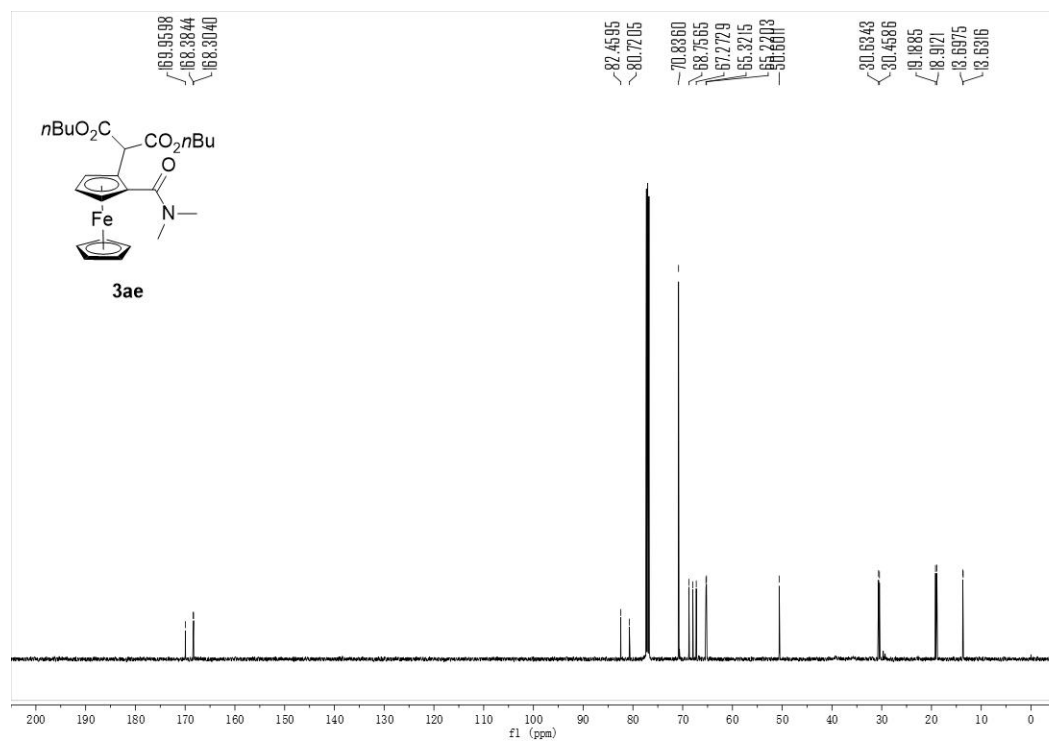



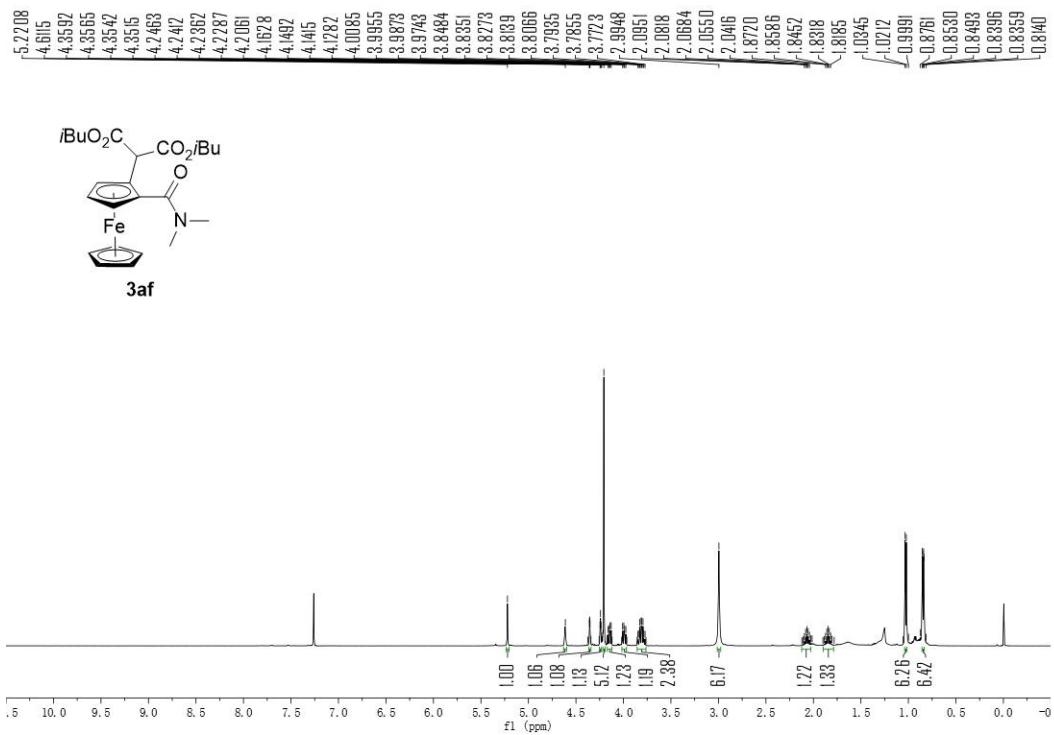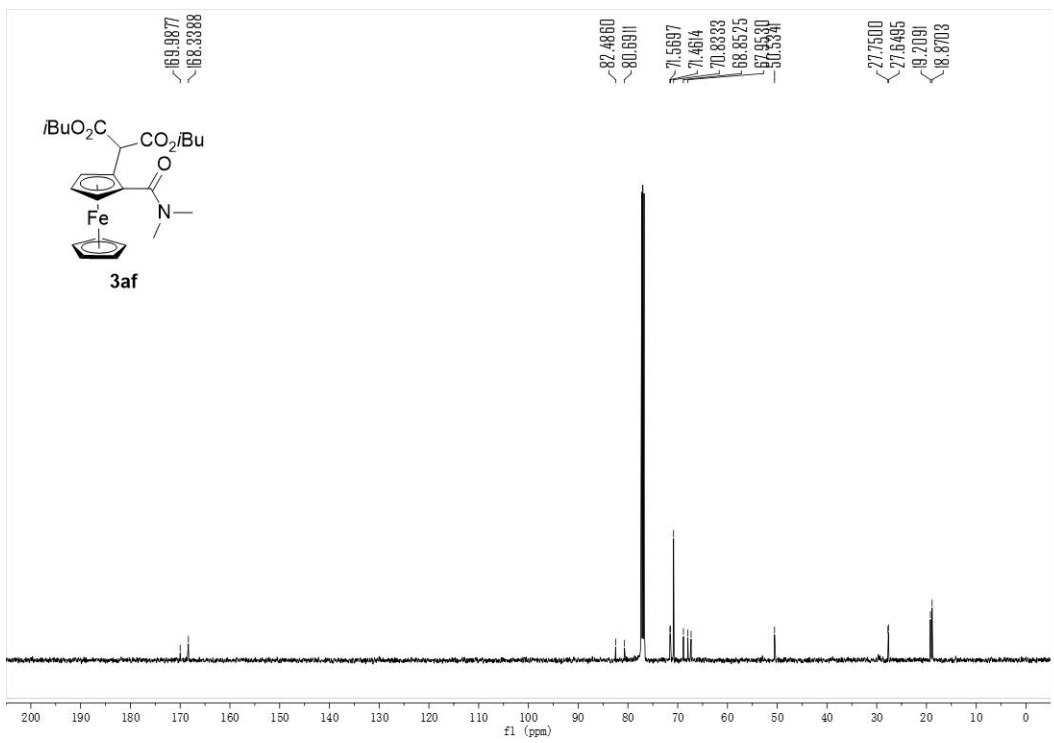

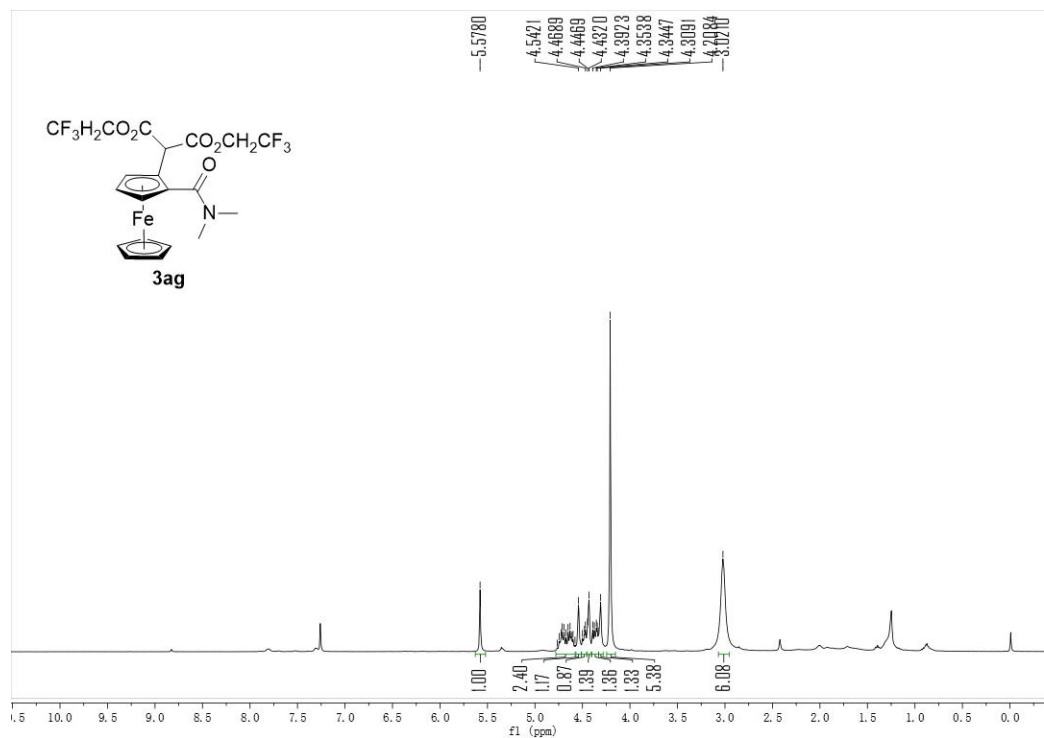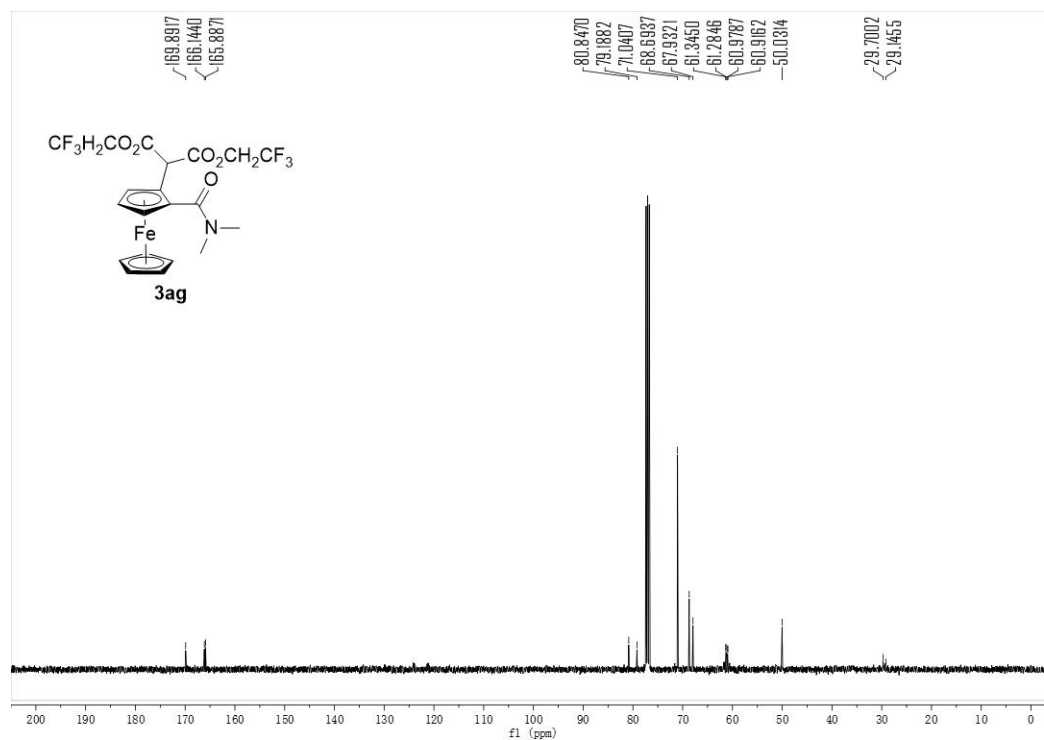

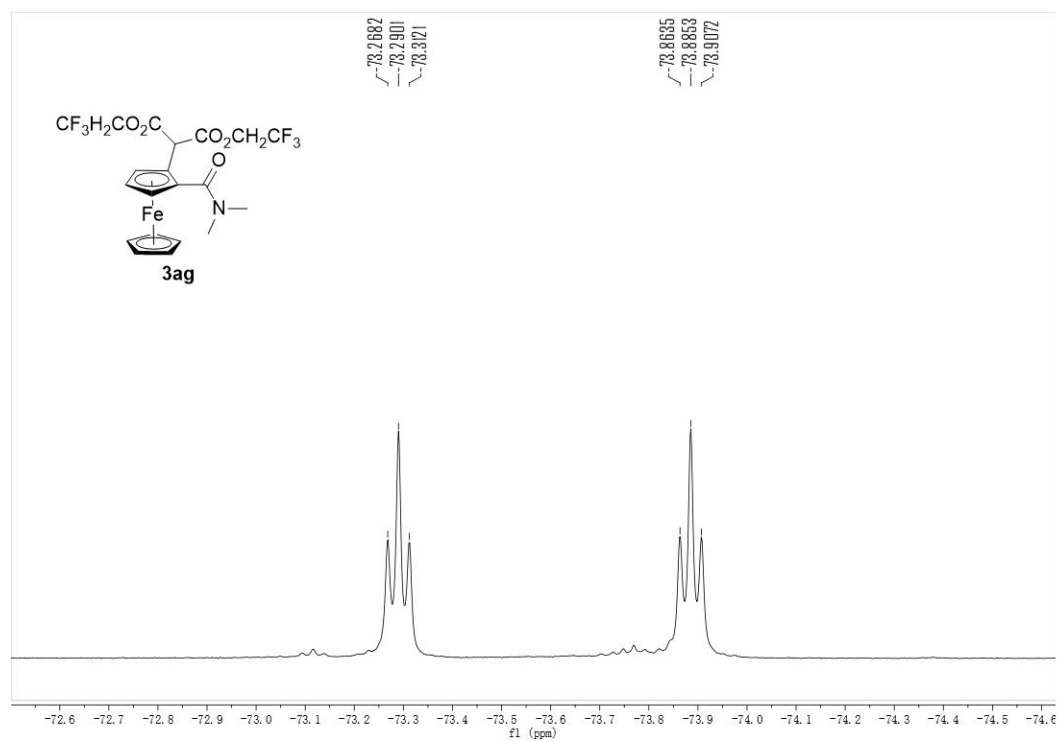

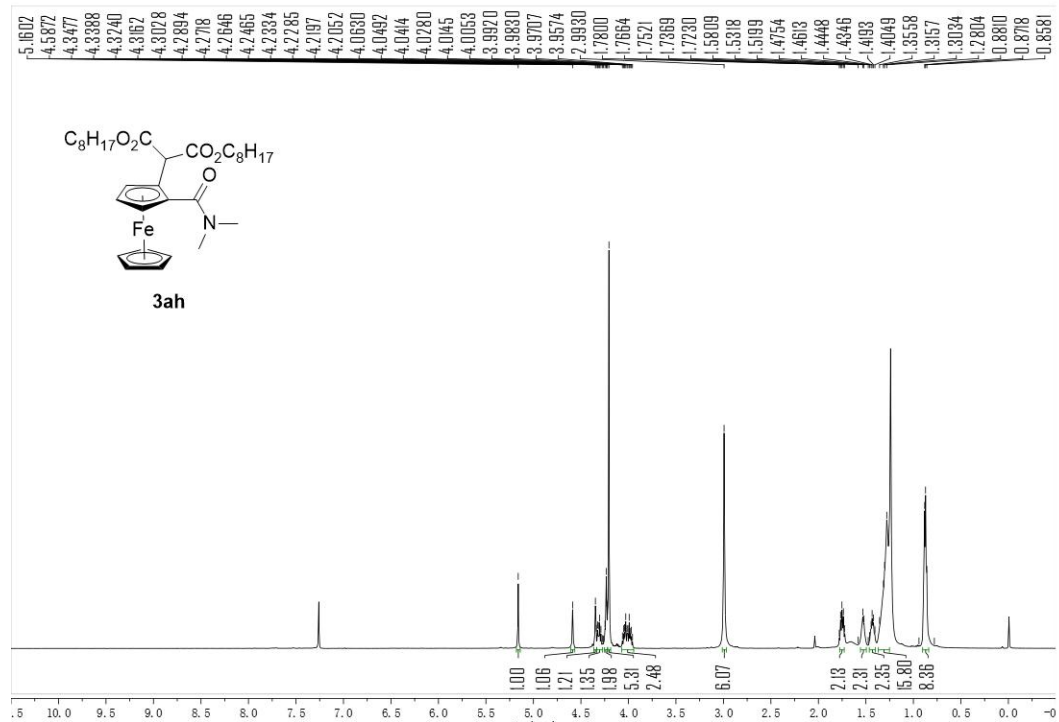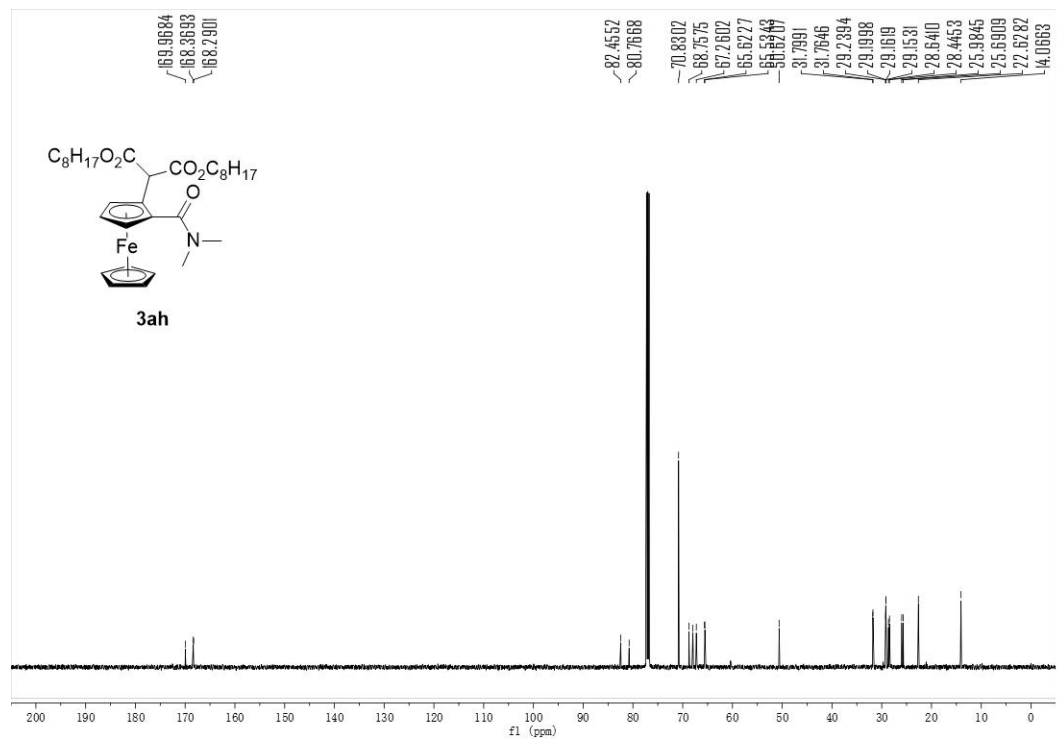

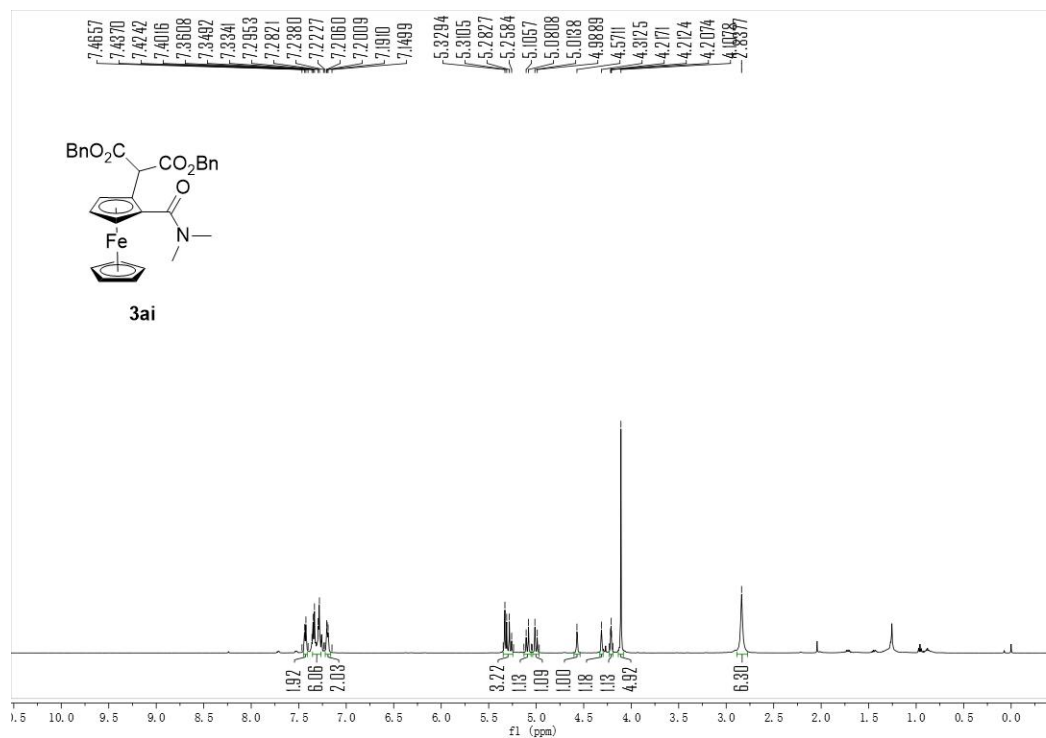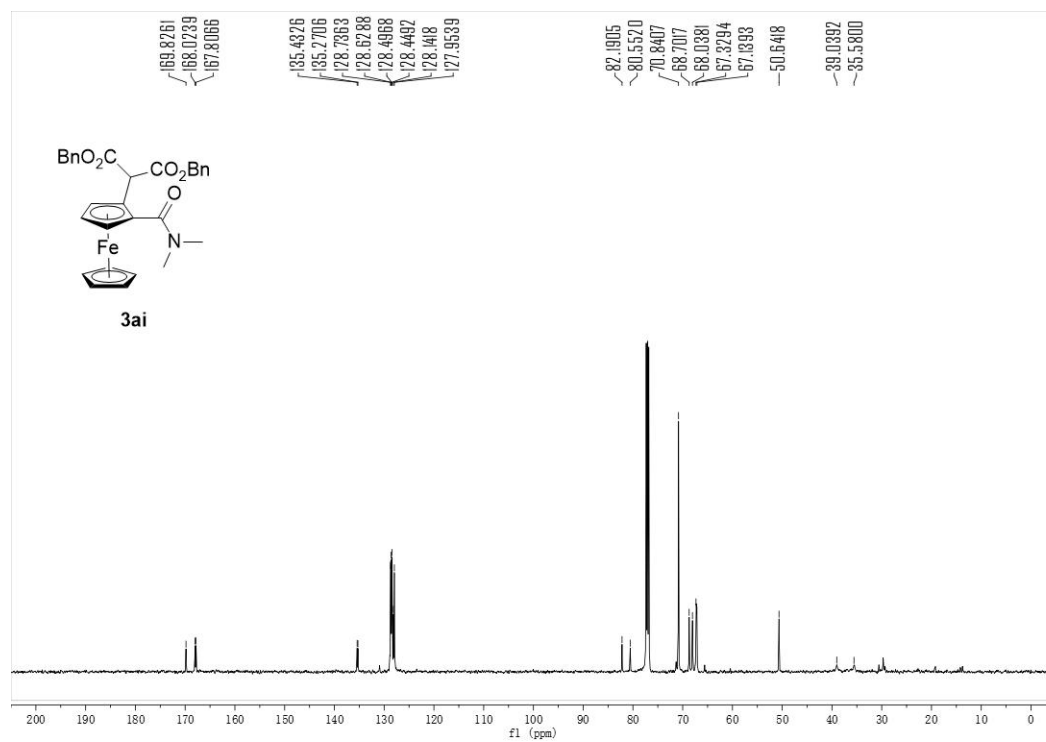

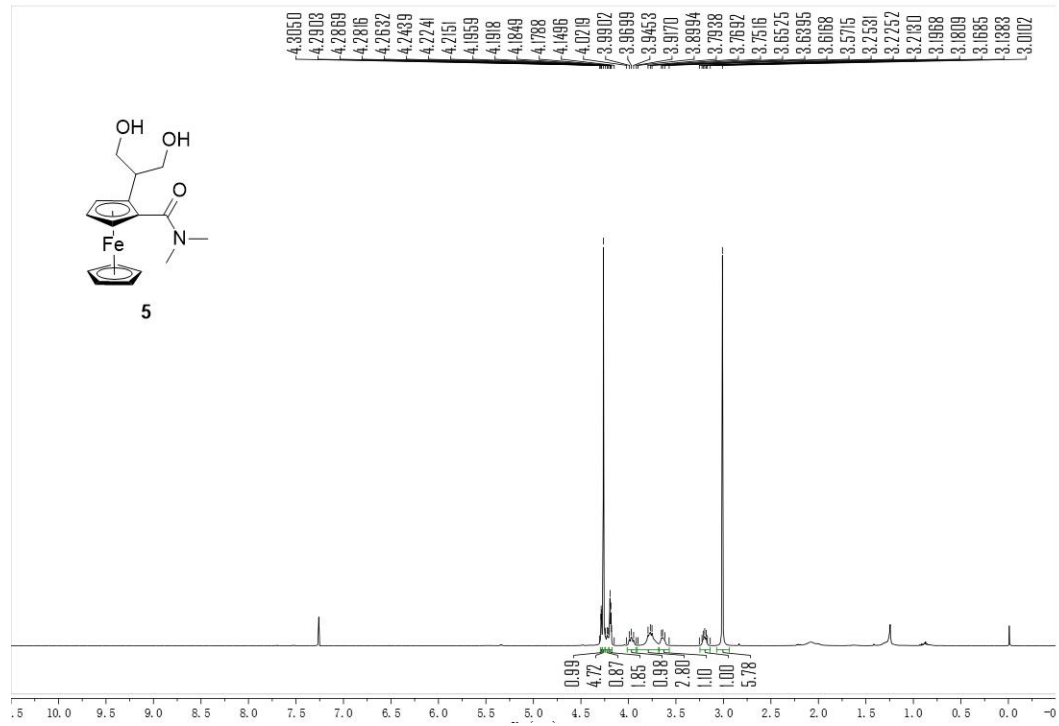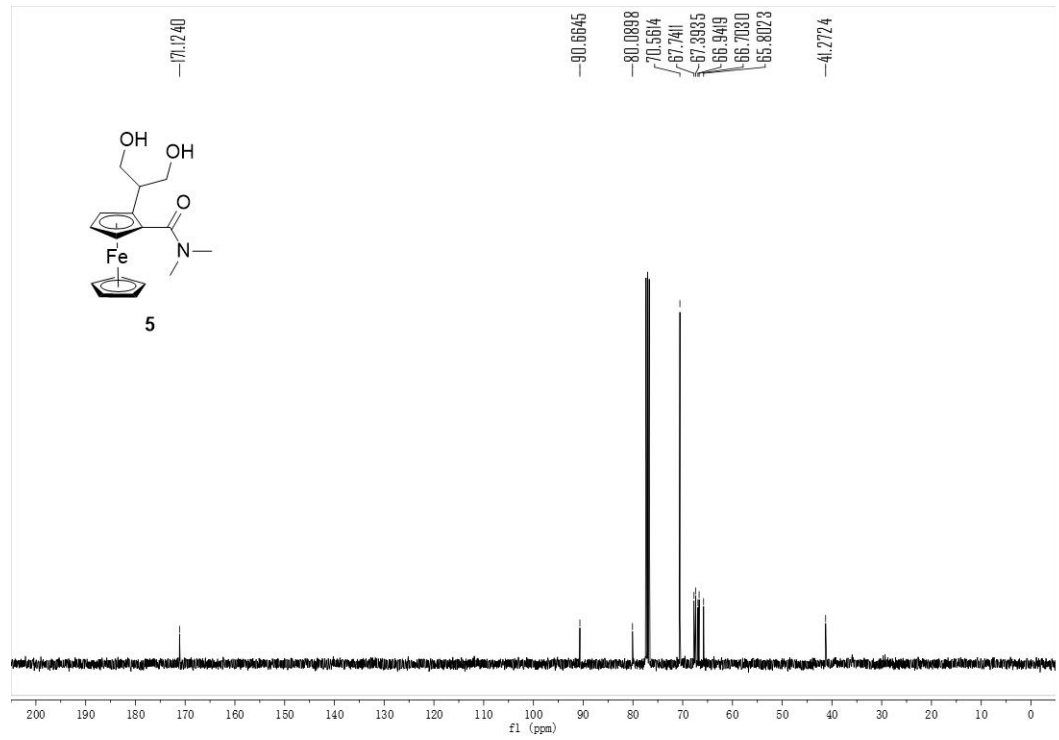

Supplement: d1qo01344k1.pdf [file d1qo01344k1.pdf]
